# Supplementary material for: Changes in Non-Deamidated versus Deamidated Epitope Targeting and Disease Prediction during the Antibody Response to Gliadin and Transglutaminase of Infants at Risk for Celiac Disease
Source: MDPI journal article supplement (doi:10.3390/ijms23052498), 2022-02-24
Supplement: s1 [file IJMS_supplement Table.xlsx]

## Sheet: NGP (TG2-) IgG
Cut off	Sensitivity%	95% CI	Specificity%	95% CI	Accuracy%
> 0.03	100	97,84% to 100%	0.1953	0,004945% to 1,083%	50.0977
> 0.06	100	97,84% to 100%	0.3906	0,04734% to 1,404%	50.1953
> 0.085	100	97,84% to 100%	0.5859	0,121% to 1,703%	50.2929
> 0.11	99.41	96,75% to 99,99%	0.5859	0,121% to 1,703%	49.9979
> 0.125	98.82	95,79% to 99,86%	0.7813	0,2133% to 1,988%	49.8006
> 0.145	98.82	95,79% to 99,86%	0.9766	0,3178% to 2,264%	49.8983
> 0.165	98.82	95,79% to 99,86%	1.172	0,4312% to 2,533%	49.996
> 0.175	98.22	94,9% to 99,63%	1.172	0,4312% to 2,533%	49.696
> 0.19	98.22	94,9% to 99,63%	1.367	0,5514% to 2,797%	49.7935
> 0.21	98.22	94,9% to 99,63%	1.563	0,6769% to 3,055%	49.8915
> 0.23	98.22	94,9% to 99,63%	1.758	0,8069% to 3,311%	49.989
> 0.245	98.22	94,9% to 99,63%	2.148	1,077% to 3,812%	50.184
> 0.27	97.63	94,05% to 99,35%	2.148	1,077% to 3,812%	49.889
> 0.295	97.04	93,23% to 99,03%	2.539	1,359% to 4,303%	49.7895
> 0.31	96.45	92,43% to 98,69%	3.125	1,797% to 5,025%	49.7875
> 0.325	96.45	92,43% to 98,69%	3.516	2,097% to 5,499%	49.983
> 0.335	95.86	91,65% to 98,32%	3.711	2,249% to 5,735%	49.7855
> 0.345	95.27	90,89% to 97,93%	3.711	2,249% to 5,735%	49.4905
> 0.36	95.27	90,89% to 97,93%	4.102	2,557% to 6,202%	49.686
> 0.38	95.27	90,89% to 97,93%	4.297	2,712% to 6,433%	49.7835
> 0.4	94.67	90,13% to 97,54%	4.297	2,712% to 6,433%	49.4835
> 0.415	94.08	89,39% to 97,13%	4.297	2,712% to 6,433%	49.1885
> 0.425	94.08	89,39% to 97,13%	4.492	2,869% to 6,664%	49.286
> 0.44	94.08	89,39% to 97,13%	4.688	3,026% to 6,895%	49.384
> 0.455	94.08	89,39% to 97,13%	4.883	3,184% to 7,124%	49.4815
> 0.48	94.08	89,39% to 97,13%	5.078	3,344% to 7,352%	49.579
> 0.505	94.08	89,39% to 97,13%	5.469	3,664% to 7,807%	49.7745
> 0.515	94.08	89,39% to 97,13%	5.664	3,826% to 8,034%	49.872
> 0.54	93.49	88,65% to 96,71%	5.664	3,826% to 8,034%	49.577
> 0.575	92.9	87,93% to 96,28%	5.664	3,826% to 8,034%	49.282
> 0.6	92.9	87,93% to 96,28%	5.859	3,988% to 8,259%	49.3795
> 0.65	92.31	87,21% to 95,84%	5.859	3,988% to 8,259%	49.0845
> 0.695	91.72	86,49% to 95,4%	5.859	3,988% to 8,259%	48.7895
> 0.705	91.72	86,49% to 95,4%	6.25	4,314% to 8,709%	48.985
> 0.715	91.12	85,78% to 94,95%	6.25	4,314% to 8,709%	48.685
> 0.735	91.12	85,78% to 94,95%	6.445	4,478% to 8,933%	48.7825
> 0.76	90.53	85,08% to 94,49%	6.445	4,478% to 8,933%	48.4875
> 0.775	90.53	85,08% to 94,49%	6.641	4,642% to 9,156%	48.5855
> 0.805	90.53	85,08% to 94,49%	6.836	4,807% to 9,379%	48.683
> 0.835	90.53	85,08% to 94,49%	7.031	4,973% to 9,602%	48.7805
> 0.875	89.35	83,69% to 93,56%	7.031	4,973% to 9,602%	48.1905
> 0.915	88.76	83% to 93,09%	7.031	4,973% to 9,602%	47.8955
> 0.93	88.17	82,32% to 92,62%	7.227	5,139% to 9,824%	47.6985
> 0.945	88.17	82,32% to 92,62%	7.422	5,305% to 10,05%	47.796
> 0.96	87.57	81,63% to 92,14%	7.422	5,305% to 10,05%	47.496
> 0.975	87.57	81,63% to 92,14%	7.617	5,472% to 10,27%	47.5935
> 0.985	87.57	81,63% to 92,14%	8.008	5,808% to 10,71%	47.789
> 1.005	87.57	81,63% to 92,14%	8.203	5,976% to 10,93%	47.8865
> 1.025	87.57	81,63% to 92,14%	8.398	6,145% to 11,15%	47.984
> 1.035	87.57	81,63% to 92,14%	8.594	6,314% to 11,37%	48.082
> 1.045	86.98	80,96% to 91,66%	8.594	6,314% to 11,37%	47.787
> 1.06	86.98	80,96% to 91,66%	8.789	6,483% to 11,58%	47.8845
> 1.095	86.98	80,96% to 91,66%	8.984	6,653% to 11,8%	47.982
> 1.135	86.98	80,96% to 91,66%	9.18	6,823% to 12,02%	48.08
> 1.175	86.98	80,96% to 91,66%	9.57	7,164% to 12,45%	48.275
> 1.205	86.98	80,96% to 91,66%	9.766	7,335% to 12,67%	48.373
> 1.23	86.39	80,28% to 91,17%	9.766	7,335% to 12,67%	48.078
> 1.28	86.39	80,28% to 91,17%	9.961	7,507% to 12,89%	48.1755
> 1.36	86.39	80,28% to 91,17%	10.16	7,679% to 13,1%	48.275
> 1.42	85.8	79,61% to 90,68%	10.16	7,679% to 13,1%	47.98
> 1.445	85.8	79,61% to 90,68%	10.35	7,851% to 13,32%	48.075
> 1.48	85.21	78,94% to 90,19%	10.35	7,851% to 13,32%	47.78
> 1.505	85.21	78,94% to 90,19%	10.55	8,023% to 13,54%	47.88
> 1.52	84.62	78,28% to 89,7%	10.74	8,196% to 13,75%	47.68
> 1.64	84.02	77,61% to 89,2%	10.74	8,196% to 13,75%	47.38
> 1.755	84.02	77,61% to 89,2%	10.94	8,368% to 13,97%	47.48
> 1.785	83.43	76,95% to 88,7%	10.94	8,368% to 13,97%	47.185
> 1.815	82.84	76,29% to 88,2%	10.94	8,368% to 13,97%	46.89
> 1.83	82.84	76,29% to 88,2%	11.13	8,542% to 14,18%	46.985
> 1.89	82.84	76,29% to 88,2%	11.33	8,715% to 14,4%	47.085
> 1.945	82.25	75,64% to 87,69%	11.33	8,715% to 14,4%	46.79
> 1.955	81.66	74,99% to 87,18%	11.52	8,889% to 14,61%	46.59
> 1.98	81.66	74,99% to 87,18%	11.72	9,063% to 14,83%	46.69
> 2.025	81.66	74,99% to 87,18%	12.11	9,411% to 15,25%	46.885
> 2.055	81.66	74,99% to 87,18%	12.3	9,586% to 15,47%	46.98
> 2.085	81.66	74,99% to 87,18%	12.5	9,761% to 15,68%	47.08
> 2.115	81.66	74,99% to 87,18%	12.7	9,936% to 15,89%	47.18
> 2.165	81.07	74,33% to 86,67%	12.7	9,936% to 15,89%	46.885
> 2.22	81.07	74,33% to 86,67%	12.89	10,11% to 16,11%	46.98
> 2.25	81.07	74,33% to 86,67%	13.28	10,46% to 16,53%	47.175
> 2.285	81.07	74,33% to 86,67%	13.48	10,64% to 16,74%	47.275
> 2.315	80.47	73,69% to 86,16%	13.48	10,64% to 16,74%	46.975
> 2.335	79.88	73,04% to 85,65%	13.48	10,64% to 16,74%	46.68
> 2.39	79.29	72,39% to 85,13%	13.48	10,64% to 16,74%	46.385
> 2.46	79.29	72,39% to 85,13%	13.67	10,82% to 16,96%	46.48
> 2.515	79.29	72,39% to 85,13%	13.87	10,99% to 17,17%	46.58
> 2.565	79.29	72,39% to 85,13%	14.06	11,17% to 17,38%	46.675
> 2.63	78.7	71,75% to 84,61%	14.06	11,17% to 17,38%	46.38
> 2.725	78.7	71,75% to 84,61%	14.26	11,35% to 17,59%	46.48
> 2.78	78.7	71,75% to 84,61%	14.45	11,52% to 17,8%	46.575
> 2.82	78.7	71,75% to 84,61%	14.65	11,7% to 18,01%	46.675
> 2.855	78.7	71,75% to 84,61%	14.84	11,88% to 18,22%	46.77
> 2.895	78.7	71,75% to 84,61%	15.23	12,23% to 18,64%	46.965
> 2.955	78.7	71,75% to 84,61%	15.43	12,41% to 18,85%	47.065
> 2.985	78.7	71,75% to 84,61%	15.63	12,59% to 19,06%	47.165
> 2.995	78.7	71,75% to 84,61%	15.82	12,77% to 19,27%	47.26
> 3.02	78.7	71,75% to 84,61%	16.21	13,12% to 19,69%	47.455
> 3.045	78.7	71,75% to 84,61%	16.41	13,3% to 19,9%	47.555
> 3.075	78.11	71,11% to 84,09%	16.41	13,3% to 19,9%	47.26
> 3.11	77.51	70,47% to 83,57%	16.41	13,3% to 19,9%	46.96
> 3.13	77.51	70,47% to 83,57%	16.6	13,48% to 20,11%	47.055
> 3.15	77.51	70,47% to 83,57%	16.8	13,66% to 20,32%	47.155
> 3.165	76.92	69,83% to 83,05%	16.8	13,66% to 20,32%	46.86
> 3.185	76.92	69,83% to 83,05%	16.99	13,84% to 20,53%	46.955
> 3.22	76.92	69,83% to 83,05%	17.19	14,02% to 20,74%	47.055
> 3.255	76.92	69,83% to 83,05%	17.38	14,2% to 20,95%	47.15
> 3.28	76.92	69,83% to 83,05%	17.58	14,38% to 21,16%	47.25
> 3.32	76.33	69,19% to 82,52%	17.58	14,38% to 21,16%	46.955
> 3.365	76.33	69,19% to 82,52%	17.97	14,74% to 21,57%	47.15
> 3.405	76.33	69,19% to 82,52%	18.16	14,92% to 21,78%	47.245
> 3.445	76.33	69,19% to 82,52%	18.36	15,1% to 21,99%	47.345
> 3.49	76.33	69,19% to 82,52%	18.55	15,28% to 22,2%	47.44
> 3.53	76.33	69,19% to 82,52%	18.75	15,46% to 22,41%	47.54
> 3.555	76.33	69,19% to 82,52%	18.95	15,64% to 22,61%	47.64
> 3.58	76.33	69,19% to 82,52%	19.14	15,82% to 22,82%	47.735
> 3.61	76.33	69,19% to 82,52%	19.34	16% to 23,03%	47.835
> 3.695	76.33	69,19% to 82,52%	19.53	16,18% to 23,23%	47.93
> 3.795	76.33	69,19% to 82,52%	19.73	16,37% to 23,44%	48.03
> 3.975	76.33	69,19% to 82,52%	19.92	16,55% to 23,65%	48.125
> 4.19	76.33	69,19% to 82,52%	20.12	16,73% to 23,86%	48.225
> 4.275	76.33	69,19% to 82,52%	20.31	16,91% to 24,06%	48.32
> 4.315	76.33	69,19% to 82,52%	20.51	17,09% to 24,27%	48.42
> 4.38	76.33	69,19% to 82,52%	20.7	17,27% to 24,48%	48.515
> 4.475	76.33	69,19% to 82,52%	20.9	17,46% to 24,68%	48.615
> 4.54	76.33	69,19% to 82,52%	21.09	17,64% to 24,89%	48.71
> 4.56	76.33	69,19% to 82,52%	21.29	17,82% to 25,09%	48.81
> 4.695	76.33	69,19% to 82,52%	21.48	18% to 25,3%	48.905
> 4.86	75.74	68,56% to 81,99%	21.48	18% to 25,3%	48.61
> 4.915	75.74	68,56% to 81,99%	21.68	18,18% to 25,51%	48.71
> 4.945	75.74	68,56% to 81,99%	21.88	18,37% to 25,71%	48.81
> 4.975	75.15	67,93% to 81,46%	21.88	18,37% to 25,71%	48.515
> 5.005	75.15	67,93% to 81,46%	22.07	18,55% to 25,92%	48.61
> 5.12	74.56	67,3% to 80,93%	22.07	18,55% to 25,92%	48.315
> 5.26	74.56	67,3% to 80,93%	22.46	18,92% to 26,33%	48.51
> 5.305	74.56	67,3% to 80,93%	22.66	19,1% to 26,53%	48.61
> 5.34	74.56	67,3% to 80,93%	22.85	19,28% to 26,74%	48.705
> 5.38	74.56	67,3% to 80,93%	23.05	19,47% to 26,94%	48.805
> 5.425	74.56	67,3% to 80,93%	23.24	19,65% to 27,15%	48.9
> 5.48	74.56	67,3% to 80,93%	23.44	19,83% to 27,35%	49
> 5.505	74.56	67,3% to 80,93%	23.63	20,02% to 27,56%	49.095
> 5.64	74.56	67,3% to 80,93%	23.83	20,2% to 27,76%	49.195
> 5.845	74.56	67,3% to 80,93%	24.02	20,38% to 27,97%	49.29
> 6	74.56	67,3% to 80,93%	24.22	20,57% to 28,17%	49.39
> 6.1	74.56	67,3% to 80,93%	24.41	20,75% to 28,37%	49.485
> 6.125	73.96	66,67% to 80,4%	24.41	20,75% to 28,37%	49.185
> 6.14	73.96	66,67% to 80,4%	24.61	20,94% to 28,58%	49.285
> 6.17	73.96	66,67% to 80,4%	24.8	21,12% to 28,78%	49.38
> 6.24	73.96	66,67% to 80,4%	25	21,31% to 28,99%	49.48
> 6.325	73.96	66,67% to 80,4%	25.2	21,49% to 29,19%	49.58
> 6.465	73.37	66,04% to 79,87%	25.2	21,49% to 29,19%	49.285
> 6.58	72.78	65,41% to 79,33%	25.2	21,49% to 29,19%	48.99
> 6.63	72.78	65,41% to 79,33%	25.39	21,67% to 29,39%	49.085
> 6.69	72.78	65,41% to 79,33%	25.59	21,86% to 29,6%	49.185
> 6.75	72.19	64,79% to 78,8%	25.59	21,86% to 29,6%	48.89
> 6.795	72.19	64,79% to 78,8%	25.78	22,04% to 29,8%	48.985
> 6.845	71.6	64,16% to 78,26%	25.78	22,04% to 29,8%	48.69
> 6.895	71.01	63,54% to 77,72%	25.78	22,04% to 29,8%	48.395
> 7.01	71.01	63,54% to 77,72%	25.98	22,23% to 30%	48.495
> 7.15	71.01	63,54% to 77,72%	26.17	22,41% to 30,21%	48.59
> 7.255	71.01	63,54% to 77,72%	26.37	22,6% to 30,41%	48.69
> 7.34	70.41	62,92% to 77,18%	26.37	22,6% to 30,41%	48.39
> 7.44	70.41	62,92% to 77,18%	26.56	22,78% to 30,61%	48.485
> 7.7	70.41	62,92% to 77,18%	26.76	22,97% to 30,82%	48.585
> 7.9	70.41	62,92% to 77,18%	26.95	23,15% to 31,02%	48.68
> 7.955	70.41	62,92% to 77,18%	27.15	23,34% to 31,22%	48.78
> 8.1	70.41	62,92% to 77,18%	27.54	23,71% to 31,63%	48.975
> 8.29	70.41	62,92% to 77,18%	27.73	23,9% to 31,83%	49.07
> 8.375	70.41	62,92% to 77,18%	27.93	24,08% to 32,03%	49.17
> 8.47	70.41	62,92% to 77,18%	28.13	24,27% to 32,24%	49.27
> 8.56	70.41	62,92% to 77,18%	28.32	24,45% to 32,44%	49.365
> 8.58	70.41	62,92% to 77,18%	28.52	24,64% to 32,64%	49.465
> 8.665	70.41	62,92% to 77,18%	28.71	24,83% to 32,84%	49.56
> 8.78	70.41	62,92% to 77,18%	28.91	25,01% to 33,04%	49.66
> 8.87	70.41	62,92% to 77,18%	29.3	25,39% to 33,45%	49.855
> 8.955	70.41	62,92% to 77,18%	29.49	25,57% to 33,65%	49.95
> 9.04	70.41	62,92% to 77,18%	29.69	25,76% to 33,85%	50.05
> 9.24	70.41	62,92% to 77,18%	29.88	25,95% to 34,05%	50.145
> 9.57	70.41	62,92% to 77,18%	30.08	26,13% to 34,26%	50.245
> 9.76	70.41	62,92% to 77,18%	30.27	26,32% to 34,46%	50.34
> 9.825	69.82	62,3% to 76,63%	30.27	26,32% to 34,46%	50.045
> 9.91	69.82	62,3% to 76,63%	30.47	26,51% to 34,66%	50.145
> 9.95	69.23	61,68% to 76,09%	30.47	26,51% to 34,66%	49.85
> 9.985	69.23	61,68% to 76,09%	30.66	26,69% to 34,86%	49.945
> 10.07	69.23	61,68% to 76,09%	30.86	26,88% to 35,06%	50.045
> 10.23	68.64	61,07% to 75,55%	30.86	26,88% to 35,06%	49.75
> 10.37	68.64	61,07% to 75,55%	31.05	27,07% to 35,26%	49.845
> 10.42	68.64	61,07% to 75,55%	31.25	27,26% to 35,46%	49.945
> 10.44	68.64	61,07% to 75,55%	31.45	27,44% to 35,66%	50.045
> 10.47	68.05	60,45% to 75%	31.45	27,44% to 35,66%	49.75
> 10.52	67.46	59,83% to 74,45%	31.45	27,44% to 35,66%	49.455
> 10.58	66.86	59,22% to 73,9%	31.45	27,44% to 35,66%	49.155
> 10.75	66.86	59,22% to 73,9%	31.64	27,63% to 35,86%	49.25
> 10.89	66.86	59,22% to 73,9%	31.84	27,82% to 36,06%	49.35
> 10.92	66.86	59,22% to 73,9%	32.03	28,01% to 36,27%	49.445
> 10.95	66.86	59,22% to 73,9%	32.23	28,19% to 36,47%	49.545
> 11.09	66.86	59,22% to 73,9%	32.62	28,57% to 36,87%	49.74
> 11.22	66.86	59,22% to 73,9%	32.81	28,76% to 37,07%	49.835
> 11.24	66.86	59,22% to 73,9%	33.01	28,95% to 37,27%	49.935
> 11.35	66.86	59,22% to 73,9%	33.2	29,13% to 37,47%	50.03
> 11.47	66.86	59,22% to 73,9%	33.4	29,32% to 37,67%	50.13
> 11.5	66.27	58,61% to 73,35%	33.4	29,32% to 37,67%	49.835
> 11.51	66.27	58,61% to 73,35%	33.59	29,51% to 37,87%	49.93
> 11.57	66.27	58,61% to 73,35%	33.79	29,7% to 38,07%	50.03
> 11.73	66.27	58,61% to 73,35%	33.98	29,89% to 38,27%	50.125
> 11.85	66.27	58,61% to 73,35%	34.18	30,08% to 38,47%	50.225
> 12.04	66.27	58,61% to 73,35%	34.38	30,26% to 38,67%	50.325
> 12.28	66.27	58,61% to 73,35%	34.57	30,45% to 38,87%	50.42
> 12.38	65.68	58% to 72,8%	34.57	30,45% to 38,87%	50.125
> 12.45	65.68	58% to 72,8%	34.77	30,64% to 39,07%	50.225
> 12.56	65.68	58% to 72,8%	35.16	31,02% to 39,47%	50.42
> 12.67	65.68	58% to 72,8%	35.35	31,21% to 39,67%	50.515
> 12.74	65.09	57,39% to 72,25%	35.35	31,21% to 39,67%	50.22
> 12.78	65.09	57,39% to 72,25%	35.74	31,59% to 40,06%	50.415
> 12.81	64.5	56,78% to 71,69%	35.74	31,59% to 40,06%	50.12
> 12.83	64.5	56,78% to 71,69%	35.94	31,78% to 40,26%	50.22
> 12.94	64.5	56,78% to 71,69%	36.13	31,96% to 40,46%	50.315
> 13.11	64.5	56,78% to 71,69%	36.33	32,15% to 40,66%	50.415
> 13.25	64.5	56,78% to 71,69%	36.52	32,34% to 40,86%	50.51
> 13.47	64.5	56,78% to 71,69%	36.72	32,53% to 41,06%	50.61
> 13.64	63.91	56,17% to 71,14%	36.91	32,72% to 41,26%	50.41
> 13.7	63.91	56,17% to 71,14%	37.11	32,91% to 41,46%	50.51
> 13.73	63.91	56,17% to 71,14%	37.3	33,1% to 41,66%	50.605
> 13.76	63.31	55,57% to 70,58%	37.3	33,1% to 41,66%	50.305
> 13.83	63.31	55,57% to 70,58%	37.5	33,29% to 41,85%	50.405
> 13.95	63.31	55,57% to 70,58%	37.7	33,48% to 42,05%	50.505
> 14.03	63.31	55,57% to 70,58%	37.89	33,67% to 42,25%	50.6
> 14.06	62.72	54,96% to 70,03%	37.89	33,67% to 42,25%	50.305
> 14.15	62.72	54,96% to 70,03%	38.09	33,86% to 42,45%	50.405
> 14.26	62.72	54,96% to 70,03%	38.28	34,05% to 42,65%	50.5
> 14.42	62.72	54,96% to 70,03%	38.48	34,24% to 42,85%	50.6
> 14.62	62.72	54,96% to 70,03%	38.67	34,43% to 43,04%	50.695
> 14.75	62.72	54,96% to 70,03%	38.87	34,62% to 43,24%	50.795
> 14.8	62.72	54,96% to 70,03%	39.06	34,81% to 43,44%	50.89
> 14.84	62.72	54,96% to 70,03%	39.26	35% to 43,64%	50.99
> 14.96	62.13	54,36% to 69,47%	39.26	35% to 43,64%	50.695
> 15.14	62.13	54,36% to 69,47%	39.45	35,19% to 43,84%	50.79
> 15.26	61.54	53,76% to 68,91%	39.45	35,19% to 43,84%	50.495
> 15.32	60.95	53,16% to 68,35%	39.45	35,19% to 43,84%	50.2
> 15.37	60.36	52,56% to 67,78%	39.45	35,19% to 43,84%	49.905
> 15.45	60.36	52,56% to 67,78%	39.65	35,38% to 44,03%	50.005
> 15.55	60.36	52,56% to 67,78%	39.84	35,57% to 44,23%	50.1
> 15.59	60.36	52,56% to 67,78%	40.23	35,96% to 44,63%	50.295
> 15.62	60.36	52,56% to 67,78%	40.43	36,15% to 44,82%	50.395
> 15.73	59.76	51,96% to 67,22%	40.63	36,34% to 45,02%	50.195
> 15.88	59.76	51,96% to 67,22%	40.82	36,53% to 45,22%	50.29
> 15.99	59.76	51,96% to 67,22%	41.02	36,72% to 45,42%	50.39
> 16.04	59.76	51,96% to 67,22%	41.21	36,91% to 45,61%	50.485
> 16.09	59.76	51,96% to 67,22%	41.41	37,1% to 45,81%	50.585
> 16.13	59.76	51,96% to 67,22%	41.6	37,29% to 46,01%	50.68
> 16.17	59.76	51,96% to 67,22%	41.8	37,49% to 46,2%	50.78
> 16.29	59.76	51,96% to 67,22%	41.99	37,68% to 46,4%	50.875
> 16.38	59.76	51,96% to 67,22%	42.19	37,87% to 46,6%	50.975
> 16.39	59.76	51,96% to 67,22%	42.38	38,06% to 46,79%	51.07
> 16.42	59.76	51,96% to 67,22%	42.58	38,25% to 46,99%	51.17
> 16.45	59.76	51,96% to 67,22%	42.77	38,44% to 47,19%	51.265
> 16.48	59.17	51,36% to 66,66%	42.77	38,44% to 47,19%	50.97
> 16.6	58.58	50,76% to 66,09%	42.77	38,44% to 47,19%	50.675
> 16.73	58.58	50,76% to 66,09%	42.97	38,63% to 47,38%	50.775
> 16.84	58.58	50,76% to 66,09%	43.16	38,83% to 47,58%	50.87
> 16.93	58.58	50,76% to 66,09%	43.36	39,02% to 47,78%	50.97
> 16.98	57.99	50,17% to 65,53%	43.36	39,02% to 47,78%	50.675
> 17.1	57.4	49,57% to 64,96%	43.36	39,02% to 47,78%	50.38
> 17.29	57.4	49,57% to 64,96%	43.55	39,21% to 47,97%	50.475
> 17.43	57.4	49,57% to 64,96%	43.75	39,4% to 48,17%	50.575
> 17.44	57.4	49,57% to 64,96%	43.95	39,59% to 48,37%	50.675
> 17.45	57.4	49,57% to 64,96%	44.14	39,79% to 48,56%	50.77
> 17.54	57.4	49,57% to 64,96%	44.34	39,98% to 48,76%	50.87
> 17.66	57.4	49,57% to 64,96%	44.53	40,17% to 48,95%	50.965
> 17.71	57.4	49,57% to 64,96%	44.73	40,36% to 49,15%	51.065
> 17.97	57.4	49,57% to 64,96%	44.92	40,56% to 49,35%	51.16
> 18.32	57.4	49,57% to 64,96%	45.12	40,75% to 49,54%	51.26
> 18.42	57.4	49,57% to 64,96%	45.31	40,94% to 49,74%	51.355
> 18.45	57.4	49,57% to 64,96%	45.51	41,13% to 49,93%	51.455
> 18.48	56.8	48,98% to 64,39%	45.51	41,13% to 49,93%	51.155
> 18.62	56.8	48,98% to 64,39%	45.7	41,33% to 50,13%	51.25
> 18.75	56.8	48,98% to 64,39%	45.9	41,52% to 50,33%	51.35
> 18.86	56.8	48,98% to 64,39%	46.09	41,71% to 50,52%	51.445
> 18.99	56.8	48,98% to 64,39%	46.29	41,9% to 50,72%	51.545
> 19.07	56.8	48,98% to 64,39%	46.48	42,1% to 50,91%	51.64
> 19.18	56.8	48,98% to 64,39%	46.68	42,29% to 51,11%	51.74
> 19.31	56.8	48,98% to 64,39%	46.88	42,48% to 51,3%	51.84
> 19.49	56.21	48,38% to 63,82%	46.88	42,48% to 51,3%	51.545
> 19.7	56.21	48,38% to 63,82%	47.07	42,68% to 51,5%	51.64
> 19.83	56.21	48,38% to 63,82%	47.27	42,87% to 51,69%	51.74
> 19.97	56.21	48,38% to 63,82%	47.46	43,06% to 51,89%	51.835
> 20.1	56.21	48,38% to 63,82%	47.66	43,26% to 52,08%	51.935
> 20.18	56.21	48,38% to 63,82%	47.85	43,45% to 52,28%	52.03
> 20.25	56.21	48,38% to 63,82%	48.05	43,64% to 52,47%	52.13
> 20.34	56.21	48,38% to 63,82%	48.24	43,84% to 52,67%	52.225
> 20.63	56.21	48,38% to 63,82%	48.44	44,03% to 52,86%	52.325
> 20.94	55.62	47,79% to 63,25%	48.44	44,03% to 52,86%	52.03
> 21.04	55.62	47,79% to 63,25%	48.63	44,22% to 53,06%	52.125
> 21.13	55.62	47,79% to 63,25%	48.83	44,42% to 53,25%	52.225
> 21.24	55.62	47,79% to 63,25%	49.02	44,61% to 53,45%	52.32
> 21.28	55.62	47,79% to 63,25%	49.22	44,81% to 53,64%	52.42
> 21.39	55.62	47,79% to 63,25%	49.41	45% to 53,83%	52.515
> 21.57	55.03	47,2% to 62,68%	49.41	45% to 53,83%	52.22
> 21.73	55.03	47,2% to 62,68%	49.61	45,19% to 54,03%	52.32
> 21.94	55.03	47,2% to 62,68%	49.8	45,39% to 54,22%	52.415
> 22.12	55.03	47,2% to 62,68%	50	45,58% to 54,42%	52.515
> 22.28	55.03	47,2% to 62,68%	50.2	45,78% to 54,61%	52.615
> 22.44	55.03	47,2% to 62,68%	50.39	45,97% to 54,81%	52.71
> 22.54	55.03	47,2% to 62,68%	50.59	46,17% to 55%	52.81
> 22.63	55.03	47,2% to 62,68%	50.78	46,36% to 55,19%	52.905
> 22.7	55.03	47,2% to 62,68%	50.98	46,55% to 55,39%	53.005
> 22.75	55.03	47,2% to 62,68%	51.17	46,75% to 55,58%	53.1
> 22.81	54.44	46,61% to 62,1%	51.17	46,75% to 55,58%	52.805
> 22.92	54.44	46,61% to 62,1%	51.37	46,94% to 55,78%	52.905
> 23.15	54.44	46,61% to 62,1%	51.56	47,14% to 55,97%	53
> 23.34	54.44	46,61% to 62,1%	51.76	47,33% to 56,16%	53.1
> 23.37	53.85	46,02% to 61,53%	51.95	47,53% to 56,36%	52.9
> 23.46	53.85	46,02% to 61,53%	52.15	47,72% to 56,55%	53
> 23.6	53.85	46,02% to 61,53%	52.34	47,92% to 56,74%	53.095
> 23.72	53.85	46,02% to 61,53%	52.54	48,11% to 56,94%	53.195
> 23.82	53.85	46,02% to 61,53%	52.73	48,31% to 57,13%	53.29
> 23.92	53.25	45,44% to 60,96%	52.93	48,5% to 57,32%	53.09
> 24.03	52.66	44,85% to 60,38%	52.93	48,5% to 57,32%	52.795
> 24.11	52.66	44,85% to 60,38%	53.13	48,7% to 57,52%	52.895
> 24.21	52.07	44,27% to 59,8%	53.13	48,7% to 57,52%	52.6
> 24.33	52.07	44,27% to 59,8%	53.32	48,89% to 57,71%	52.695
> 24.44	52.07	44,27% to 59,8%	53.52	49,09% to 57,9%	52.795
> 24.56	52.07	44,27% to 59,8%	53.71	49,28% to 58,1%	52.89
> 24.62	52.07	44,27% to 59,8%	53.91	49,48% to 58,29%	52.99
> 24.69	51.48	43,68% to 59,23%	53.91	49,48% to 58,29%	52.695
> 24.77	51.48	43,68% to 59,23%	54.1	49,67% to 58,48%	52.79
> 24.78	51.48	43,68% to 59,23%	54.3	49,87% to 58,67%	52.89
> 24.82	51.48	43,68% to 59,23%	54.49	50,07% to 58,87%	52.985
> 24.93	51.48	43,68% to 59,23%	54.69	50,26% to 59,06%	53.085
> 25.07	51.48	43,68% to 59,23%	54.88	50,46% to 59,25%	53.18
> 25.2	51.48	43,68% to 59,23%	55.08	50,65% to 59,44%	53.28
> 25.3	51.48	43,68% to 59,23%	55.27	50,85% to 59,64%	53.375
> 25.36	51.48	43,68% to 59,23%	55.47	51,05% to 59,83%	53.475
> 25.66	51.48	43,68% to 59,23%	55.66	51,24% to 60,02%	53.57
> 26.09	51.48	43,68% to 59,23%	55.86	51,44% to 60,21%	53.67
> 26.25	51.48	43,68% to 59,23%	56.05	51,63% to 60,41%	53.765
> 26.31	50.89	43,1% to 58,65%	56.05	51,63% to 60,41%	53.47
> 26.39	50.89	43,1% to 58,65%	56.25	51,83% to 60,6%	53.57
> 26.49	50.89	43,1% to 58,65%	56.45	52,03% to 60,79%	53.67
> 26.74	50.89	43,1% to 58,65%	56.64	52,22% to 60,98%	53.765
> 27.09	50.89	43,1% to 58,65%	56.84	52,42% to 61,17%	53.865
> 27.31	50.3	42,52% to 58,07%	56.84	52,42% to 61,17%	53.57
> 27.41	50.3	42,52% to 58,07%	57.03	52,62% to 61,37%	53.665
> 27.47	49.7	41,93% to 57,48%	57.03	52,62% to 61,37%	53.365
> 27.49	49.11	41,35% to 56,9%	57.03	52,62% to 61,37%	53.07
> 27.51	49.11	41,35% to 56,9%	57.23	52,81% to 61,56%	53.17
> 27.56	49.11	41,35% to 56,9%	57.42	53,01% to 61,75%	53.265
> 27.61	49.11	41,35% to 56,9%	57.62	53,21% to 61,94%	53.365
> 27.66	48.52	40,77% to 56,32%	57.62	53,21% to 61,94%	53.07
> 27.75	48.52	40,77% to 56,32%	57.81	53,4% to 62,13%	53.165
> 27.9	48.52	40,77% to 56,32%	58.01	53,6% to 62,32%	53.265
> 28.09	48.52	40,77% to 56,32%	58.2	53,8% to 62,51%	53.36
> 28.22	48.52	40,77% to 56,32%	58.4	53,99% to 62,71%	53.46
> 28.46	47.93	40,2% to 55,73%	58.4	53,99% to 62,71%	53.165
> 28.71	47.34	39,62% to 55,15%	58.4	53,99% to 62,71%	52.87
> 28.81	47.34	39,62% to 55,15%	58.59	54,19% to 62,9%	52.965
> 28.89	47.34	39,62% to 55,15%	58.79	54,39% to 63,09%	53.065
> 28.93	46.75	39,04% to 54,56%	58.79	54,39% to 63,09%	52.77
> 28.96	46.75	39,04% to 54,56%	58.98	54,58% to 63,28%	52.865
> 29.04	46.75	39,04% to 54,56%	59.18	54,78% to 63,47%	52.965
> 29.14	46.15	38,47% to 53,98%	59.18	54,78% to 63,47%	52.665
> 29.29	46.15	38,47% to 53,98%	59.38	54,98% to 63,66%	52.765
> 29.42	46.15	38,47% to 53,98%	59.57	55,18% to 63,85%	52.86
> 29.45	46.15	38,47% to 53,98%	59.77	55,37% to 64,04%	52.96
> 29.79	46.15	38,47% to 53,98%	59.96	55,57% to 64,23%	53.055
> 30.12	46.15	38,47% to 53,98%	60.16	55,77% to 64,43%	53.155
> 30.13	45.56	37,9% to 53,39%	60.16	55,77% to 64,43%	52.86
> 30.35	45.56	37,9% to 53,39%	60.35	55,97% to 64,62%	52.955
> 30.7	45.56	37,9% to 53,39%	60.55	56,16% to 64,81%	53.055
> 31.01	45.56	37,9% to 53,39%	60.94	56,56% to 65,19%	53.25
> 31.19	45.56	37,9% to 53,39%	61.13	56,76% to 65,38%	53.345
> 31.26	45.56	37,9% to 53,39%	61.33	56,96% to 65,57%	53.445
> 31.61	45.56	37,9% to 53,39%	61.52	57,15% to 65,76%	53.54
> 32	45.56	37,9% to 53,39%	61.72	57,35% to 65,95%	53.64
> 32.11	45.56	37,9% to 53,39%	61.91	57,55% to 66,14%	53.735
> 32.17	45.56	37,9% to 53,39%	62.11	57,75% to 66,33%	53.835
> 32.25	45.56	37,9% to 53,39%	62.3	57,95% to 66,52%	53.93
> 32.48	45.56	37,9% to 53,39%	62.5	58,15% to 66,71%	54.03
> 32.77	44.97	37,32% to 52,8%	62.5	58,15% to 66,71%	53.735
> 32.91	44.97	37,32% to 52,8%	62.7	58,34% to 66,9%	53.835
> 33.03	44.38	36,75% to 52,21%	62.7	58,34% to 66,9%	53.54
> 33.21	44.38	36,75% to 52,21%	62.89	58,54% to 67,09%	53.635
> 33.34	43.79	36,18% to 51,62%	62.89	58,54% to 67,09%	53.34
> 33.53	43.79	36,18% to 51,62%	63.09	58,74% to 67,28%	53.44
> 33.72	43.2	35,61% to 51,02%	63.09	58,74% to 67,28%	53.145
> 33.94	43.2	35,61% to 51,02%	63.28	58,94% to 67,47%	53.24
> 34.16	43.2	35,61% to 51,02%	63.48	59,14% to 67,66%	53.34
> 34.23	43.2	35,61% to 51,02%	63.67	59,34% to 67,85%	53.435
> 34.32	43.2	35,61% to 51,02%	63.87	59,54% to 68,04%	53.535
> 34.43	43.2	35,61% to 51,02%	64.06	59,74% to 68,22%	53.63
> 34.53	43.2	35,61% to 51,02%	64.26	59,94% to 68,41%	53.73
> 34.61	42.6	35,04% to 50,43%	64.26	59,94% to 68,41%	53.43
> 34.72	42.6	35,04% to 50,43%	64.45	60,14% to 68,6%	53.525
> 34.83	42.6	35,04% to 50,43%	64.65	60,33% to 68,79%	53.625
> 34.94	42.6	35,04% to 50,43%	64.84	60,53% to 68,98%	53.72
> 35.18	42.01	34,47% to 49,83%	64.84	60,53% to 68,98%	53.425
> 35.6	41.42	33,91% to 49,24%	64.84	60,53% to 68,98%	53.13
> 36.04	40.83	33,34% to 48,64%	64.84	60,53% to 68,98%	52.835
> 36.23	40.24	32,78% to 48,04%	65.23	60,93% to 69,36%	52.735
> 36.29	40.24	32,78% to 48,04%	65.43	61,13% to 69,55%	52.835
> 36.42	40.24	32,78% to 48,04%	65.63	61,33% to 69,74%	52.935
> 36.58	39.64	32,22% to 47,44%	65.63	61,33% to 69,74%	52.635
> 36.68	39.64	32,22% to 47,44%	65.82	61,53% to 69,92%	52.73
> 36.7	39.64	32,22% to 47,44%	66.02	61,73% to 70,11%	52.83
> 36.78	39.64	32,22% to 47,44%	66.21	61,93% to 70,3%	52.925
> 36.86	39.05	31,65% to 46,84%	66.21	61,93% to 70,3%	52.63
> 36.99	39.05	31,65% to 46,84%	66.41	62,13% to 70,49%	52.73
> 37.19	39.05	31,65% to 46,84%	66.6	62,33% to 70,68%	52.825
> 37.32	38.46	31,09% to 46,24%	66.6	62,33% to 70,68%	52.53
> 37.39	37.87	30,53% to 45,64%	66.6	62,33% to 70,68%	52.235
> 37.54	37.87	30,53% to 45,64%	66.8	62,53% to 70,87%	52.335
> 37.67	37.28	29,97% to 45,04%	66.8	62,53% to 70,87%	52.04
> 37.73	37.28	29,97% to 45,04%	66.99	62,73% to 71,05%	52.135
> 37.81	37.28	29,97% to 45,04%	67.19	62,93% to 71,24%	52.235
> 37.88	37.28	29,97% to 45,04%	67.58	63,33% to 71,62%	52.43
> 37.97	36.69	29,42% to 44,43%	67.58	63,33% to 71,62%	52.135
> 38.02	36.69	29,42% to 44,43%	67.77	63,53% to 71,81%	52.23
> 38.19	36.69	29,42% to 44,43%	67.97	63,73% to 71,99%	52.33
> 38.57	36.69	29,42% to 44,43%	68.16	63,94% to 72,18%	52.425
> 38.85	36.69	29,42% to 44,43%	68.36	64,14% to 72,37%	52.525
> 39.06	36.69	29,42% to 44,43%	68.55	64,34% to 72,56%	52.62
> 39.33	36.69	29,42% to 44,43%	68.75	64,54% to 72,74%	52.72
> 39.49	36.69	29,42% to 44,43%	68.95	64,74% to 72,93%	52.82
> 39.72	36.69	29,42% to 44,43%	69.14	64,94% to 73,12%	52.915
> 39.92	36.69	29,42% to 44,43%	69.34	65,14% to 73,31%	53.015
> 40.15	36.69	29,42% to 44,43%	69.53	65,34% to 73,49%	53.11
> 40.5	36.69	29,42% to 44,43%	69.73	65,54% to 73,68%	53.21
> 40.7	36.69	29,42% to 44,43%	69.92	65,74% to 73,87%	53.305
> 40.78	36.69	29,42% to 44,43%	70.12	65,95% to 74,05%	53.405
> 40.91	36.69	29,42% to 44,43%	70.31	66,15% to 74,24%	53.5
> 41.06	36.69	29,42% to 44,43%	70.51	66,35% to 74,43%	53.6
> 41.39	36.69	29,42% to 44,43%	70.7	66,55% to 74,61%	53.695
> 41.8	36.69	29,42% to 44,43%	70.9	66,75% to 74,8%	53.795
> 42	36.69	29,42% to 44,43%	71.09	66,96% to 74,99%	53.89
> 42.08	36.09	28,86% to 43,83%	71.09	66,96% to 74,99%	53.59
> 42.29	35.5	28,31% to 43,22%	71.09	66,96% to 74,99%	53.295
> 42.51	35.5	28,31% to 43,22%	71.29	67,16% to 75,17%	53.395
> 42.7	35.5	28,31% to 43,22%	71.68	67,56% to 75,55%	53.59
> 42.98	34.91	27,75% to 42,61%	71.68	67,56% to 75,55%	53.295
> 43.15	34.91	27,75% to 42,61%	71.88	67,76% to 75,73%	53.395
> 43.36	34.91	27,75% to 42,61%	72.07	67,97% to 75,92%	53.49
> 43.49	34.91	27,75% to 42,61%	72.27	68,17% to 76,1%	53.59
> 43.59	34.32	27,2% to 42%	72.27	68,17% to 76,1%	53.295
> 43.77	34.32	27,2% to 42%	72.46	68,37% to 76,29%	53.39
> 43.95	34.32	27,2% to 42%	72.66	68,57% to 76,47%	53.49
> 44.06	33.73	26,65% to 41,39%	72.66	68,57% to 76,47%	53.195
> 44.11	33.14	26,1% to 40,78%	72.66	68,57% to 76,47%	52.9
> 44.22	33.14	26,1% to 40,78%	72.85	68,78% to 76,66%	52.995
> 44.4	32.54	25,55% to 40,17%	72.85	68,78% to 76,66%	52.695
> 44.55	31.95	25% to 39,55%	72.85	68,78% to 76,66%	52.4
> 44.76	31.95	25% to 39,55%	73.05	68,98% to 76,85%	52.5
> 45.05	31.95	25% to 39,55%	73.24	69,18% to 77,03%	52.595
> 45.28	31.95	25% to 39,55%	73.44	69,39% to 77,22%	52.695
> 45.47	31.36	24,45% to 38,93%	73.44	69,39% to 77,22%	52.4
> 45.76	31.36	24,45% to 38,93%	73.63	69,59% to 77,4%	52.495
> 45.98	30.77	23,91% to 38,32%	73.63	69,59% to 77,4%	52.2
> 46.06	30.18	23,37% to 37,7%	73.63	69,59% to 77,4%	51.905
> 46.23	30.18	23,37% to 37,7%	74.02	70% to 77,77%	52.1
> 46.46	30.18	23,37% to 37,7%	74.22	70,2% to 77,96%	52.2
> 46.6	30.18	23,37% to 37,7%	74.61	70,61% to 78,33%	52.395
> 46.87	30.18	23,37% to 37,7%	74.8	70,81% to 78,51%	52.49
> 47.4	30.18	23,37% to 37,7%	75	71,01% to 78,69%	52.59
> 47.99	29.59	22,82% to 37,08%	75	71,01% to 78,69%	52.295
> 48.34	28.99	22,28% to 36,46%	75	71,01% to 78,69%	51.995
> 48.41	28.99	22,28% to 36,46%	75.2	71,22% to 78,88%	52.095
> 48.46	28.99	22,28% to 36,46%	75.39	71,42% to 79,06%	52.19
> 48.62	28.99	22,28% to 36,46%	75.59	71,63% to 79,25%	52.29
> 48.85	28.99	22,28% to 36,46%	75.78	71,83% to 79,43%	52.385
> 49.03	28.99	22,28% to 36,46%	75.98	72,03% to 79,62%	52.485
> 49.13	28.99	22,28% to 36,46%	76.17	72,24% to 79,8%	52.58
> 49.29	28.99	22,28% to 36,46%	76.37	72,44% to 79,98%	52.68
> 49.6	28.99	22,28% to 36,46%	76.56	72,65% to 80,17%	52.775
> 49.94	28.99	22,28% to 36,46%	76.76	72,85% to 80,35%	52.875
> 50.22	28.99	22,28% to 36,46%	76.95	73,06% to 80,53%	52.97
> 50.61	28.4	21,74% to 35,84%	76.95	73,06% to 80,53%	52.675
> 50.9	28.4	21,74% to 35,84%	77.15	73,26% to 80,72%	52.775
> 50.92	28.4	21,74% to 35,84%	77.34	73,47% to 80,9%	52.87
> 50.97	28.4	21,74% to 35,84%	77.54	73,67% to 81,08%	52.97
> 51.14	28.4	21,74% to 35,84%	77.73	73,88% to 81,27%	53.065
> 51.26	28.4	21,74% to 35,84%	77.93	74,08% to 81,45%	53.165
> 51.36	27.81	21,2% to 35,21%	77.93	74,08% to 81,45%	52.87
> 51.5	27.81	21,2% to 35,21%	78.13	74,29% to 81,63%	52.97
> 51.56	27.81	21,2% to 35,21%	78.32	74,49% to 81,82%	53.065
> 51.71	27.81	21,2% to 35,21%	78.52	74,7% to 82%	53.165
> 52.05	27.81	21,2% to 35,21%	78.71	74,91% to 82,18%	53.26
> 52.28	27.81	21,2% to 35,21%	78.91	75,11% to 82,36%	53.36
> 52.37	27.22	20,67% to 34,59%	78.91	75,11% to 82,36%	53.065
> 52.71	27.22	20,67% to 34,59%	79.1	75,32% to 82,54%	53.16
> 53.07	27.22	20,67% to 34,59%	79.3	75,52% to 82,73%	53.26
> 53.36	26.63	20,13% to 33,96%	79.3	75,52% to 82,73%	52.965
> 53.81	26.63	20,13% to 33,96%	79.49	75,73% to 82,91%	53.06
> 54.06	26.04	19,6% to 33,33%	79.49	75,73% to 82,91%	52.765
> 54.23	25.44	19,07% to 32,7%	79.49	75,73% to 82,91%	52.465
> 54.43	25.44	19,07% to 32,7%	79.69	75,94% to 83,09%	52.565
> 54.95	24.85	18,54% to 32,07%	79.69	75,94% to 83,09%	52.27
> 55.54	24.26	18,01% to 31,44%	79.69	75,94% to 83,09%	51.975
> 55.99	24.26	18,01% to 31,44%	79.88	76,14% to 83,27%	52.07
> 56.65	24.26	18,01% to 31,44%	80.08	76,35% to 83,45%	52.17
> 56.97	24.26	18,01% to 31,44%	80.27	76,56% to 83,63%	52.265
> 57.17	23.67	17,48% to 30,81%	80.27	76,56% to 83,63%	51.97
> 57.61	23.67	17,48% to 30,81%	80.47	76,77% to 83,82%	52.07
> 57.88	23.67	17,48% to 30,81%	80.66	76,97% to 84%	52.165
> 58	23.67	17,48% to 30,81%	80.86	77,18% to 84,18%	52.265
> 58.1	23.08	16,95% to 30,17%	81.05	77,39% to 84,36%	52.065
> 58.14	22.49	16,43% to 29,53%	81.05	77,39% to 84,36%	51.77
> 58.66	21.89	15,91% to 28,89%	81.05	77,39% to 84,36%	51.47
> 59.2	21.89	15,91% to 28,89%	81.25	77,59% to 84,54%	51.57
> 59.31	21.3	15,39% to 28,25%	81.25	77,59% to 84,54%	51.275
> 59.47	21.3	15,39% to 28,25%	81.45	77,8% to 84,72%	51.375
> 59.73	21.3	15,39% to 28,25%	81.64	78,01% to 84,9%	51.47
> 60.46	21.3	15,39% to 28,25%	81.84	78,22% to 85,08%	51.57
> 61.06	21.3	15,39% to 28,25%	82.03	78,43% to 85,26%	51.665
> 61.13	21.3	15,39% to 28,25%	82.23	78,63% to 85,44%	51.765
> 61.24	20.71	14,87% to 27,61%	82.23	78,63% to 85,44%	51.47
> 61.33	20.12	14,35% to 26,96%	82.23	78,63% to 85,44%	51.175
> 61.43	19.53	13,84% to 26,31%	82.23	78,63% to 85,44%	50.88
> 61.57	19.53	13,84% to 26,31%	82.42	78,84% to 85,62%	50.975
> 62.08	18.93	13,33% to 25,67%	82.42	78,84% to 85,62%	50.675
> 62.54	18.93	13,33% to 25,67%	82.62	79,05% to 85,8%	50.775
> 62.56	18.34	12,82% to 25,01%	82.62	79,05% to 85,8%	50.48
> 62.9	18.34	12,82% to 25,01%	82.81	79,26% to 85,98%	50.575
> 64.03	17.75	12,31% to 24,36%	82.81	79,26% to 85,98%	50.28
> 64.98	17.75	12,31% to 24,36%	83.01	79,47% to 86,16%	50.38
> 65.13	17.75	12,31% to 24,36%	83.2	79,68% to 86,34%	50.475
> 65.15	17.75	12,31% to 24,36%	83.4	79,89% to 86,52%	50.575
> 65.21	17.16	11,8% to 23,71%	83.4	79,89% to 86,52%	50.28
> 65.32	17.16	11,8% to 23,71%	83.59	80,1% to 86,7%	50.375
> 65.51	17.16	11,8% to 23,71%	83.79	80,31% to 86,88%	50.475
> 65.83	17.16	11,8% to 23,71%	83.98	80,52% to 87,05%	50.57
> 66.16	17.16	11,8% to 23,71%	84.18	80,73% to 87,23%	50.67
> 66.36	16.57	11,3% to 23,05%	84.18	80,73% to 87,23%	50.375
> 66.56	15.98	10,8% to 22,39%	84.18	80,73% to 87,23%	50.08
> 66.78	15.98	10,8% to 22,39%	84.38	80,94% to 87,41%	50.18
> 66.92	15.98	10,8% to 22,39%	84.57	81,15% to 87,59%	50.275
> 67.27	15.98	10,8% to 22,39%	84.77	81,36% to 87,77%	50.375
> 67.73	15.98	10,8% to 22,39%	84.96	81,57% to 87,95%	50.47
> 67.9	15.38	10,3% to 21,72%	85.16	81,78% to 88,12%	50.27
> 68.08	14.79	9,808% to 21,06%	85.16	81,78% to 88,12%	49.975
> 68.3	14.79	9,808% to 21,06%	85.35	81,99% to 88,3%	50.07
> 68.43	14.2	9,316% to 20,39%	85.35	81,99% to 88,3%	49.775
> 68.81	14.2	9,316% to 20,39%	85.55	82,2% to 88,48%	49.875
> 69.15	14.2	9,316% to 20,39%	85.74	82,41% to 88,65%	49.97
> 69.5	13.61	8,827% to 19,72%	85.74	82,41% to 88,65%	49.675
> 69.91	13.61	8,827% to 19,72%	85.94	82,62% to 88,83%	49.775
> 70.56	13.02	8,341% to 19,04%	85.94	82,62% to 88,83%	49.48
> 71.32	13.02	8,341% to 19,04%	86.13	82,83% to 89,01%	49.575
> 71.57	13.02	8,341% to 19,04%	86.33	83,04% to 89,18%	49.675
> 71.86	13.02	8,341% to 19,04%	86.52	83,26% to 89,36%	49.77
> 72.24	13.02	8,341% to 19,04%	86.72	83,47% to 89,54%	49.87
> 72.83	13.02	8,341% to 19,04%	86.91	83,68% to 89,71%	49.965
> 73.62	12.43	7,859% to 18,37%	86.91	83,68% to 89,71%	49.67
> 74.26	12.43	7,859% to 18,37%	87.11	83,89% to 89,89%	49.77
> 74.77	12.43	7,859% to 18,37%	87.3	84,11% to 90,06%	49.865
> 75.98	12.43	7,859% to 18,37%	87.5	84,32% to 90,24%	49.965
> 77.49	12.43	7,859% to 18,37%	87.7	84,53% to 90,41%	50.065
> 78	12.43	7,859% to 18,37%	87.89	84,75% to 90,59%	50.16
> 78.39	11.83	7,381% to 17,68%	87.89	84,75% to 90,59%	49.86
> 79.01	11.83	7,381% to 17,68%	88.09	84,96% to 90,76%	49.96
> 79.33	11.24	6,906% to 17%	88.09	84,96% to 90,76%	49.665
> 79.51	11.24	6,906% to 17%	88.28	85,17% to 90,94%	49.76
> 79.64	11.24	6,906% to 17%	88.48	85,39% to 91,11%	49.86
> 79.92	11.24	6,906% to 17%	88.67	85,6% to 91,28%	49.955
> 80.19	11.24	6,906% to 17%	88.87	85,82% to 91,46%	50.055
> 80.32	10.65	6,436% to 16,31%	88.87	85,82% to 91,46%	49.76
> 81.35	10.65	6,436% to 16,31%	89.06	86,03% to 91,63%	49.855
> 82.43	10.65	6,436% to 16,31%	89.26	86,25% to 91,8%	49.955
> 83.49	10.06	5,97% to 15,62%	89.26	86,25% to 91,8%	49.66
> 84.62	9.467	5,509% to 14,92%	89.26	86,25% to 91,8%	49.3635
> 85.41	9.467	5,509% to 14,92%	89.45	86,46% to 91,98%	49.4585
> 86.53	8.876	5,053% to 14,22%	89.45	86,46% to 91,98%	49.163
> 87.39	8.284	4,603% to 13,51%	89.45	86,46% to 91,98%	48.867
> 87.91	8.284	4,603% to 13,51%	89.65	86,68% to 92,15%	48.967
> 88.15	8.284	4,603% to 13,51%	89.84	86,9% to 92,32%	49.062
> 88.37	8.284	4,603% to 13,51%	90.04	87,11% to 92,49%	49.162
> 89.42	7.692	4,159% to 12,79%	90.04	87,11% to 92,49%	48.866
> 90.32	7.101	3,723% to 12,07%	90.04	87,11% to 92,49%	48.5705
> 90.54	7.101	3,723% to 12,07%	90.23	87,33% to 92,66%	48.6655
> 90.76	7.101	3,723% to 12,07%	90.43	87,55% to 92,84%	48.7655
> 91.22	7.101	3,723% to 12,07%	90.63	87,76% to 93,01%	48.8655
> 91.89	7.101	3,723% to 12,07%	90.82	87,98% to 93,18%	48.9605
> 92.29	7.101	3,723% to 12,07%	91.02	88,2% to 93,35%	49.0605
> 92.48	7.101	3,723% to 12,07%	91.21	88,42% to 93,52%	49.1555
> 92.7	7.101	3,723% to 12,07%	91.41	88,63% to 93,69%	49.2555
> 93.33	7.101	3,723% to 12,07%	91.6	88,85% to 93,86%	49.3505
> 93.78	7.101	3,723% to 12,07%	91.8	89,07% to 94,02%	49.4505
> 94.29	7.101	3,723% to 12,07%	91.99	89,29% to 94,19%	49.5455
> 95.1	7.101	3,723% to 12,07%	92.19	89,51% to 94,36%	49.6455
> 95.9	7.101	3,723% to 12,07%	92.38	89,73% to 94,53%	49.7405
> 96.42	6.509	3,294% to 11,35%	92.38	89,73% to 94,53%	49.4445
> 96.57	5.917	2,874% to 10,61%	92.38	89,73% to 94,53%	49.1485
> 96.7	5.917	2,874% to 10,61%	92.58	89,95% to 94,69%	49.2485
> 97.09	5.325	2,464% to 9,868%	92.58	89,95% to 94,69%	48.9525
> 97.81	5.325	2,464% to 9,868%	92.77	90,18% to 94,86%	49.0475
> 98.38	4.734	2,066% to 9,114%	92.77	90,18% to 94,86%	48.752
> 99.06	4.734	2,066% to 9,114%	92.97	90,4% to 95,03%	48.852
> 99.96	4.734	2,066% to 9,114%	93.16	90,62% to 95,19%	48.947
> 100.5	4.734	2,066% to 9,114%	93.36	90,84% to 95,36%	49.047
> 100.6	4.734	2,066% to 9,114%	93.55	91,07% to 95,52%	49.142
> 101.1	4.142	1,681% to 8,348%	93.95	91,52% to 95,85%	49.046
> 101.6	4.142	1,681% to 8,348%	94.14	91,74% to 96,01%	49.141
> 102.5	4.142	1,681% to 8,348%	94.34	91,97% to 96,17%	49.241
> 104	4.142	1,681% to 8,348%	94.53	92,19% to 96,34%	49.336
> 105	4.142	1,681% to 8,348%	94.73	92,42% to 96,5%	49.436
> 105.4	4.142	1,681% to 8,348%	94.92	92,65% to 96,66%	49.531
> 106.2	4.142	1,681% to 8,348%	95.12	92,88% to 96,82%	49.631
> 107.2	4.142	1,681% to 8,348%	95.31	93,11% to 96,97%	49.726
> 107.5	4.142	1,681% to 8,348%	95.7	93,57% to 97,29%	49.921
> 107.7	3.55	1,314% to 7,567%	95.7	93,57% to 97,29%	49.625
> 107.9	3.55	1,314% to 7,567%	95.9	93,8% to 97,44%	49.725
> 108.1	2.959	0,9675% to 6,769%	95.9	93,8% to 97,44%	49.4295
> 108.8	2.959	0,9675% to 6,769%	96.09	94,03% to 97,6%	49.5245
> 109.9	2.959	0,9675% to 6,769%	96.29	94,27% to 97,75%	49.6245
> 110.8	2.367	0,6486% to 5,949%	96.29	94,27% to 97,75%	49.3285
> 112.2	2.367	0,6486% to 5,949%	96.48	94,5% to 97,9%	49.4235
> 113.3	2.367	0,6486% to 5,949%	96.68	94,74% to 98,05%	49.5235
> 115.6	2.367	0,6486% to 5,949%	96.88	94,97% to 98,2%	49.6235
> 118.5	2.367	0,6486% to 5,949%	97.07	95,21% to 98,35%	49.7185
> 119.9	2.367	0,6486% to 5,949%	97.27	95,45% to 98,5%	49.8185
> 121.1	2.367	0,6486% to 5,949%	97.46	95,7% to 98,64%	49.9135
> 122.3	2.367	0,6486% to 5,949%	97.66	95,94% to 98,78%	50.0135
> 123	2.367	0,6486% to 5,949%	97.85	96,19% to 98,92%	50.1085
> 124.9	1.775	0,3676% to 5,1%	97.85	96,19% to 98,92%	49.8125
> 127.3	1.775	0,3676% to 5,1%	98.05	96,44% to 99,06%	49.9125
> 128.7	1.183	0,1436% to 4,209%	98.05	96,44% to 99,06%	49.6165
> 129.4	1.183	0,1436% to 4,209%	98.24	96,69% to 99,19%	49.7115
> 131.9	1.183	0,1436% to 4,209%	98.44	96,94% to 99,32%	49.8115
> 134.4	1.183	0,1436% to 4,209%	98.63	97,2% to 99,45%	49.9065
> 134.9	1.183	0,1436% to 4,209%	98.83	97,47% to 99,57%	50.0065
> 137	1.183	0,1436% to 4,209%	99.02	97,74% to 99,68%	50.1015
> 139.8	0.5917	0,01498% to 3,253%	99.02	97,74% to 99,68%	49.8058
> 143	0.5917	0,01498% to 3,253%	99.22	98,01% to 99,79%	49.9059
> 146.3	0.5917	0,01498% to 3,253%	99.41	98,3% to 99,88%	50.0008
> 150	0.5917	0,01498% to 3,253%	99.61	98,6% to 99,95%	50.1009
> 156.1	0	0% to 2,159%	99.61	98,6% to 99,95%	49.805
> 165.9	0	0% to 2,159%	99.8	98,92% to 100%	49.9

## Sheet: DGP (TG2-) IgG
Cut off	Sensitivity%	95% CI	Specificity%	95% CI	Accuracy%
> 0.005	100	97,84% to 100%	0.1953	0,004945% to 1,083%	50.0977
> 0.015	100	97,84% to 100%	0.3906	0,04734% to 1,404%	50.1953
> 0.03	99.41	96,75% to 99,99%	0.7813	0,2133% to 1,988%	50.0956
> 0.045	99.41	96,75% to 99,99%	0.9766	0,3178% to 2,264%	50.1933
> 0.055	98.82	95,79% to 99,86%	1.367	0,5514% to 2,797%	50.0935
> 0.065	98.22	94,9% to 99,63%	1.367	0,5514% to 2,797%	49.7935
> 0.075	97.63	94,05% to 99,35%	1.758	0,8069% to 3,311%	49.694
> 0.085	97.63	94,05% to 99,35%	2.344	1,217% to 4,058%	49.987
> 0.095	97.63	94,05% to 99,35%	2.539	1,359% to 4,303%	50.0845
> 0.105	97.63	94,05% to 99,35%	2.734	1,503% to 4,545%	50.182
> 0.115	97.63	94,05% to 99,35%	2.93	1,649% to 4,786%	50.28
> 0.125	97.63	94,05% to 99,35%	3.125	1,797% to 5,025%	50.3775
> 0.14	97.63	94,05% to 99,35%	3.32	1,946% to 5,263%	50.475
> 0.16	97.04	93,23% to 99,03%	3.516	2,097% to 5,499%	50.278
> 0.18	97.04	93,23% to 99,03%	3.711	2,249% to 5,735%	50.3755
> 0.195	97.04	93,23% to 99,03%	3.906	2,402% to 5,969%	50.473
> 0.205	96.45	92,43% to 98,69%	3.906	2,402% to 5,969%	50.178
> 0.215	95.86	91,65% to 98,32%	4.102	2,557% to 6,202%	49.981
> 0.23	95.86	91,65% to 98,32%	4.297	2,712% to 6,433%	50.0785
> 0.245	94.67	90,13% to 97,54%	4.297	2,712% to 6,433%	49.4835
> 0.255	93.49	88,65% to 96,71%	4.492	2,869% to 6,664%	48.991
> 0.265	93.49	88,65% to 96,71%	4.883	3,184% to 7,124%	49.1865
> 0.28	93.49	88,65% to 96,71%	5.273	3,504% to 7,58%	49.3815
> 0.3	93.49	88,65% to 96,71%	5.664	3,826% to 8,034%	49.577
> 0.315	92.9	87,93% to 96,28%	5.859	3,988% to 8,259%	49.3795
> 0.325	92.31	87,21% to 95,84%	5.859	3,988% to 8,259%	49.0845
> 0.35	92.31	87,21% to 95,84%	6.055	4,151% to 8,484%	49.1825
> 0.39	92.31	87,21% to 95,84%	6.25	4,314% to 8,709%	49.28
> 0.42	92.31	87,21% to 95,84%	6.445	4,478% to 8,933%	49.3775
> 0.435	92.31	87,21% to 95,84%	6.641	4,642% to 9,156%	49.4755
> 0.445	92.31	87,21% to 95,84%	6.836	4,807% to 9,379%	49.573
> 0.455	92.31	87,21% to 95,84%	7.227	5,139% to 9,824%	49.7685
> 0.485	91.72	86,49% to 95,4%	7.422	5,305% to 10,05%	49.571
> 0.515	91.72	86,49% to 95,4%	7.617	5,472% to 10,27%	49.6685
> 0.535	91.72	86,49% to 95,4%	7.813	5,64% to 10,49%	49.7665
> 0.555	91.12	85,78% to 94,95%	7.813	5,64% to 10,49%	49.4665
> 0.58	90.53	85,08% to 94,49%	8.203	5,976% to 10,93%	49.3665
> 0.605	90.53	85,08% to 94,49%	8.398	6,145% to 11,15%	49.464
> 0.615	90.53	85,08% to 94,49%	8.594	6,314% to 11,37%	49.562
> 0.635	89.35	83,69% to 93,56%	8.594	6,314% to 11,37%	48.972
> 0.66	89.35	83,69% to 93,56%	8.789	6,483% to 11,58%	49.0695
> 0.675	89.35	83,69% to 93,56%	9.18	6,823% to 12,02%	49.265
> 0.685	88.76	83% to 93,09%	9.18	6,823% to 12,02%	48.97
> 0.695	88.76	83% to 93,09%	9.375	6,993% to 12,24%	49.0675
> 0.71	88.76	83% to 93,09%	9.57	7,164% to 12,45%	49.165
> 0.725	88.76	83% to 93,09%	9.766	7,335% to 12,67%	49.263
> 0.735	88.17	82,32% to 92,62%	9.766	7,335% to 12,67%	48.968
> 0.745	87.57	81,63% to 92,14%	9.766	7,335% to 12,67%	48.668
> 0.755	87.57	81,63% to 92,14%	9.961	7,507% to 12,89%	48.7655
> 0.765	86.98	80,96% to 91,66%	9.961	7,507% to 12,89%	48.4705
> 0.775	86.98	80,96% to 91,66%	10.16	7,679% to 13,1%	48.57
> 0.795	86.98	80,96% to 91,66%	10.35	7,851% to 13,32%	48.665
> 0.82	86.98	80,96% to 91,66%	10.55	8,023% to 13,54%	48.765
> 0.835	86.98	80,96% to 91,66%	10.74	8,196% to 13,75%	48.86
> 0.855	86.98	80,96% to 91,66%	10.94	8,368% to 13,97%	48.96
> 0.875	86.98	80,96% to 91,66%	11.13	8,542% to 14,18%	49.055
> 0.885	86.98	80,96% to 91,66%	11.52	8,889% to 14,61%	49.25
> 0.9	86.98	80,96% to 91,66%	11.72	9,063% to 14,83%	49.35
> 0.915	86.39	80,28% to 91,17%	11.91	9,237% to 15,04%	49.15
> 0.945	86.39	80,28% to 91,17%	12.11	9,411% to 15,25%	49.25
> 0.975	85.8	79,61% to 90,68%	12.5	9,761% to 15,68%	49.15
> 0.985	85.8	79,61% to 90,68%	12.7	9,936% to 15,89%	49.25
> 1.005	85.8	79,61% to 90,68%	12.89	10,11% to 16,11%	49.345
> 1.025	85.8	79,61% to 90,68%	13.09	10,29% to 16,32%	49.445
> 1.035	85.8	79,61% to 90,68%	13.67	10,82% to 16,96%	49.735
> 1.045	85.8	79,61% to 90,68%	13.87	10,99% to 17,17%	49.835
> 1.055	85.8	79,61% to 90,68%	14.06	11,17% to 17,38%	49.93
> 1.08	85.21	78,94% to 90,19%	14.06	11,17% to 17,38%	49.635
> 1.105	85.21	78,94% to 90,19%	14.26	11,35% to 17,59%	49.735
> 1.115	85.21	78,94% to 90,19%	14.45	11,52% to 17,8%	49.83
> 1.135	85.21	78,94% to 90,19%	14.65	11,7% to 18,01%	49.93
> 1.17	85.21	78,94% to 90,19%	14.84	11,88% to 18,22%	50.025
> 1.21	84.62	78,28% to 89,7%	14.84	11,88% to 18,22%	49.73
> 1.25	84.02	77,61% to 89,2%	14.84	11,88% to 18,22%	49.43
> 1.275	84.02	77,61% to 89,2%	15.04	12,05% to 18,43%	49.53
> 1.295	83.43	76,95% to 88,7%	15.04	12,05% to 18,43%	49.235
> 1.33	83.43	76,95% to 88,7%	15.23	12,23% to 18,64%	49.33
> 1.355	82.84	76,29% to 88,2%	15.23	12,23% to 18,64%	49.035
> 1.38	82.84	76,29% to 88,2%	15.43	12,41% to 18,85%	49.135
> 1.405	82.84	76,29% to 88,2%	15.63	12,59% to 19,06%	49.235
> 1.415	82.84	76,29% to 88,2%	15.82	12,77% to 19,27%	49.33
> 1.43	82.84	76,29% to 88,2%	16.02	12,95% to 19,48%	49.43
> 1.445	82.84	76,29% to 88,2%	16.21	13,12% to 19,69%	49.525
> 1.47	82.84	76,29% to 88,2%	16.41	13,3% to 19,9%	49.625
> 1.505	82.84	76,29% to 88,2%	16.6	13,48% to 20,11%	49.72
> 1.525	82.25	75,64% to 87,69%	16.99	13,84% to 20,53%	49.62
> 1.555	81.66	74,99% to 87,18%	16.99	13,84% to 20,53%	49.325
> 1.585	81.66	74,99% to 87,18%	17.38	14,2% to 20,95%	49.52
> 1.595	81.66	74,99% to 87,18%	17.77	14,56% to 21,37%	49.715
> 1.635	81.07	74,33% to 86,67%	17.97	14,74% to 21,57%	49.52
> 1.675	81.07	74,33% to 86,67%	18.16	14,92% to 21,78%	49.615
> 1.715	81.07	74,33% to 86,67%	18.36	15,1% to 21,99%	49.715
> 1.765	81.07	74,33% to 86,67%	18.55	15,28% to 22,2%	49.81
> 1.82	81.07	74,33% to 86,67%	18.95	15,64% to 22,61%	50.01
> 1.88	81.07	74,33% to 86,67%	19.14	15,82% to 22,82%	50.105
> 1.91	81.07	74,33% to 86,67%	19.34	16% to 23,03%	50.205
> 1.925	80.47	73,69% to 86,16%	19.34	16% to 23,03%	49.905
> 1.945	80.47	73,69% to 86,16%	19.53	16,18% to 23,23%	50
> 1.97	80.47	73,69% to 86,16%	19.73	16,37% to 23,44%	50.1
> 1.995	79.88	73,04% to 85,65%	19.73	16,37% to 23,44%	49.805
> 2.03	79.88	73,04% to 85,65%	19.92	16,55% to 23,65%	49.9
> 2.065	79.88	73,04% to 85,65%	20.31	16,91% to 24,06%	50.095
> 2.085	79.88	73,04% to 85,65%	20.51	17,09% to 24,27%	50.195
> 2.095	79.29	72,39% to 85,13%	20.9	17,46% to 24,68%	50.095
> 2.115	79.29	72,39% to 85,13%	21.09	17,64% to 24,89%	50.19
> 2.135	78.7	71,75% to 84,61%	21.09	17,64% to 24,89%	49.895
> 2.18	78.7	71,75% to 84,61%	21.29	17,82% to 25,09%	49.995
> 2.23	78.7	71,75% to 84,61%	21.68	18,18% to 25,51%	50.19
> 2.245	78.11	71,11% to 84,09%	21.68	18,18% to 25,51%	49.895
> 2.26	78.11	71,11% to 84,09%	21.88	18,37% to 25,71%	49.995
> 2.285	78.11	71,11% to 84,09%	22.07	18,55% to 25,92%	50.09
> 2.305	78.11	71,11% to 84,09%	22.27	18,73% to 26,12%	50.19
> 2.35	76.33	69,19% to 82,52%	22.46	18,92% to 26,33%	49.395
> 2.415	75.74	68,56% to 81,99%	22.46	18,92% to 26,33%	49.1
> 2.45	75.74	68,56% to 81,99%	22.66	19,1% to 26,53%	49.2
> 2.47	75.74	68,56% to 81,99%	22.85	19,28% to 26,74%	49.295
> 2.485	75.74	68,56% to 81,99%	23.05	19,47% to 26,94%	49.395
> 2.505	75.15	67,93% to 81,46%	23.05	19,47% to 26,94%	49.1
> 2.54	75.15	67,93% to 81,46%	23.24	19,65% to 27,15%	49.195
> 2.565	75.15	67,93% to 81,46%	23.44	19,83% to 27,35%	49.295
> 2.585	75.15	67,93% to 81,46%	23.63	20,02% to 27,56%	49.39
> 2.615	75.15	67,93% to 81,46%	24.02	20,38% to 27,97%	49.585
> 2.64	75.15	67,93% to 81,46%	24.41	20,75% to 28,37%	49.78
> 2.67	75.15	67,93% to 81,46%	24.61	20,94% to 28,58%	49.88
> 2.695	75.15	67,93% to 81,46%	25	21,31% to 28,99%	50.075
> 2.71	74.56	67,3% to 80,93%	25	21,31% to 28,99%	49.78
> 2.725	74.56	67,3% to 80,93%	25.2	21,49% to 29,19%	49.88
> 2.74	74.56	67,3% to 80,93%	25.39	21,67% to 29,39%	49.975
> 2.76	73.96	66,67% to 80,4%	25.59	21,86% to 29,6%	49.775
> 2.85	73.96	66,67% to 80,4%	25.78	22,04% to 29,8%	49.87
> 2.99	73.96	66,67% to 80,4%	25.98	22,23% to 30%	49.97
> 3.055	73.96	66,67% to 80,4%	26.17	22,41% to 30,21%	50.065
> 3.065	73.37	66,04% to 79,87%	26.17	22,41% to 30,21%	49.77
> 3.075	73.37	66,04% to 79,87%	26.37	22,6% to 30,41%	49.87
> 3.11	72.78	65,41% to 79,33%	26.37	22,6% to 30,41%	49.575
> 3.15	72.78	65,41% to 79,33%	26.76	22,97% to 30,82%	49.77
> 3.165	72.78	65,41% to 79,33%	26.95	23,15% to 31,02%	49.865
> 3.175	72.78	65,41% to 79,33%	27.15	23,34% to 31,22%	49.965
> 3.22	72.78	65,41% to 79,33%	27.34	23,53% to 31,43%	50.06
> 3.285	71.6	64,16% to 78,26%	27.34	23,53% to 31,43%	49.47
> 3.335	71.6	64,16% to 78,26%	27.54	23,71% to 31,63%	49.57
> 3.365	71.6	64,16% to 78,26%	27.93	24,08% to 32,03%	49.765
> 3.375	71.6	64,16% to 78,26%	28.13	24,27% to 32,24%	49.865
> 3.39	71.6	64,16% to 78,26%	28.32	24,45% to 32,44%	49.96
> 3.405	71.6	64,16% to 78,26%	28.52	24,64% to 32,64%	50.06
> 3.44	71.6	64,16% to 78,26%	28.71	24,83% to 32,84%	50.155
> 3.48	71.6	64,16% to 78,26%	28.91	25,01% to 33,04%	50.255
> 3.505	71.6	64,16% to 78,26%	29.1	25,2% to 33,25%	50.35
> 3.55	71.01	63,54% to 77,72%	29.3	25,39% to 33,45%	50.155
> 3.585	71.01	63,54% to 77,72%	29.49	25,57% to 33,65%	50.25
> 3.655	70.41	62,92% to 77,18%	29.49	25,57% to 33,65%	49.95
> 3.73	70.41	62,92% to 77,18%	29.69	25,76% to 33,85%	50.05
> 3.75	70.41	62,92% to 77,18%	29.88	25,95% to 34,05%	50.145
> 3.84	70.41	62,92% to 77,18%	30.08	26,13% to 34,26%	50.245
> 3.94	70.41	62,92% to 77,18%	30.47	26,51% to 34,66%	50.44
> 3.995	70.41	62,92% to 77,18%	30.66	26,69% to 34,86%	50.535
> 4.04	69.82	62,3% to 76,63%	30.86	26,88% to 35,06%	50.34
> 4.06	69.82	62,3% to 76,63%	31.05	27,07% to 35,26%	50.435
> 4.085	69.82	62,3% to 76,63%	31.25	27,26% to 35,46%	50.535
> 4.11	69.82	62,3% to 76,63%	31.45	27,44% to 35,66%	50.635
> 4.125	69.82	62,3% to 76,63%	31.64	27,63% to 35,86%	50.73
> 4.16	69.82	62,3% to 76,63%	31.84	27,82% to 36,06%	50.83
> 4.195	69.82	62,3% to 76,63%	32.03	28,01% to 36,27%	50.925
> 4.24	69.23	61,68% to 76,09%	32.03	28,01% to 36,27%	50.63
> 4.315	68.64	61,07% to 75,55%	32.03	28,01% to 36,27%	50.335
> 4.36	68.64	61,07% to 75,55%	32.23	28,19% to 36,47%	50.435
> 4.43	68.64	61,07% to 75,55%	32.42	28,38% to 36,67%	50.53
> 4.57	68.05	60,45% to 75%	32.81	28,76% to 37,07%	50.43
> 4.66	68.05	60,45% to 75%	33.01	28,95% to 37,27%	50.53
> 4.78	68.05	60,45% to 75%	33.4	29,32% to 37,67%	50.725
> 4.98	68.05	60,45% to 75%	33.79	29,7% to 38,07%	50.92
> 5.11	68.05	60,45% to 75%	33.98	29,89% to 38,27%	51.015
> 5.155	68.05	60,45% to 75%	34.18	30,08% to 38,47%	51.115
> 5.17	68.05	60,45% to 75%	34.38	30,26% to 38,67%	51.215
> 5.185	67.46	59,83% to 74,45%	34.38	30,26% to 38,67%	50.92
> 5.2	67.46	59,83% to 74,45%	34.77	30,64% to 39,07%	51.115
> 5.22	66.86	59,22% to 73,9%	34.77	30,64% to 39,07%	50.815
> 5.26	66.86	59,22% to 73,9%	34.96	30,83% to 39,27%	50.91
> 5.34	66.27	58,61% to 73,35%	34.96	30,83% to 39,27%	50.615
> 5.425	65.68	58% to 72,8%	34.96	30,83% to 39,27%	50.32
> 5.465	65.68	58% to 72,8%	35.16	31,02% to 39,47%	50.42
> 5.49	65.09	57,39% to 72,25%	35.16	31,02% to 39,47%	50.125
> 5.525	65.09	57,39% to 72,25%	35.35	31,21% to 39,67%	50.22
> 5.555	65.09	57,39% to 72,25%	35.74	31,59% to 40,06%	50.415
> 5.59	64.5	56,78% to 71,69%	35.94	31,78% to 40,26%	50.22
> 5.62	64.5	56,78% to 71,69%	36.13	31,96% to 40,46%	50.315
> 5.635	64.5	56,78% to 71,69%	36.33	32,15% to 40,66%	50.415
> 5.67	64.5	56,78% to 71,69%	36.52	32,34% to 40,86%	50.51
> 5.715	63.91	56,17% to 71,14%	36.52	32,34% to 40,86%	50.215
> 5.735	63.91	56,17% to 71,14%	36.72	32,53% to 41,06%	50.315
> 5.8	63.31	55,57% to 70,58%	36.72	32,53% to 41,06%	50.015
> 5.87	63.31	55,57% to 70,58%	36.91	32,72% to 41,26%	50.11
> 5.905	63.31	55,57% to 70,58%	37.11	32,91% to 41,46%	50.21
> 5.94	63.31	55,57% to 70,58%	37.3	33,1% to 41,66%	50.305
> 5.975	63.31	55,57% to 70,58%	37.5	33,29% to 41,85%	50.405
> 6.005	63.31	55,57% to 70,58%	37.7	33,48% to 42,05%	50.505
> 6.025	63.31	55,57% to 70,58%	37.89	33,67% to 42,25%	50.6
> 6.05	62.72	54,96% to 70,03%	37.89	33,67% to 42,25%	50.305
> 6.08	62.72	54,96% to 70,03%	38.09	33,86% to 42,45%	50.405
> 6.105	62.72	54,96% to 70,03%	38.28	34,05% to 42,65%	50.5
> 6.115	62.72	54,96% to 70,03%	38.48	34,24% to 42,85%	50.6
> 6.13	62.72	54,96% to 70,03%	38.67	34,43% to 43,04%	50.695
> 6.21	62.72	54,96% to 70,03%	39.06	34,81% to 43,44%	50.89
> 6.35	62.72	54,96% to 70,03%	39.26	35% to 43,64%	50.99
> 6.445	62.72	54,96% to 70,03%	39.45	35,19% to 43,84%	51.085
> 6.49	62.72	54,96% to 70,03%	39.65	35,38% to 44,03%	51.185
> 6.57	62.72	54,96% to 70,03%	39.84	35,57% to 44,23%	51.28
> 6.64	62.72	54,96% to 70,03%	40.04	35,77% to 44,43%	51.38
> 6.655	62.72	54,96% to 70,03%	40.43	36,15% to 44,82%	51.575
> 6.665	62.72	54,96% to 70,03%	40.63	36,34% to 45,02%	51.675
> 6.69	62.72	54,96% to 70,03%	40.82	36,53% to 45,22%	51.77
> 6.72	62.72	54,96% to 70,03%	41.02	36,72% to 45,42%	51.87
> 6.77	62.72	54,96% to 70,03%	41.21	36,91% to 45,61%	51.965
> 6.825	62.72	54,96% to 70,03%	41.8	37,49% to 46,2%	52.26
> 6.865	62.13	54,36% to 69,47%	41.8	37,49% to 46,2%	51.965
> 6.905	62.13	54,36% to 69,47%	41.99	37,68% to 46,4%	52.06
> 6.93	62.13	54,36% to 69,47%	42.19	37,87% to 46,6%	52.16
> 6.95	62.13	54,36% to 69,47%	42.38	38,06% to 46,79%	52.255
> 6.97	62.13	54,36% to 69,47%	42.58	38,25% to 46,99%	52.355
> 7.025	62.13	54,36% to 69,47%	42.77	38,44% to 47,19%	52.45
> 7.075	62.13	54,36% to 69,47%	42.97	38,63% to 47,38%	52.55
> 7.09	62.13	54,36% to 69,47%	43.16	38,83% to 47,58%	52.645
> 7.115	62.13	54,36% to 69,47%	43.36	39,02% to 47,78%	52.745
> 7.135	62.13	54,36% to 69,47%	43.55	39,21% to 47,97%	52.84
> 7.145	62.13	54,36% to 69,47%	43.75	39,4% to 48,17%	52.94
> 7.17	62.13	54,36% to 69,47%	43.95	39,59% to 48,37%	53.04
> 7.2	62.13	54,36% to 69,47%	44.14	39,79% to 48,56%	53.135
> 7.215	62.13	54,36% to 69,47%	44.34	39,98% to 48,76%	53.235
> 7.25	62.13	54,36% to 69,47%	44.53	40,17% to 48,95%	53.33
> 7.29	62.13	54,36% to 69,47%	44.73	40,36% to 49,15%	53.43
> 7.32	62.13	54,36% to 69,47%	44.92	40,56% to 49,35%	53.525
> 7.35	62.13	54,36% to 69,47%	45.31	40,94% to 49,74%	53.72
> 7.375	62.13	54,36% to 69,47%	45.51	41,13% to 49,93%	53.82
> 7.425	61.54	53,76% to 68,91%	45.51	41,13% to 49,93%	53.525
> 7.475	60.95	53,16% to 68,35%	45.51	41,13% to 49,93%	53.23
> 7.5	60.36	52,56% to 67,78%	45.51	41,13% to 49,93%	52.935
> 7.515	59.76	51,96% to 67,22%	45.51	41,13% to 49,93%	52.635
> 7.525	59.76	51,96% to 67,22%	45.7	41,33% to 50,13%	52.73
> 7.54	59.76	51,96% to 67,22%	45.9	41,52% to 50,33%	52.83
> 7.565	59.76	51,96% to 67,22%	46.09	41,71% to 50,52%	52.925
> 7.605	59.76	51,96% to 67,22%	46.29	41,9% to 50,72%	53.025
> 7.635	59.76	51,96% to 67,22%	46.48	42,1% to 50,91%	53.12
> 7.73	59.76	51,96% to 67,22%	46.68	42,29% to 51,11%	53.22
> 7.83	59.76	51,96% to 67,22%	47.27	42,87% to 51,69%	53.515
> 7.86	59.76	51,96% to 67,22%	47.46	43,06% to 51,89%	53.61
> 7.925	59.76	51,96% to 67,22%	47.66	43,26% to 52,08%	53.71
> 8.035	59.17	51,36% to 66,66%	47.66	43,26% to 52,08%	53.415
> 8.12	59.17	51,36% to 66,66%	47.85	43,45% to 52,28%	53.51
> 8.145	59.17	51,36% to 66,66%	48.05	43,64% to 52,47%	53.61
> 8.17	58.58	50,76% to 66,09%	48.05	43,64% to 52,47%	53.315
> 8.205	58.58	50,76% to 66,09%	48.24	43,84% to 52,67%	53.41
> 8.24	58.58	50,76% to 66,09%	48.44	44,03% to 52,86%	53.51
> 8.275	57.99	50,17% to 65,53%	48.44	44,03% to 52,86%	53.215
> 8.32	57.99	50,17% to 65,53%	48.83	44,42% to 53,25%	53.41
> 8.355	57.4	49,57% to 64,96%	49.02	44,61% to 53,45%	53.21
> 8.4	57.4	49,57% to 64,96%	49.22	44,81% to 53,64%	53.31
> 8.49	57.4	49,57% to 64,96%	49.41	45% to 53,83%	53.405
> 8.555	57.4	49,57% to 64,96%	49.61	45,19% to 54,03%	53.505
> 8.575	57.4	49,57% to 64,96%	49.8	45,39% to 54,22%	53.6
> 8.64	56.8	48,98% to 64,39%	49.8	45,39% to 54,22%	53.3
> 8.71	56.8	48,98% to 64,39%	50	45,58% to 54,42%	53.4
> 8.755	56.8	48,98% to 64,39%	50.2	45,78% to 54,61%	53.5
> 8.805	56.21	48,38% to 63,82%	50.2	45,78% to 54,61%	53.205
> 8.825	56.21	48,38% to 63,82%	50.39	45,97% to 54,81%	53.3
> 8.91	55.62	47,79% to 63,25%	50.59	46,17% to 55%	53.105
> 9.01	55.62	47,79% to 63,25%	50.78	46,36% to 55,19%	53.2
> 9.04	55.62	47,79% to 63,25%	50.98	46,55% to 55,39%	53.3
> 9.06	55.62	47,79% to 63,25%	51.17	46,75% to 55,58%	53.395
> 9.1	55.62	47,79% to 63,25%	51.37	46,94% to 55,78%	53.495
> 9.155	55.62	47,79% to 63,25%	51.56	47,14% to 55,97%	53.59
> 9.205	55.62	47,79% to 63,25%	51.76	47,33% to 56,16%	53.69
> 9.24	55.03	47,2% to 62,68%	51.95	47,53% to 56,36%	53.49
> 9.3	55.03	47,2% to 62,68%	52.15	47,72% to 56,55%	53.59
> 9.355	55.03	47,2% to 62,68%	52.54	48,11% to 56,94%	53.785
> 9.39	55.03	47,2% to 62,68%	52.73	48,31% to 57,13%	53.88
> 9.43	55.03	47,2% to 62,68%	52.93	48,5% to 57,32%	53.98
> 9.47	55.03	47,2% to 62,68%	53.13	48,7% to 57,52%	54.08
> 9.505	55.03	47,2% to 62,68%	53.32	48,89% to 57,71%	54.175
> 9.545	55.03	47,2% to 62,68%	53.71	49,28% to 58,1%	54.37
> 9.59	55.03	47,2% to 62,68%	53.91	49,48% to 58,29%	54.47
> 9.61	55.03	47,2% to 62,68%	54.1	49,67% to 58,48%	54.565
> 9.645	55.03	47,2% to 62,68%	54.3	49,87% to 58,67%	54.665
> 9.725	55.03	47,2% to 62,68%	54.49	50,07% to 58,87%	54.76
> 9.785	55.03	47,2% to 62,68%	54.69	50,26% to 59,06%	54.86
> 9.825	54.44	46,61% to 62,1%	54.69	50,26% to 59,06%	54.565
> 9.875	54.44	46,61% to 62,1%	54.88	50,46% to 59,25%	54.66
> 9.925	54.44	46,61% to 62,1%	55.08	50,65% to 59,44%	54.76
> 9.965	54.44	46,61% to 62,1%	55.27	50,85% to 59,64%	54.855
> 9.985	54.44	46,61% to 62,1%	55.47	51,05% to 59,83%	54.955
> 10.01	54.44	46,61% to 62,1%	55.86	51,44% to 60,21%	55.15
> 10.02	54.44	46,61% to 62,1%	56.05	51,63% to 60,41%	55.245
> 10.07	53.85	46,02% to 61,53%	56.05	51,63% to 60,41%	54.95
> 10.18	53.85	46,02% to 61,53%	56.25	51,83% to 60,6%	55.05
> 10.28	53.25	45,44% to 60,96%	56.25	51,83% to 60,6%	54.75
> 10.32	52.66	44,85% to 60,38%	56.25	51,83% to 60,6%	54.455
> 10.35	52.66	44,85% to 60,38%	56.45	52,03% to 60,79%	54.555
> 10.4	52.66	44,85% to 60,38%	56.64	52,22% to 60,98%	54.65
> 10.44	52.66	44,85% to 60,38%	56.84	52,42% to 61,17%	54.75
> 10.47	52.66	44,85% to 60,38%	57.03	52,62% to 61,37%	54.845
> 10.5	52.66	44,85% to 60,38%	57.23	52,81% to 61,56%	54.945
> 10.61	52.07	44,27% to 59,8%	57.23	52,81% to 61,56%	54.65
> 10.77	52.07	44,27% to 59,8%	57.42	53,01% to 61,75%	54.745
> 10.83	52.07	44,27% to 59,8%	57.62	53,21% to 61,94%	54.845
> 10.89	52.07	44,27% to 59,8%	57.81	53,4% to 62,13%	54.94
> 10.95	52.07	44,27% to 59,8%	58.01	53,6% to 62,32%	55.04
> 10.97	51.48	43,68% to 59,23%	58.01	53,6% to 62,32%	54.745
> 10.99	51.48	43,68% to 59,23%	58.2	53,8% to 62,51%	54.84
> 11.07	50.89	43,1% to 58,65%	58.2	53,8% to 62,51%	54.545
> 11.15	50.89	43,1% to 58,65%	58.4	53,99% to 62,71%	54.645
> 11.19	50.89	43,1% to 58,65%	58.59	54,19% to 62,9%	54.74
> 11.23	50.3	42,52% to 58,07%	58.59	54,19% to 62,9%	54.445
> 11.25	49.7	41,93% to 57,48%	58.59	54,19% to 62,9%	54.145
> 11.27	49.11	41,35% to 56,9%	58.59	54,19% to 62,9%	53.85
> 11.37	49.11	41,35% to 56,9%	58.79	54,39% to 63,09%	53.95
> 11.6	49.11	41,35% to 56,9%	58.98	54,58% to 63,28%	54.045
> 11.89	49.11	41,35% to 56,9%	59.18	54,78% to 63,47%	54.145
> 12.05	49.11	41,35% to 56,9%	59.38	54,98% to 63,66%	54.245
> 12.09	49.11	41,35% to 56,9%	59.57	55,18% to 63,85%	54.34
> 12.14	49.11	41,35% to 56,9%	59.77	55,37% to 64,04%	54.44
> 12.17	48.52	40,77% to 56,32%	59.77	55,37% to 64,04%	54.145
> 12.27	48.52	40,77% to 56,32%	59.96	55,57% to 64,23%	54.24
> 12.36	48.52	40,77% to 56,32%	60.16	55,77% to 64,43%	54.34
> 12.46	47.93	40,2% to 55,73%	60.35	55,97% to 64,62%	54.14
> 12.55	47.34	39,62% to 55,15%	60.55	56,16% to 64,81%	53.945
> 12.58	47.34	39,62% to 55,15%	60.94	56,56% to 65,19%	54.14
> 12.63	46.75	39,04% to 54,56%	60.94	56,56% to 65,19%	53.845
> 12.71	46.75	39,04% to 54,56%	61.13	56,76% to 65,38%	53.94
> 12.86	46.75	39,04% to 54,56%	61.52	57,15% to 65,76%	54.135
> 12.99	46.15	38,47% to 53,98%	61.72	57,35% to 65,95%	53.935
> 13.04	46.15	38,47% to 53,98%	61.91	57,55% to 66,14%	54.03
> 13.07	46.15	38,47% to 53,98%	62.11	57,75% to 66,33%	54.13
> 13.1	46.15	38,47% to 53,98%	62.3	57,95% to 66,52%	54.225
> 13.13	46.15	38,47% to 53,98%	62.5	58,15% to 66,71%	54.325
> 13.16	45.56	37,9% to 53,39%	62.5	58,15% to 66,71%	54.03
> 13.26	44.97	37,32% to 52,8%	62.7	58,34% to 66,9%	53.835
> 13.37	44.97	37,32% to 52,8%	62.89	58,54% to 67,09%	53.93
> 13.44	44.97	37,32% to 52,8%	63.09	58,74% to 67,28%	54.03
> 13.5	44.38	36,75% to 52,21%	63.09	58,74% to 67,28%	53.735
> 13.55	44.38	36,75% to 52,21%	63.28	58,94% to 67,47%	53.83
> 13.62	44.38	36,75% to 52,21%	63.48	59,14% to 67,66%	53.93
> 13.68	44.38	36,75% to 52,21%	63.67	59,34% to 67,85%	54.025
> 13.74	44.38	36,75% to 52,21%	63.87	59,54% to 68,04%	54.125
> 13.77	44.38	36,75% to 52,21%	64.06	59,74% to 68,22%	54.22
> 13.8	44.38	36,75% to 52,21%	64.26	59,94% to 68,41%	54.32
> 13.84	43.79	36,18% to 51,62%	64.26	59,94% to 68,41%	54.025
> 13.96	43.79	36,18% to 51,62%	64.45	60,14% to 68,6%	54.12
> 14.06	43.79	36,18% to 51,62%	64.65	60,33% to 68,79%	54.22
> 14.07	43.79	36,18% to 51,62%	64.84	60,53% to 68,98%	54.315
> 14.09	43.2	35,61% to 51,02%	64.84	60,53% to 68,98%	54.02
> 14.14	43.2	35,61% to 51,02%	65.04	60,73% to 69,17%	54.12
> 14.2	43.2	35,61% to 51,02%	65.23	60,93% to 69,36%	54.215
> 14.22	42.6	35,04% to 50,43%	65.23	60,93% to 69,36%	53.915
> 14.29	42.01	34,47% to 49,83%	65.23	60,93% to 69,36%	53.62
> 14.41	42.01	34,47% to 49,83%	65.43	61,13% to 69,55%	53.72
> 14.51	42.01	34,47% to 49,83%	65.63	61,33% to 69,74%	53.82
> 14.58	41.42	33,91% to 49,24%	65.63	61,33% to 69,74%	53.525
> 14.69	41.42	33,91% to 49,24%	65.82	61,53% to 69,92%	53.62
> 14.78	41.42	33,91% to 49,24%	66.21	61,93% to 70,3%	53.815
> 14.88	41.42	33,91% to 49,24%	66.41	62,13% to 70,49%	53.915
> 15.16	41.42	33,91% to 49,24%	66.6	62,33% to 70,68%	54.01
> 15.41	41.42	33,91% to 49,24%	66.8	62,53% to 70,87%	54.11
> 15.55	41.42	33,91% to 49,24%	67.19	62,93% to 71,24%	54.305
> 15.7	41.42	33,91% to 49,24%	67.38	63,13% to 71,43%	54.4
> 15.82	41.42	33,91% to 49,24%	67.58	63,33% to 71,62%	54.5
> 15.91	40.83	33,34% to 48,64%	67.58	63,33% to 71,62%	54.205
> 15.95	40.24	32,78% to 48,04%	67.58	63,33% to 71,62%	53.91
> 15.98	40.24	32,78% to 48,04%	67.77	63,53% to 71,81%	54.005
> 16.1	39.64	32,22% to 47,44%	67.77	63,53% to 71,81%	53.705
> 16.2	39.05	31,65% to 46,84%	67.77	63,53% to 71,81%	53.41
> 16.21	39.05	31,65% to 46,84%	68.16	63,94% to 72,18%	53.605
> 16.25	39.05	31,65% to 46,84%	68.36	64,14% to 72,37%	53.705
> 16.28	39.05	31,65% to 46,84%	68.55	64,34% to 72,56%	53.8
> 16.3	39.05	31,65% to 46,84%	68.75	64,54% to 72,74%	53.9
> 16.33	39.05	31,65% to 46,84%	68.95	64,74% to 72,93%	54
> 16.39	38.46	31,09% to 46,24%	69.14	64,94% to 73,12%	53.8
> 16.45	37.87	30,53% to 45,64%	69.14	64,94% to 73,12%	53.505
> 16.5	37.87	30,53% to 45,64%	69.34	65,14% to 73,31%	53.605
> 16.55	37.87	30,53% to 45,64%	69.53	65,34% to 73,49%	53.7
> 16.59	37.87	30,53% to 45,64%	69.73	65,54% to 73,68%	53.8
> 16.65	37.87	30,53% to 45,64%	70.12	65,95% to 74,05%	53.995
> 16.7	37.28	29,97% to 45,04%	70.12	65,95% to 74,05%	53.7
> 16.72	36.09	28,86% to 43,83%	70.31	66,15% to 74,24%	53.2
> 16.77	35.5	28,31% to 43,22%	70.31	66,15% to 74,24%	52.905
> 16.95	35.5	28,31% to 43,22%	70.51	66,35% to 74,43%	53.005
> 17.16	35.5	28,31% to 43,22%	70.7	66,55% to 74,61%	53.1
> 17.25	34.91	27,75% to 42,61%	70.7	66,55% to 74,61%	52.805
> 17.29	34.91	27,75% to 42,61%	70.9	66,75% to 74,8%	52.905
> 17.34	34.32	27,2% to 42%	70.9	66,75% to 74,8%	52.61
> 17.4	34.32	27,2% to 42%	71.09	66,96% to 74,99%	52.705
> 17.5	33.73	26,65% to 41,39%	71.09	66,96% to 74,99%	52.41
> 17.57	33.73	26,65% to 41,39%	71.29	67,16% to 75,17%	52.51
> 17.68	33.73	26,65% to 41,39%	71.48	67,36% to 75,36%	52.605
> 17.84	33.14	26,1% to 40,78%	71.48	67,36% to 75,36%	52.31
> 17.97	33.14	26,1% to 40,78%	71.68	67,56% to 75,55%	52.41
> 18.07	32.54	25,55% to 40,17%	71.68	67,56% to 75,55%	52.11
> 18.14	32.54	25,55% to 40,17%	71.88	67,76% to 75,73%	52.21
> 18.2	32.54	25,55% to 40,17%	72.07	67,97% to 75,92%	52.305
> 18.25	31.95	25% to 39,55%	72.46	68,37% to 76,29%	52.205
> 18.27	31.36	24,45% to 38,93%	72.46	68,37% to 76,29%	51.91
> 18.34	31.36	24,45% to 38,93%	72.66	68,57% to 76,47%	52.01
> 18.42	31.36	24,45% to 38,93%	72.85	68,78% to 76,66%	52.105
> 18.47	31.36	24,45% to 38,93%	73.05	68,98% to 76,85%	52.205
> 18.53	31.36	24,45% to 38,93%	73.24	69,18% to 77,03%	52.3
> 18.7	31.36	24,45% to 38,93%	73.44	69,39% to 77,22%	52.4
> 18.85	31.36	24,45% to 38,93%	73.63	69,59% to 77,4%	52.495
> 18.88	31.36	24,45% to 38,93%	73.83	69,79% to 77,59%	52.595
> 18.91	31.36	24,45% to 38,93%	74.02	70% to 77,77%	52.69
> 18.98	31.36	24,45% to 38,93%	74.22	70,2% to 77,96%	52.79
> 19.07	31.36	24,45% to 38,93%	74.41	70,4% to 78,14%	52.885
> 19.18	31.36	24,45% to 38,93%	74.61	70,61% to 78,33%	52.985
> 19.36	31.36	24,45% to 38,93%	74.8	70,81% to 78,51%	53.08
> 19.5	31.36	24,45% to 38,93%	75	71,01% to 78,69%	53.18
> 19.71	31.36	24,45% to 38,93%	75.2	71,22% to 78,88%	53.28
> 19.92	31.36	24,45% to 38,93%	75.39	71,42% to 79,06%	53.375
> 19.98	31.36	24,45% to 38,93%	75.59	71,63% to 79,25%	53.475
> 20.02	30.77	23,91% to 38,32%	75.59	71,63% to 79,25%	53.18
> 20.07	30.77	23,91% to 38,32%	75.78	71,83% to 79,43%	53.275
> 20.11	30.18	23,37% to 37,7%	75.78	71,83% to 79,43%	52.98
> 20.13	30.18	23,37% to 37,7%	75.98	72,03% to 79,62%	53.08
> 20.22	30.18	23,37% to 37,7%	76.17	72,24% to 79,8%	53.175
> 20.38	30.18	23,37% to 37,7%	76.37	72,44% to 79,98%	53.275
> 20.62	30.18	23,37% to 37,7%	76.56	72,65% to 80,17%	53.37
> 20.84	30.18	23,37% to 37,7%	76.76	72,85% to 80,35%	53.47
> 20.9	30.18	23,37% to 37,7%	76.95	73,06% to 80,53%	53.565
> 20.94	29.59	22,82% to 37,08%	76.95	73,06% to 80,53%	53.27
> 20.98	28.99	22,28% to 36,46%	77.15	73,26% to 80,72%	53.07
> 21.06	28.99	22,28% to 36,46%	77.34	73,47% to 80,9%	53.165
> 21.19	28.99	22,28% to 36,46%	77.54	73,67% to 81,08%	53.265
> 21.29	28.4	21,74% to 35,84%	77.73	73,88% to 81,27%	53.065
> 21.32	28.4	21,74% to 35,84%	77.93	74,08% to 81,45%	53.165
> 21.57	28.4	21,74% to 35,84%	78.13	74,29% to 81,63%	53.265
> 21.83	27.81	21,2% to 35,21%	78.13	74,29% to 81,63%	52.97
> 22.05	27.22	20,67% to 34,59%	78.13	74,29% to 81,63%	52.675
> 22.27	27.22	20,67% to 34,59%	78.32	74,49% to 81,82%	52.77
> 22.35	27.22	20,67% to 34,59%	78.52	74,7% to 82%	52.87
> 22.42	26.63	20,13% to 33,96%	78.52	74,7% to 82%	52.575
> 22.44	26.04	19,6% to 33,33%	78.71	74,91% to 82,18%	52.375
> 22.56	25.44	19,07% to 32,7%	78.71	74,91% to 82,18%	52.075
> 22.73	25.44	19,07% to 32,7%	78.91	75,11% to 82,36%	52.175
> 22.79	25.44	19,07% to 32,7%	79.1	75,32% to 82,54%	52.27
> 22.89	25.44	19,07% to 32,7%	79.3	75,52% to 82,73%	52.37
> 23.05	24.85	18,54% to 32,07%	79.3	75,52% to 82,73%	52.075
> 23.16	24.26	18,01% to 31,44%	79.3	75,52% to 82,73%	51.78
> 23.27	23.67	17,48% to 30,81%	79.49	75,73% to 82,91%	51.58
> 23.36	23.67	17,48% to 30,81%	79.69	75,94% to 83,09%	51.68
> 23.49	23.67	17,48% to 30,81%	79.88	76,14% to 83,27%	51.775
> 23.59	23.67	17,48% to 30,81%	80.08	76,35% to 83,45%	51.875
> 23.74	23.67	17,48% to 30,81%	80.27	76,56% to 83,63%	51.97
> 23.93	23.67	17,48% to 30,81%	80.47	76,77% to 83,82%	52.07
> 24.01	23.67	17,48% to 30,81%	80.66	76,97% to 84%	52.165
> 24.07	23.67	17,48% to 30,81%	80.86	77,18% to 84,18%	52.265
> 24.14	23.08	16,95% to 30,17%	80.86	77,18% to 84,18%	51.97
> 24.25	23.08	16,95% to 30,17%	81.05	77,39% to 84,36%	52.065
> 24.34	23.08	16,95% to 30,17%	81.25	77,59% to 84,54%	52.165
> 24.41	22.49	16,43% to 29,53%	81.25	77,59% to 84,54%	51.87
> 24.48	21.89	15,91% to 28,89%	81.25	77,59% to 84,54%	51.57
> 24.51	21.89	15,91% to 28,89%	81.45	77,8% to 84,72%	51.67
> 24.59	21.89	15,91% to 28,89%	81.64	78,01% to 84,9%	51.765
> 24.68	21.89	15,91% to 28,89%	81.84	78,22% to 85,08%	51.865
> 24.71	21.89	15,91% to 28,89%	82.03	78,43% to 85,26%	51.96
> 24.74	21.89	15,91% to 28,89%	82.23	78,63% to 85,44%	52.06
> 24.84	21.89	15,91% to 28,89%	82.42	78,84% to 85,62%	52.155
> 25.02	21.89	15,91% to 28,89%	82.62	79,05% to 85,8%	52.255
> 25.15	21.89	15,91% to 28,89%	82.81	79,26% to 85,98%	52.35
> 25.18	21.89	15,91% to 28,89%	83.01	79,47% to 86,16%	52.45
> 25.24	21.3	15,39% to 28,25%	83.2	79,68% to 86,34%	52.25
> 25.34	21.3	15,39% to 28,25%	83.4	79,89% to 86,52%	52.35
> 25.48	21.3	15,39% to 28,25%	83.59	80,1% to 86,7%	52.445
> 25.57	21.3	15,39% to 28,25%	83.79	80,31% to 86,88%	52.545
> 25.64	20.71	14,87% to 27,61%	83.79	80,31% to 86,88%	52.25
> 25.86	20.71	14,87% to 27,61%	83.98	80,52% to 87,05%	52.345
> 26.04	20.12	14,35% to 26,96%	83.98	80,52% to 87,05%	52.05
> 26.15	19.53	13,84% to 26,31%	83.98	80,52% to 87,05%	51.755
> 26.25	18.93	13,33% to 25,67%	83.98	80,52% to 87,05%	51.455
> 26.39	18.34	12,82% to 25,01%	83.98	80,52% to 87,05%	51.16
> 26.62	18.34	12,82% to 25,01%	84.18	80,73% to 87,23%	51.26
> 26.76	17.75	12,31% to 24,36%	84.38	80,94% to 87,41%	51.065
> 26.92	17.75	12,31% to 24,36%	84.57	81,15% to 87,59%	51.16
> 27.2	17.16	11,8% to 23,71%	84.57	81,15% to 87,59%	50.865
> 27.47	17.16	11,8% to 23,71%	84.77	81,36% to 87,77%	50.965
> 27.83	16.57	11,3% to 23,05%	84.77	81,36% to 87,77%	50.67
> 28.23	16.57	11,3% to 23,05%	84.96	81,57% to 87,95%	50.765
> 28.48	16.57	11,3% to 23,05%	85.16	81,78% to 88,12%	50.865
> 28.65	16.57	11,3% to 23,05%	85.35	81,99% to 88,3%	50.96
> 28.75	16.57	11,3% to 23,05%	85.55	82,2% to 88,48%	51.06
> 28.82	16.57	11,3% to 23,05%	85.74	82,41% to 88,65%	51.155
> 28.99	16.57	11,3% to 23,05%	85.94	82,62% to 88,83%	51.255
> 29.14	15.98	10,8% to 22,39%	85.94	82,62% to 88,83%	50.96
> 29.2	15.98	10,8% to 22,39%	86.13	82,83% to 89,01%	51.055
> 29.33	15.38	10,3% to 21,72%	86.13	82,83% to 89,01%	50.755
> 29.54	14.79	9,808% to 21,06%	86.13	82,83% to 89,01%	50.46
> 29.83	14.2	9,316% to 20,39%	86.13	82,83% to 89,01%	50.165
> 30.07	13.61	8,827% to 19,72%	86.13	82,83% to 89,01%	49.87
> 30.32	13.61	8,827% to 19,72%	86.33	83,04% to 89,18%	49.97
> 30.91	13.02	8,341% to 19,04%	86.33	83,04% to 89,18%	49.675
> 31.46	12.43	7,859% to 18,37%	86.33	83,04% to 89,18%	49.38
> 31.65	12.43	7,859% to 18,37%	86.52	83,26% to 89,36%	49.475
> 31.77	12.43	7,859% to 18,37%	86.72	83,47% to 89,54%	49.575
> 32	12.43	7,859% to 18,37%	86.91	83,68% to 89,71%	49.67
> 32.18	11.83	7,381% to 17,68%	86.91	83,68% to 89,71%	49.37
> 32.27	11.24	6,906% to 17%	86.91	83,68% to 89,71%	49.075
> 32.35	10.65	6,436% to 16,31%	86.91	83,68% to 89,71%	48.78
> 32.39	10.65	6,436% to 16,31%	87.11	83,89% to 89,89%	48.88
> 32.53	10.06	5,97% to 15,62%	87.11	83,89% to 89,89%	48.585
> 32.65	9.467	5,509% to 14,92%	87.11	83,89% to 89,89%	48.2885
> 32.94	9.467	5,509% to 14,92%	87.3	84,11% to 90,06%	48.3835
> 33.53	8.876	5,053% to 14,22%	87.3	84,11% to 90,06%	48.088
> 34.14	8.876	5,053% to 14,22%	87.5	84,32% to 90,24%	48.188
> 34.49	8.876	5,053% to 14,22%	87.7	84,53% to 90,41%	48.288
> 34.67	8.876	5,053% to 14,22%	87.89	84,75% to 90,59%	48.383
> 35.08	8.876	5,053% to 14,22%	88.09	84,96% to 90,76%	48.483
> 35.39	8.876	5,053% to 14,22%	88.28	85,17% to 90,94%	48.578
> 35.65	8.876	5,053% to 14,22%	88.48	85,39% to 91,11%	48.678
> 35.91	8.876	5,053% to 14,22%	88.67	85,6% to 91,28%	48.773
> 36	8.876	5,053% to 14,22%	88.87	85,82% to 91,46%	48.873
> 36.52	8.876	5,053% to 14,22%	89.06	86,03% to 91,63%	48.968
> 37.27	8.876	5,053% to 14,22%	89.26	86,25% to 91,8%	49.068
> 37.79	8.876	5,053% to 14,22%	89.45	86,46% to 91,98%	49.163
> 38.08	8.876	5,053% to 14,22%	89.65	86,68% to 92,15%	49.263
> 38.42	8.876	5,053% to 14,22%	89.84	86,9% to 92,32%	49.358
> 38.82	8.284	4,603% to 13,51%	89.84	86,9% to 92,32%	49.062
> 39.19	7.692	4,159% to 12,79%	89.84	86,9% to 92,32%	48.766
> 39.56	7.692	4,159% to 12,79%	90.04	87,11% to 92,49%	48.866
> 39.7	7.101	3,723% to 12,07%	90.04	87,11% to 92,49%	48.5705
> 39.78	6.509	3,294% to 11,35%	90.04	87,11% to 92,49%	48.2745
> 40.31	6.509	3,294% to 11,35%	90.23	87,33% to 92,66%	48.3695
> 41.07	6.509	3,294% to 11,35%	90.43	87,55% to 92,84%	48.4695
> 41.43	6.509	3,294% to 11,35%	90.63	87,76% to 93,01%	48.5695
> 41.52	6.509	3,294% to 11,35%	90.82	87,98% to 93,18%	48.6645
> 41.84	6.509	3,294% to 11,35%	91.02	88,2% to 93,35%	48.7645
> 42.17	5.917	2,874% to 10,61%	91.02	88,2% to 93,35%	48.4685
> 42.39	5.917	2,874% to 10,61%	91.21	88,42% to 93,52%	48.5635
> 42.6	5.917	2,874% to 10,61%	91.41	88,63% to 93,69%	48.6635
> 42.98	5.917	2,874% to 10,61%	91.6	88,85% to 93,86%	48.7585
> 43.54	5.325	2,464% to 9,868%	91.6	88,85% to 93,86%	48.4625
> 43.74	5.325	2,464% to 9,868%	91.8	89,07% to 94,02%	48.5625
> 43.89	5.325	2,464% to 9,868%	91.99	89,29% to 94,19%	48.6575
> 44.14	5.325	2,464% to 9,868%	92.19	89,51% to 94,36%	48.7575
> 44.68	5.325	2,464% to 9,868%	92.38	89,73% to 94,53%	48.8525
> 45.36	5.325	2,464% to 9,868%	92.58	89,95% to 94,69%	48.9525
> 45.98	5.325	2,464% to 9,868%	92.77	90,18% to 94,86%	49.0475
> 46.47	5.325	2,464% to 9,868%	92.97	90,4% to 95,03%	49.1475
> 46.69	5.325	2,464% to 9,868%	93.16	90,62% to 95,19%	49.2425
> 46.95	5.325	2,464% to 9,868%	93.36	90,84% to 95,36%	49.3425
> 47.19	5.325	2,464% to 9,868%	93.55	91,07% to 95,52%	49.4375
> 47.73	5.325	2,464% to 9,868%	93.75	91,29% to 95,69%	49.5375
> 48.24	5.325	2,464% to 9,868%	93.95	91,52% to 95,85%	49.6375
> 48.58	4.734	2,066% to 9,114%	93.95	91,52% to 95,85%	49.342
> 48.91	4.734	2,066% to 9,114%	94.14	91,74% to 96,01%	49.437
> 49.21	4.734	2,066% to 9,114%	94.34	91,97% to 96,17%	49.537
> 50.15	4.734	2,066% to 9,114%	94.53	92,19% to 96,34%	49.632
> 50.91	4.734	2,066% to 9,114%	94.73	92,42% to 96,5%	49.732
> 51.55	4.142	1,681% to 8,348%	94.73	92,42% to 96,5%	49.436
> 52.22	4.142	1,681% to 8,348%	94.92	92,65% to 96,66%	49.531
> 52.38	4.142	1,681% to 8,348%	95.12	92,88% to 96,82%	49.631
> 52.46	4.142	1,681% to 8,348%	95.31	93,11% to 96,97%	49.726
> 52.5	4.142	1,681% to 8,348%	95.51	93,34% to 97,13%	49.826
> 53.26	4.142	1,681% to 8,348%	95.7	93,57% to 97,29%	49.921
> 55.8	4.142	1,681% to 8,348%	95.9	93,8% to 97,44%	50.021
> 57.64	4.142	1,681% to 8,348%	96.09	94,03% to 97,6%	50.116
> 58.68	3.55	1,314% to 7,567%	96.09	94,03% to 97,6%	49.82
> 59.82	3.55	1,314% to 7,567%	96.29	94,27% to 97,75%	49.92
> 60.74	2.959	0,9675% to 6,769%	96.29	94,27% to 97,75%	49.6245
> 61.74	2.959	0,9675% to 6,769%	96.48	94,5% to 97,9%	49.7195
> 64.33	2.367	0,6486% to 5,949%	96.48	94,5% to 97,9%	49.4235
> 67.01	2.367	0,6486% to 5,949%	96.68	94,74% to 98,05%	49.5235
> 67.35	2.367	0,6486% to 5,949%	96.88	94,97% to 98,2%	49.6235
> 67.58	2.367	0,6486% to 5,949%	97.07	95,21% to 98,35%	49.7185
> 68.5	2.367	0,6486% to 5,949%	97.27	95,45% to 98,5%	49.8185
> 69.43	2.367	0,6486% to 5,949%	97.46	95,7% to 98,64%	49.9135
> 69.97	2.367	0,6486% to 5,949%	97.66	95,94% to 98,78%	50.0135
> 70.45	1.775	0,3676% to 5,1%	97.66	95,94% to 98,78%	49.7175
> 70.66	1.775	0,3676% to 5,1%	97.85	96,19% to 98,92%	49.8125
> 71.12	1.775	0,3676% to 5,1%	98.05	96,44% to 99,06%	49.9125
> 73.3	1.775	0,3676% to 5,1%	98.24	96,69% to 99,19%	50.0075
> 76.01	1.775	0,3676% to 5,1%	98.44	96,94% to 99,32%	50.1075
> 80.3	1.775	0,3676% to 5,1%	98.63	97,2% to 99,45%	50.2025
> 85.81	1.775	0,3676% to 5,1%	98.83	97,47% to 99,57%	50.3025
> 88.27	1.775	0,3676% to 5,1%	99.02	97,74% to 99,68%	50.3975
> 88.74	1.183	0,1436% to 4,209%	99.02	97,74% to 99,68%	50.1015
> 91.15	1.183	0,1436% to 4,209%	99.22	98,01% to 99,79%	50.2015
> 95.03	1.183	0,1436% to 4,209%	99.41	98,3% to 99,88%	50.2965
> 97.27	0.5917	0,01498% to 3,253%	99.41	98,3% to 99,88%	50.0008
> 100.4	0.5917	0,01498% to 3,253%	99.61	98,6% to 99,95%	50.1009
> 104.2	0.5917	0,01498% to 3,253%	99.8	98,92% to 100%	50.1959
> 107.6	0.5917	0,01498% to 3,253%	100	99,28% to 100%	50.2959

## Sheet: NGP (TG2+) IgG
Cut off	Sensitivity%	95% CI	Specificity%	95% CI	Accuracy%
> 0.03	100	86,28% to 100%	0.1953	0,004945% to 1,083%	50.0977
> 0.06	100	86,28% to 100%	0.3906	0,04734% to 1,404%	50.1953
> 0.095	100	86,28% to 100%	0.5859	0,121% to 1,703%	50.2929
> 0.125	100	86,28% to 100%	0.7813	0,2133% to 1,988%	50.3907
> 0.145	100	86,28% to 100%	0.9766	0,3178% to 2,264%	50.4883
> 0.17	100	86,28% to 100%	1.172	0,4312% to 2,533%	50.586
> 0.19	100	86,28% to 100%	1.367	0,5514% to 2,797%	50.6835
> 0.21	100	86,28% to 100%	1.563	0,6769% to 3,055%	50.7815
> 0.23	100	86,28% to 100%	1.758	0,8069% to 3,311%	50.879
> 0.265	100	86,28% to 100%	2.148	1,077% to 3,812%	51.074
> 0.295	100	86,28% to 100%	2.539	1,359% to 4,303%	51.2695
> 0.31	100	86,28% to 100%	3.125	1,797% to 5,025%	51.5625
> 0.325	100	86,28% to 100%	3.516	2,097% to 5,499%	51.758
> 0.34	100	86,28% to 100%	3.711	2,249% to 5,735%	51.8555
> 0.36	100	86,28% to 100%	4.102	2,557% to 6,202%	52.051
> 0.395	100	86,28% to 100%	4.297	2,712% to 6,433%	52.1485
> 0.425	100	86,28% to 100%	4.492	2,869% to 6,664%	52.246
> 0.44	100	86,28% to 100%	4.688	3,026% to 6,895%	52.344
> 0.455	100	86,28% to 100%	4.883	3,184% to 7,124%	52.4415
> 0.48	100	86,28% to 100%	5.078	3,344% to 7,352%	52.539
> 0.505	100	86,28% to 100%	5.469	3,664% to 7,807%	52.7345
> 0.55	100	86,28% to 100%	5.664	3,826% to 8,034%	52.832
> 0.645	100	86,28% to 100%	5.859	3,988% to 8,259%	52.9295
> 0.71	100	86,28% to 100%	6.25	4,314% to 8,709%	53.125
> 0.745	100	86,28% to 100%	6.445	4,478% to 8,933%	53.2225
> 0.775	100	86,28% to 100%	6.641	4,642% to 9,156%	53.3205
> 0.805	100	86,28% to 100%	6.836	4,807% to 9,379%	53.418
> 0.875	100	86,28% to 100%	7.031	4,973% to 9,602%	53.5155
> 0.93	100	86,28% to 100%	7.227	5,139% to 9,824%	53.6135
> 0.955	100	86,28% to 100%	7.422	5,305% to 10,05%	53.711
> 0.975	100	86,28% to 100%	7.617	5,472% to 10,27%	53.8085
> 0.985	100	86,28% to 100%	8.008	5,808% to 10,71%	54.004
> 1.005	100	86,28% to 100%	8.203	5,976% to 10,93%	54.1015
> 1.025	100	86,28% to 100%	8.398	6,145% to 11,15%	54.199
> 1.04	100	86,28% to 100%	8.594	6,314% to 11,37%	54.297
> 1.06	100	86,28% to 100%	8.789	6,483% to 11,58%	54.3945
> 1.095	100	86,28% to 100%	8.984	6,653% to 11,8%	54.492
> 1.135	100	86,28% to 100%	9.18	6,823% to 12,02%	54.59
> 1.175	100	86,28% to 100%	9.57	7,164% to 12,45%	54.785
> 1.225	100	86,28% to 100%	9.766	7,335% to 12,67%	54.883
> 1.28	100	86,28% to 100%	9.961	7,507% to 12,89%	54.9805
> 1.37	100	86,28% to 100%	10.16	7,679% to 13,1%	55.08
> 1.465	100	86,28% to 100%	10.35	7,851% to 13,32%	55.175
> 1.505	100	86,28% to 100%	10.55	8,023% to 13,54%	55.275
> 1.63	100	86,28% to 100%	10.74	8,196% to 13,75%	55.37
> 1.785	100	86,28% to 100%	10.94	8,368% to 13,97%	55.47
> 1.83	100	86,28% to 100%	11.13	8,542% to 14,18%	55.565
> 1.895	100	86,28% to 100%	11.33	8,715% to 14,4%	55.665
> 1.955	100	86,28% to 100%	11.52	8,889% to 14,61%	55.76
> 1.98	100	86,28% to 100%	11.72	9,063% to 14,83%	55.86
> 2.025	100	86,28% to 100%	12.11	9,411% to 15,25%	56.055
> 2.055	100	86,28% to 100%	12.3	9,586% to 15,47%	56.15
> 2.085	100	86,28% to 100%	12.5	9,761% to 15,68%	56.25
> 2.16	100	86,28% to 100%	12.7	9,936% to 15,89%	56.35
> 2.22	100	86,28% to 100%	12.89	10,11% to 16,11%	56.445
> 2.25	100	86,28% to 100%	13.28	10,46% to 16,53%	56.64
> 2.355	100	86,28% to 100%	13.48	10,64% to 16,74%	56.74
> 2.46	100	86,28% to 100%	13.67	10,82% to 16,96%	56.835
> 2.515	100	86,28% to 100%	13.87	10,99% to 17,17%	56.935
> 2.615	100	86,28% to 100%	14.06	11,17% to 17,38%	57.03
> 2.725	100	86,28% to 100%	14.26	11,35% to 17,59%	57.13
> 2.78	100	86,28% to 100%	14.45	11,52% to 17,8%	57.225
> 2.82	100	86,28% to 100%	14.65	11,7% to 18,01%	57.325
> 2.855	100	86,28% to 100%	14.84	11,88% to 18,22%	57.42
> 2.895	100	86,28% to 100%	15.23	12,23% to 18,64%	57.615
> 2.955	100	86,28% to 100%	15.43	12,41% to 18,85%	57.715
> 2.985	100	86,28% to 100%	15.63	12,59% to 19,06%	57.815
> 2.995	100	86,28% to 100%	15.82	12,77% to 19,27%	57.91
> 3.02	100	86,28% to 100%	16.21	13,12% to 19,69%	58.105
> 3.08	100	86,28% to 100%	16.41	13,3% to 19,9%	58.205
> 3.13	100	86,28% to 100%	16.6	13,48% to 20,11%	58.3
> 3.155	100	86,28% to 100%	16.8	13,66% to 20,32%	58.4
> 3.185	100	86,28% to 100%	16.99	13,84% to 20,53%	58.495
> 3.22	100	86,28% to 100%	17.19	14,02% to 20,74%	58.595
> 3.255	100	86,28% to 100%	17.38	14,2% to 20,95%	58.69
> 3.31	100	86,28% to 100%	17.58	14,38% to 21,16%	58.79
> 3.365	100	86,28% to 100%	17.97	14,74% to 21,57%	58.985
> 3.405	100	86,28% to 100%	18.16	14,92% to 21,78%	59.08
> 3.445	100	86,28% to 100%	18.36	15,1% to 21,99%	59.18
> 3.49	100	86,28% to 100%	18.55	15,28% to 22,2%	59.275
> 3.53	100	86,28% to 100%	18.75	15,46% to 22,41%	59.375
> 3.555	100	86,28% to 100%	18.95	15,64% to 22,61%	59.475
> 3.58	100	86,28% to 100%	19.14	15,82% to 22,82%	59.57
> 3.61	100	86,28% to 100%	19.34	16% to 23,03%	59.67
> 3.695	100	86,28% to 100%	19.53	16,18% to 23,23%	59.765
> 3.795	100	86,28% to 100%	19.73	16,37% to 23,44%	59.865
> 3.975	100	86,28% to 100%	19.92	16,55% to 23,65%	59.96
> 4.19	100	86,28% to 100%	20.12	16,73% to 23,86%	60.06
> 4.275	100	86,28% to 100%	20.31	16,91% to 24,06%	60.155
> 4.315	100	86,28% to 100%	20.51	17,09% to 24,27%	60.255
> 4.38	100	86,28% to 100%	20.7	17,27% to 24,48%	60.35
> 4.475	100	86,28% to 100%	20.9	17,46% to 24,68%	60.45
> 4.54	100	86,28% to 100%	21.09	17,64% to 24,89%	60.545
> 4.56	100	86,28% to 100%	21.29	17,82% to 25,09%	60.645
> 4.735	100	86,28% to 100%	21.48	18% to 25,3%	60.74
> 4.915	100	86,28% to 100%	21.68	18,18% to 25,51%	60.84
> 4.96	100	86,28% to 100%	21.88	18,37% to 25,71%	60.94
> 5.105	100	86,28% to 100%	22.07	18,55% to 25,92%	61.035
> 5.26	100	86,28% to 100%	22.46	18,92% to 26,33%	61.23
> 5.305	100	86,28% to 100%	22.66	19,1% to 26,53%	61.33
> 5.34	100	86,28% to 100%	22.85	19,28% to 26,74%	61.425
> 5.38	100	86,28% to 100%	23.05	19,47% to 26,94%	61.525
> 5.425	100	86,28% to 100%	23.24	19,65% to 27,15%	61.62
> 5.48	100	86,28% to 100%	23.44	19,83% to 27,35%	61.72
> 5.505	100	86,28% to 100%	23.63	20,02% to 27,56%	61.815
> 5.64	100	86,28% to 100%	23.83	20,2% to 27,76%	61.915
> 5.845	100	86,28% to 100%	24.02	20,38% to 27,97%	62.01
> 6	100	86,28% to 100%	24.22	20,57% to 28,17%	62.11
> 6.105	100	86,28% to 100%	24.41	20,75% to 28,37%	62.205
> 6.14	100	86,28% to 100%	24.61	20,94% to 28,58%	62.305
> 6.17	100	86,28% to 100%	24.8	21,12% to 28,78%	62.4
> 6.24	100	86,28% to 100%	25	21,31% to 28,99%	62.5
> 6.44	100	86,28% to 100%	25.2	21,49% to 29,19%	62.6
> 6.63	100	86,28% to 100%	25.39	21,67% to 29,39%	62.695
> 6.73	100	86,28% to 100%	25.59	21,86% to 29,6%	62.795
> 6.845	100	86,28% to 100%	25.78	22,04% to 29,8%	62.89
> 7.01	100	86,28% to 100%	25.98	22,23% to 30%	62.99
> 7.15	100	86,28% to 100%	26.17	22,41% to 30,21%	63.085
> 7.265	100	86,28% to 100%	26.37	22,6% to 30,41%	63.185
> 7.44	100	86,28% to 100%	26.56	22,78% to 30,61%	63.28
> 7.7	100	86,28% to 100%	26.76	22,97% to 30,82%	63.38
> 7.9	100	86,28% to 100%	26.95	23,15% to 31,02%	63.475
> 7.955	100	86,28% to 100%	27.15	23,34% to 31,22%	63.575
> 8.1	100	86,28% to 100%	27.54	23,71% to 31,63%	63.77
> 8.29	100	86,28% to 100%	27.73	23,9% to 31,83%	63.865
> 8.375	100	86,28% to 100%	27.93	24,08% to 32,03%	63.965
> 8.47	100	86,28% to 100%	28.13	24,27% to 32,24%	64.065
> 8.56	100	86,28% to 100%	28.32	24,45% to 32,44%	64.16
> 8.58	100	86,28% to 100%	28.52	24,64% to 32,64%	64.26
> 8.665	100	86,28% to 100%	28.71	24,83% to 32,84%	64.355
> 8.78	100	86,28% to 100%	28.91	25,01% to 33,04%	64.455
> 8.87	100	86,28% to 100%	29.3	25,39% to 33,45%	64.65
> 8.955	100	86,28% to 100%	29.49	25,57% to 33,65%	64.745
> 9.04	100	86,28% to 100%	29.69	25,76% to 33,85%	64.845
> 9.24	100	86,28% to 100%	29.88	25,95% to 34,05%	64.94
> 9.57	100	86,28% to 100%	30.08	26,13% to 34,26%	65.04
> 9.815	100	86,28% to 100%	30.27	26,32% to 34,46%	65.135
> 9.92	100	86,28% to 100%	30.47	26,51% to 34,66%	65.235
> 9.985	100	86,28% to 100%	30.66	26,69% to 34,86%	65.33
> 10.18	100	86,28% to 100%	30.86	26,88% to 35,06%	65.43
> 10.37	100	86,28% to 100%	31.05	27,07% to 35,26%	65.525
> 10.42	100	86,28% to 100%	31.25	27,26% to 35,46%	65.625
> 10.52	100	86,28% to 100%	31.45	27,44% to 35,66%	65.725
> 10.75	100	86,28% to 100%	31.64	27,63% to 35,86%	65.82
> 10.89	100	86,28% to 100%	31.84	27,82% to 36,06%	65.92
> 10.92	100	86,28% to 100%	32.03	28,01% to 36,27%	66.015
> 10.95	100	86,28% to 100%	32.23	28,19% to 36,47%	66.115
> 11.09	100	86,28% to 100%	32.62	28,57% to 36,87%	66.31
> 11.22	100	86,28% to 100%	32.81	28,76% to 37,07%	66.405
> 11.24	100	86,28% to 100%	33.01	28,95% to 37,27%	66.505
> 11.35	100	86,28% to 100%	33.2	29,13% to 37,47%	66.6
> 11.48	100	86,28% to 100%	33.4	29,32% to 37,67%	66.7
> 11.51	100	86,28% to 100%	33.59	29,51% to 37,87%	66.795
> 11.57	100	86,28% to 100%	33.79	29,7% to 38,07%	66.895
> 11.73	100	86,28% to 100%	33.98	29,89% to 38,27%	66.99
> 11.85	100	86,28% to 100%	34.18	30,08% to 38,47%	67.09
> 12.04	100	86,28% to 100%	34.38	30,26% to 38,67%	67.19
> 12.3	100	86,28% to 100%	34.57	30,45% to 38,87%	67.285
> 12.45	100	86,28% to 100%	34.77	30,64% to 39,07%	67.385
> 12.56	100	86,28% to 100%	35.16	31,02% to 39,47%	67.58
> 12.69	100	86,28% to 100%	35.35	31,21% to 39,67%	67.675
> 12.79	100	86,28% to 100%	35.74	31,59% to 40,06%	67.87
> 12.83	100	86,28% to 100%	35.94	31,78% to 40,26%	67.97
> 12.94	100	86,28% to 100%	36.13	31,96% to 40,46%	68.065
> 13.11	100	86,28% to 100%	36.33	32,15% to 40,66%	68.165
> 13.25	100	86,28% to 100%	36.52	32,34% to 40,86%	68.26
> 13.47	100	86,28% to 100%	36.72	32,53% to 41,06%	68.36
> 13.64	100	86,28% to 100%	36.91	32,72% to 41,26%	68.455
> 13.7	100	86,28% to 100%	37.11	32,91% to 41,46%	68.555
> 13.75	100	86,28% to 100%	37.3	33,1% to 41,66%	68.65
> 13.83	100	86,28% to 100%	37.5	33,29% to 41,85%	68.75
> 13.95	100	86,28% to 100%	37.7	33,48% to 42,05%	68.85
> 14.06	100	86,28% to 100%	37.89	33,67% to 42,25%	68.945
> 14.15	100	86,28% to 100%	38.09	33,86% to 42,45%	69.045
> 14.26	100	86,28% to 100%	38.28	34,05% to 42,65%	69.14
> 14.42	100	86,28% to 100%	38.48	34,24% to 42,85%	69.24
> 14.62	100	86,28% to 100%	38.67	34,43% to 43,04%	69.335
> 14.75	100	86,28% to 100%	38.87	34,62% to 43,24%	69.435
> 14.8	100	86,28% to 100%	39.06	34,81% to 43,44%	69.53
> 14.93	100	86,28% to 100%	39.26	35% to 43,64%	69.63
> 15.21	100	86,28% to 100%	39.45	35,19% to 43,84%	69.725
> 15.45	100	86,28% to 100%	39.65	35,38% to 44,03%	69.825
> 15.55	100	86,28% to 100%	39.84	35,57% to 44,23%	69.92
> 15.59	100	86,28% to 100%	40.23	35,96% to 44,63%	70.115
> 15.62	100	86,28% to 100%	40.43	36,15% to 44,82%	70.215
> 15.73	100	86,28% to 100%	40.63	36,34% to 45,02%	70.315
> 15.88	100	86,28% to 100%	40.82	36,53% to 45,22%	70.41
> 15.99	100	86,28% to 100%	41.02	36,72% to 45,42%	70.51
> 16.04	100	86,28% to 100%	41.21	36,91% to 45,61%	70.605
> 16.09	100	86,28% to 100%	41.41	37,1% to 45,81%	70.705
> 16.13	100	86,28% to 100%	41.6	37,29% to 46,01%	70.8
> 16.17	100	86,28% to 100%	41.8	37,49% to 46,2%	70.9
> 16.29	100	86,28% to 100%	41.99	37,68% to 46,4%	70.995
> 16.38	100	86,28% to 100%	42.19	37,87% to 46,6%	71.095
> 16.39	100	86,28% to 100%	42.38	38,06% to 46,79%	71.19
> 16.42	100	86,28% to 100%	42.58	38,25% to 46,99%	71.29
> 16.57	100	86,28% to 100%	42.77	38,44% to 47,19%	71.385
> 16.73	100	86,28% to 100%	42.97	38,63% to 47,38%	71.485
> 16.84	100	86,28% to 100%	43.16	38,83% to 47,58%	71.58
> 17.04	100	86,28% to 100%	43.36	39,02% to 47,78%	71.68
> 17.29	100	86,28% to 100%	43.55	39,21% to 47,97%	71.775
> 17.43	100	86,28% to 100%	43.75	39,4% to 48,17%	71.875
> 17.44	100	86,28% to 100%	43.95	39,59% to 48,37%	71.975
> 17.45	100	86,28% to 100%	44.14	39,79% to 48,56%	72.07
> 17.54	100	86,28% to 100%	44.34	39,98% to 48,76%	72.17
> 17.66	100	86,28% to 100%	44.53	40,17% to 48,95%	72.265
> 17.71	100	86,28% to 100%	44.73	40,36% to 49,15%	72.365
> 17.97	100	86,28% to 100%	44.92	40,56% to 49,35%	72.46
> 18.32	100	86,28% to 100%	45.12	40,75% to 49,54%	72.56
> 18.42	100	86,28% to 100%	45.31	40,94% to 49,74%	72.655
> 18.46	100	86,28% to 100%	45.51	41,13% to 49,93%	72.755
> 18.62	100	86,28% to 100%	45.7	41,33% to 50,13%	72.85
> 18.75	100	86,28% to 100%	45.9	41,52% to 50,33%	72.95
> 18.86	100	86,28% to 100%	46.09	41,71% to 50,52%	73.045
> 18.99	100	86,28% to 100%	46.29	41,9% to 50,72%	73.145
> 19.07	100	86,28% to 100%	46.48	42,1% to 50,91%	73.24
> 19.18	100	86,28% to 100%	46.68	42,29% to 51,11%	73.34
> 19.44	100	86,28% to 100%	46.88	42,48% to 51,3%	73.44
> 19.7	100	86,28% to 100%	47.07	42,68% to 51,5%	73.535
> 19.83	100	86,28% to 100%	47.27	42,87% to 51,69%	73.635
> 19.97	100	86,28% to 100%	47.46	43,06% to 51,89%	73.73
> 20.1	100	86,28% to 100%	47.66	43,26% to 52,08%	73.83
> 20.18	100	86,28% to 100%	47.85	43,45% to 52,28%	73.925
> 20.25	100	86,28% to 100%	48.05	43,64% to 52,47%	74.025
> 20.34	100	86,28% to 100%	48.24	43,84% to 52,67%	74.12
> 20.72	100	86,28% to 100%	48.44	44,03% to 52,86%	74.22
> 21.04	100	86,28% to 100%	48.63	44,22% to 53,06%	74.315
> 21.13	100	86,28% to 100%	48.83	44,42% to 53,25%	74.415
> 21.24	100	86,28% to 100%	49.02	44,61% to 53,45%	74.51
> 21.28	100	86,28% to 100%	49.22	44,81% to 53,64%	74.61
> 21.47	100	86,28% to 100%	49.41	45% to 53,83%	74.705
> 21.73	100	86,28% to 100%	49.61	45,19% to 54,03%	74.805
> 21.94	100	86,28% to 100%	49.8	45,39% to 54,22%	74.9
> 22.12	100	86,28% to 100%	50	45,58% to 54,42%	75
> 22.28	100	86,28% to 100%	50.2	45,78% to 54,61%	75.1
> 22.44	100	86,28% to 100%	50.39	45,97% to 54,81%	75.195
> 22.54	100	86,28% to 100%	50.59	46,17% to 55%	75.295
> 22.63	100	86,28% to 100%	50.78	46,36% to 55,19%	75.39
> 22.7	100	86,28% to 100%	50.98	46,55% to 55,39%	75.49
> 22.8	100	86,28% to 100%	51.17	46,75% to 55,58%	75.585
> 22.92	100	86,28% to 100%	51.37	46,94% to 55,78%	75.685
> 23.15	100	86,28% to 100%	51.56	47,14% to 55,97%	75.78
> 23.34	100	86,28% to 100%	51.76	47,33% to 56,16%	75.88
> 23.37	100	86,28% to 100%	51.95	47,53% to 56,36%	75.975
> 23.46	100	86,28% to 100%	52.15	47,72% to 56,55%	76.075
> 23.6	100	86,28% to 100%	52.34	47,92% to 56,74%	76.17
> 23.72	100	86,28% to 100%	52.54	48,11% to 56,94%	76.27
> 23.82	100	86,28% to 100%	52.73	48,31% to 57,13%	76.365
> 23.97	100	86,28% to 100%	52.93	48,5% to 57,32%	76.465
> 24.18	100	86,28% to 100%	53.13	48,7% to 57,52%	76.565
> 24.33	100	86,28% to 100%	53.32	48,89% to 57,71%	76.66
> 24.44	100	86,28% to 100%	53.52	49,09% to 57,9%	76.76
> 24.56	100	86,28% to 100%	53.71	49,28% to 58,1%	76.855
> 24.69	100	86,28% to 100%	53.91	49,48% to 58,29%	76.955
> 24.77	100	86,28% to 100%	54.1	49,67% to 58,48%	77.05
> 24.78	100	86,28% to 100%	54.3	49,87% to 58,67%	77.15
> 24.82	100	86,28% to 100%	54.49	50,07% to 58,87%	77.245
> 24.93	100	86,28% to 100%	54.69	50,26% to 59,06%	77.345
> 25.07	100	86,28% to 100%	54.88	50,46% to 59,25%	77.44
> 25.2	100	86,28% to 100%	55.08	50,65% to 59,44%	77.54
> 25.3	100	86,28% to 100%	55.27	50,85% to 59,64%	77.635
> 25.36	100	86,28% to 100%	55.47	51,05% to 59,83%	77.735
> 25.66	100	86,28% to 100%	55.66	51,24% to 60,02%	77.83
> 26.09	100	86,28% to 100%	55.86	51,44% to 60,21%	77.93
> 26.3	100	86,28% to 100%	56.05	51,63% to 60,41%	78.025
> 26.39	100	86,28% to 100%	56.25	51,83% to 60,6%	78.125
> 26.49	100	86,28% to 100%	56.45	52,03% to 60,79%	78.225
> 26.74	100	86,28% to 100%	56.64	52,22% to 60,98%	78.32
> 27.14	100	86,28% to 100%	56.84	52,42% to 61,17%	78.42
> 27.43	100	86,28% to 100%	57.03	52,62% to 61,37%	78.515
> 27.51	100	86,28% to 100%	57.23	52,81% to 61,56%	78.615
> 27.56	100	86,28% to 100%	57.42	53,01% to 61,75%	78.71
> 27.64	100	86,28% to 100%	57.62	53,21% to 61,94%	78.81
> 27.75	100	86,28% to 100%	57.81	53,4% to 62,13%	78.905
> 27.9	100	86,28% to 100%	58.01	53,6% to 62,32%	79.005
> 28.09	100	86,28% to 100%	58.2	53,8% to 62,51%	79.1
> 28.47	100	86,28% to 100%	58.4	53,99% to 62,71%	79.2
> 28.81	100	86,28% to 100%	58.59	54,19% to 62,9%	79.295
> 28.91	100	86,28% to 100%	58.79	54,39% to 63,09%	79.395
> 28.96	100	86,28% to 100%	58.98	54,58% to 63,28%	79.49
> 29.08	100	86,28% to 100%	59.18	54,78% to 63,47%	79.59
> 29.29	100	86,28% to 100%	59.38	54,98% to 63,66%	79.69
> 29.42	100	86,28% to 100%	59.57	55,18% to 63,85%	79.785
> 29.45	100	86,28% to 100%	59.77	55,37% to 64,04%	79.885
> 29.79	100	86,28% to 100%	59.96	55,57% to 64,23%	79.98
> 30.13	100	86,28% to 100%	60.16	55,77% to 64,43%	80.08
> 30.35	100	86,28% to 100%	60.35	55,97% to 64,62%	80.175
> 30.7	100	86,28% to 100%	60.55	56,16% to 64,81%	80.275
> 31.01	100	86,28% to 100%	60.94	56,56% to 65,19%	80.47
> 31.19	100	86,28% to 100%	61.13	56,76% to 65,38%	80.565
> 31.26	100	86,28% to 100%	61.33	56,96% to 65,57%	80.665
> 31.61	100	86,28% to 100%	61.52	57,15% to 65,76%	80.76
> 32	100	86,28% to 100%	61.72	57,35% to 65,95%	80.86
> 32.11	100	86,28% to 100%	61.91	57,55% to 66,14%	80.955
> 32.17	100	86,28% to 100%	62.11	57,75% to 66,33%	81.055
> 32.25	100	86,28% to 100%	62.3	57,95% to 66,52%	81.15
> 32.58	100	86,28% to 100%	62.5	58,15% to 66,71%	81.25
> 32.99	100	86,28% to 100%	62.7	58,34% to 66,9%	81.35
> 33.24	100	86,28% to 100%	62.89	58,54% to 67,09%	81.445
> 33.56	100	86,28% to 100%	63.09	58,74% to 67,28%	81.545
> 33.94	100	86,28% to 100%	63.28	58,94% to 67,47%	81.64
> 34.16	100	86,28% to 100%	63.48	59,14% to 67,66%	81.74
> 34.23	100	86,28% to 100%	63.67	59,34% to 67,85%	81.835
> 34.32	100	86,28% to 100%	63.87	59,54% to 68,04%	81.935
> 34.43	100	86,28% to 100%	64.06	59,74% to 68,22%	82.03
> 34.57	100	86,28% to 100%	64.26	59,94% to 68,41%	82.13
> 34.72	100	86,28% to 100%	64.45	60,14% to 68,6%	82.225
> 34.8	100	86,28% to 100%	64.65	60,33% to 68,79%	82.325
> 34.84	96	79,65% to 99,9%	64.65	60,33% to 68,79%	80.325
> 35.54	96	79,65% to 99,9%	64.84	60,53% to 68,98%	80.42
> 36.23	96	79,65% to 99,9%	65.23	60,93% to 69,36%	80.615
> 36.29	96	79,65% to 99,9%	65.43	61,13% to 69,55%	80.715
> 36.51	96	79,65% to 99,9%	65.63	61,33% to 69,74%	80.815
> 36.68	96	79,65% to 99,9%	65.82	61,53% to 69,92%	80.91
> 36.7	96	79,65% to 99,9%	66.02	61,73% to 70,11%	81.01
> 36.79	96	79,65% to 99,9%	66.21	61,93% to 70,3%	81.105
> 36.99	96	79,65% to 99,9%	66.41	62,13% to 70,49%	81.205
> 37.26	96	79,65% to 99,9%	66.6	62,33% to 70,68%	81.3
> 37.54	96	79,65% to 99,9%	66.8	62,53% to 70,87%	81.4
> 37.73	96	79,65% to 99,9%	66.99	62,73% to 71,05%	81.495
> 37.81	96	79,65% to 99,9%	67.19	62,93% to 71,24%	81.595
> 37.91	96	79,65% to 99,9%	67.58	63,33% to 71,62%	81.79
> 38.02	96	79,65% to 99,9%	67.77	63,53% to 71,81%	81.885
> 38.19	96	79,65% to 99,9%	67.97	63,73% to 71,99%	81.985
> 38.57	96	79,65% to 99,9%	68.16	63,94% to 72,18%	82.08
> 38.85	96	79,65% to 99,9%	68.36	64,14% to 72,37%	82.18
> 39.06	96	79,65% to 99,9%	68.55	64,34% to 72,56%	82.275
> 39.33	96	79,65% to 99,9%	68.75	64,54% to 72,74%	82.375
> 39.49	96	79,65% to 99,9%	68.95	64,74% to 72,93%	82.475
> 39.72	96	79,65% to 99,9%	69.14	64,94% to 73,12%	82.57
> 39.92	96	79,65% to 99,9%	69.34	65,14% to 73,31%	82.67
> 40.15	96	79,65% to 99,9%	69.53	65,34% to 73,49%	82.765
> 40.5	96	79,65% to 99,9%	69.73	65,54% to 73,68%	82.865
> 40.7	96	79,65% to 99,9%	69.92	65,74% to 73,87%	82.96
> 40.78	96	79,65% to 99,9%	70.12	65,95% to 74,05%	83.06
> 40.91	96	79,65% to 99,9%	70.31	66,15% to 74,24%	83.155
> 41.06	96	79,65% to 99,9%	70.51	66,35% to 74,43%	83.255
> 41.39	96	79,65% to 99,9%	70.7	66,55% to 74,61%	83.35
> 41.8	96	79,65% to 99,9%	70.9	66,75% to 74,8%	83.45
> 42.21	96	79,65% to 99,9%	71.09	66,96% to 74,99%	83.545
> 42.51	96	79,65% to 99,9%	71.29	67,16% to 75,17%	83.645
> 42.79	96	79,65% to 99,9%	71.68	67,56% to 75,55%	83.84
> 43.15	96	79,65% to 99,9%	71.88	67,76% to 75,73%	83.94
> 43.36	96	79,65% to 99,9%	72.07	67,97% to 75,92%	84.035
> 43.58	96	79,65% to 99,9%	72.27	68,17% to 76,1%	84.135
> 43.77	96	79,65% to 99,9%	72.46	68,37% to 76,29%	84.23
> 43.99	96	79,65% to 99,9%	72.66	68,57% to 76,47%	84.33
> 44.36	96	79,65% to 99,9%	72.85	68,78% to 76,66%	84.425
> 44.76	96	79,65% to 99,9%	73.05	68,98% to 76,85%	84.525
> 45.05	96	79,65% to 99,9%	73.24	69,18% to 77,03%	84.62
> 45.39	96	79,65% to 99,9%	73.44	69,39% to 77,22%	84.72
> 45.84	96	79,65% to 99,9%	73.63	69,59% to 77,4%	84.815
> 46.23	96	79,65% to 99,9%	74.02	70% to 77,77%	85.01
> 46.46	96	79,65% to 99,9%	74.22	70,2% to 77,96%	85.11
> 46.6	96	79,65% to 99,9%	74.61	70,61% to 78,33%	85.305
> 46.87	96	79,65% to 99,9%	74.8	70,81% to 78,51%	85.4
> 47.76	96	79,65% to 99,9%	75	71,01% to 78,69%	85.5
> 48.41	96	79,65% to 99,9%	75.2	71,22% to 78,88%	85.6
> 48.46	96	79,65% to 99,9%	75.39	71,42% to 79,06%	85.695
> 48.62	96	79,65% to 99,9%	75.59	71,63% to 79,25%	85.795
> 48.85	96	79,65% to 99,9%	75.78	71,83% to 79,43%	85.89
> 49.03	96	79,65% to 99,9%	75.98	72,03% to 79,62%	85.99
> 49.13	96	79,65% to 99,9%	76.17	72,24% to 79,8%	86.085
> 49.29	96	79,65% to 99,9%	76.37	72,44% to 79,98%	86.185
> 49.6	96	79,65% to 99,9%	76.56	72,65% to 80,17%	86.28
> 49.94	96	79,65% to 99,9%	76.76	72,85% to 80,35%	86.38
> 50.49	96	79,65% to 99,9%	76.95	73,06% to 80,53%	86.475
> 50.9	96	79,65% to 99,9%	77.15	73,26% to 80,72%	86.575
> 50.92	96	79,65% to 99,9%	77.34	73,47% to 80,9%	86.67
> 50.97	96	79,65% to 99,9%	77.54	73,67% to 81,08%	86.77
> 51.14	96	79,65% to 99,9%	77.73	73,88% to 81,27%	86.865
> 51.36	96	79,65% to 99,9%	77.93	74,08% to 81,45%	86.965
> 51.5	96	79,65% to 99,9%	78.13	74,29% to 81,63%	87.065
> 51.56	96	79,65% to 99,9%	78.32	74,49% to 81,82%	87.16
> 51.71	96	79,65% to 99,9%	78.52	74,7% to 82%	87.26
> 52.05	96	79,65% to 99,9%	78.71	74,91% to 82,18%	87.355
> 52.34	96	79,65% to 99,9%	78.91	75,11% to 82,36%	87.455
> 52.71	96	79,65% to 99,9%	79.1	75,32% to 82,54%	87.55
> 53.28	96	79,65% to 99,9%	79.3	75,52% to 82,73%	87.65
> 53.98	96	79,65% to 99,9%	79.49	75,73% to 82,91%	87.745
> 55.01	96	79,65% to 99,9%	79.69	75,94% to 83,09%	87.845
> 55.99	96	79,65% to 99,9%	79.88	76,14% to 83,27%	87.94
> 56.65	96	79,65% to 99,9%	80.08	76,35% to 83,45%	88.04
> 57.17	96	79,65% to 99,9%	80.27	76,56% to 83,63%	88.135
> 57.38	96	79,65% to 99,9%	80.47	76,77% to 83,82%	88.235
> 57.62	92	73,97% to 99,02%	80.47	76,77% to 83,82%	86.235
> 57.88	92	73,97% to 99,02%	80.66	76,97% to 84%	86.33
> 58	92	73,97% to 99,02%	80.86	77,18% to 84,18%	86.43
> 58.62	92	73,97% to 99,02%	81.05	77,39% to 84,36%	86.525
> 59.27	92	73,97% to 99,02%	81.25	77,59% to 84,54%	86.625
> 59.47	92	73,97% to 99,02%	81.45	77,8% to 84,72%	86.725
> 59.73	92	73,97% to 99,02%	81.64	78,01% to 84,9%	86.82
> 60.46	92	73,97% to 99,02%	81.84	78,22% to 85,08%	86.92
> 61.06	92	73,97% to 99,02%	82.03	78,43% to 85,26%	87.015
> 61.3	92	73,97% to 99,02%	82.23	78,63% to 85,44%	87.115
> 62.02	92	73,97% to 99,02%	82.42	78,84% to 85,62%	87.21
> 62.56	92	73,97% to 99,02%	82.62	79,05% to 85,8%	87.31
> 63.71	92	73,97% to 99,02%	82.81	79,26% to 85,98%	87.405
> 64.98	92	73,97% to 99,02%	83.01	79,47% to 86,16%	87.505
> 65.13	92	73,97% to 99,02%	83.2	79,68% to 86,34%	87.6
> 65.19	92	73,97% to 99,02%	83.4	79,89% to 86,52%	87.7
> 65.32	92	73,97% to 99,02%	83.59	80,1% to 86,7%	87.795
> 65.51	92	73,97% to 99,02%	83.79	80,31% to 86,88%	87.895
> 65.83	92	73,97% to 99,02%	83.98	80,52% to 87,05%	87.99
> 66.36	92	73,97% to 99,02%	84.18	80,73% to 87,23%	88.09
> 66.78	92	73,97% to 99,02%	84.38	80,94% to 87,41%	88.19
> 66.92	92	73,97% to 99,02%	84.57	81,15% to 87,59%	88.285
> 67.27	92	73,97% to 99,02%	84.77	81,36% to 87,77%	88.385
> 67.73	92	73,97% to 99,02%	84.96	81,57% to 87,95%	88.48
> 68.06	92	73,97% to 99,02%	85.16	81,78% to 88,12%	88.58
> 68.38	92	73,97% to 99,02%	85.35	81,99% to 88,3%	88.675
> 68.81	92	73,97% to 99,02%	85.55	82,2% to 88,48%	88.775
> 69.46	92	73,97% to 99,02%	85.74	82,41% to 88,65%	88.87
> 70.46	92	73,97% to 99,02%	85.94	82,62% to 88,83%	88.97
> 71.32	92	73,97% to 99,02%	86.13	82,83% to 89,01%	89.065
> 71.57	92	73,97% to 99,02%	86.33	83,04% to 89,18%	89.165
> 71.86	92	73,97% to 99,02%	86.52	83,26% to 89,36%	89.26
> 72.24	92	73,97% to 99,02%	86.72	83,47% to 89,54%	89.36
> 73.16	92	73,97% to 99,02%	86.91	83,68% to 89,71%	89.455
> 74.26	92	73,97% to 99,02%	87.11	83,89% to 89,89%	89.555
> 74.77	92	73,97% to 99,02%	87.3	84,11% to 90,06%	89.65
> 75.98	92	73,97% to 99,02%	87.5	84,32% to 90,24%	89.75
> 77.49	92	73,97% to 99,02%	87.7	84,53% to 90,41%	89.85
> 78.38	92	73,97% to 99,02%	87.89	84,75% to 90,59%	89.945
> 79.02	92	73,97% to 99,02%	88.09	84,96% to 90,76%	90.045
> 79.34	88	68,78% to 97,45%	88.09	84,96% to 90,76%	88.045
> 79.51	88	68,78% to 97,45%	88.28	85,17% to 90,94%	88.14
> 79.64	88	68,78% to 97,45%	88.48	85,39% to 91,11%	88.24
> 79.92	88	68,78% to 97,45%	88.67	85,6% to 91,28%	88.335
> 80.3	88	68,78% to 97,45%	88.87	85,82% to 91,46%	88.435
> 81.35	88	68,78% to 97,45%	89.06	86,03% to 91,63%	88.53
> 82.55	88	68,78% to 97,45%	89.26	86,25% to 91,8%	88.63
> 83.83	84	63,92% to 95,46%	89.26	86,25% to 91,8%	86.63
> 86.28	84	63,92% to 95,46%	89.45	86,46% to 91,98%	86.725
> 87.91	84	63,92% to 95,46%	89.65	86,68% to 92,15%	86.825
> 88.15	84	63,92% to 95,46%	89.84	86,9% to 92,32%	86.92
> 89.27	84	63,92% to 95,46%	90.04	87,11% to 92,49%	87.02
> 90.54	84	63,92% to 95,46%	90.23	87,33% to 92,66%	87.115
> 90.76	84	63,92% to 95,46%	90.43	87,55% to 92,84%	87.215
> 91.22	84	63,92% to 95,46%	90.63	87,76% to 93,01%	87.315
> 91.89	84	63,92% to 95,46%	90.82	87,98% to 93,18%	87.41
> 92.29	84	63,92% to 95,46%	91.02	88,2% to 93,35%	87.51
> 92.48	84	63,92% to 95,46%	91.21	88,42% to 93,52%	87.605
> 92.57	84	63,92% to 95,46%	91.41	88,63% to 93,69%	87.705
> 92.77	80	59,3% to 93,17%	91.41	88,63% to 93,69%	85.705
> 93.32	80	59,3% to 93,17%	91.6	88,85% to 93,86%	85.8
> 93.74	76	54,87% to 90,64%	91.6	88,85% to 93,86%	83.8
> 93.78	76	54,87% to 90,64%	91.8	89,07% to 94,02%	83.9
> 94.29	76	54,87% to 90,64%	91.99	89,29% to 94,19%	83.995
> 95.1	76	54,87% to 90,64%	92.19	89,51% to 94,36%	84.095
> 95.95	76	54,87% to 90,64%	92.38	89,73% to 94,53%	84.19
> 96.58	72	50,61% to 87,93%	92.38	89,73% to 94,53%	82.19
> 97.07	72	50,61% to 87,93%	92.58	89,95% to 94,69%	82.29
> 98.03	72	50,61% to 87,93%	92.77	90,18% to 94,86%	82.385
> 99.06	72	50,61% to 87,93%	92.97	90,4% to 95,03%	82.485
> 99.96	72	50,61% to 87,93%	93.16	90,62% to 95,19%	82.58
> 100.5	72	50,61% to 87,93%	93.36	90,84% to 95,36%	82.68
> 100.6	72	50,61% to 87,93%	93.55	91,07% to 95,52%	82.775
> 101	72	50,61% to 87,93%	93.95	91,52% to 95,85%	82.975
> 101.3	68	46,5% to 85,05%	93.95	91,52% to 95,85%	80.975
> 101.6	68	46,5% to 85,05%	94.14	91,74% to 96,01%	81.07
> 102.5	64	42,52% to 82,03%	94.34	91,97% to 96,17%	79.17
> 103.5	64	42,52% to 82,03%	94.53	92,19% to 96,34%	79.265
> 104.2	56	34,93% to 75,6%	94.53	92,19% to 96,34%	75.265
> 105	56	34,93% to 75,6%	94.73	92,42% to 96,5%	75.365
> 105.4	56	34,93% to 75,6%	94.92	92,65% to 96,66%	75.46
> 106.2	56	34,93% to 75,6%	95.12	92,88% to 96,82%	75.56
> 107.2	56	34,93% to 75,6%	95.31	93,11% to 96,97%	75.655
> 107.6	52	31,31% to 72,2%	95.7	93,57% to 97,29%	73.85
> 108	52	31,31% to 72,2%	95.9	93,8% to 97,44%	73.95
> 108.6	52	31,31% to 72,2%	96.09	94,03% to 97,6%	74.045
> 109.2	48	27,8% to 68,69%	96.09	94,03% to 97,6%	72.045
> 110.3	48	27,8% to 68,69%	96.29	94,27% to 97,75%	72.145
> 112.2	48	27,8% to 68,69%	96.48	94,5% to 97,9%	72.24
> 113.3	48	27,8% to 68,69%	96.68	94,74% to 98,05%	72.34
> 113.6	48	27,8% to 68,69%	96.88	94,97% to 98,2%	72.44
> 115.4	44	24,4% to 65,07%	96.88	94,97% to 98,2%	70.44
> 117.3	40	21,13% to 61,33%	96.88	94,97% to 98,2%	68.44
> 118.5	40	21,13% to 61,33%	97.07	95,21% to 98,35%	68.535
> 119.8	40	21,13% to 61,33%	97.27	95,45% to 98,5%	68.635
> 120.3	36	17,97% to 57,48%	97.27	95,45% to 98,5%	66.635
> 121.1	36	17,97% to 57,48%	97.46	95,7% to 98,64%	66.73
> 122.1	36	17,97% to 57,48%	97.66	95,94% to 98,78%	66.83
> 122.4	32	14,95% to 53,5%	97.66	95,94% to 98,78%	64.83
> 124.5	32	14,95% to 53,5%	97.85	96,19% to 98,92%	64.925
> 126.5	32	14,95% to 53,5%	98.05	96,44% to 99,06%	65.025
> 127.9	28	12,07% to 49,39%	98.05	96,44% to 99,06%	63.025
> 129.4	28	12,07% to 49,39%	98.24	96,69% to 99,19%	63.12
> 131	28	12,07% to 49,39%	98.44	96,94% to 99,32%	63.22
> 133.3	24	9,356% to 45,13%	98.44	96,94% to 99,32%	61.22
> 134.2	20	6,831% to 40,7%	98.44	96,94% to 99,32%	59.22
> 134.4	20	6,831% to 40,7%	98.63	97,2% to 99,45%	59.315
> 134.9	20	6,831% to 40,7%	98.83	97,47% to 99,57%	59.415
> 135.5	20	6,831% to 40,7%	99.02	97,74% to 99,68%	59.51
> 135.9	16	4,538% to 36,08%	99.02	97,74% to 99,68%	57.51
> 136.6	12	2,547% to 31,22%	99.02	97,74% to 99,68%	55.51
> 138	8	0,984% to 26,03%	99.02	97,74% to 99,68%	53.51
> 139	4	0,1012% to 20,35%	99.02	97,74% to 99,68%	51.51
> 140	0	0% to 13,72%	99.02	97,74% to 99,68%	49.51
> 143	0	0% to 13,72%	99.22	98,01% to 99,79%	49.61
> 146.3	0	0% to 13,72%	99.41	98,3% to 99,88%	49.705
> 153.5	0	0% to 13,72%	99.61	98,6% to 99,95%	49.805
> 165.9	0	0% to 13,72%	99.8	98,92% to 100%	49.9

## Sheet: DGP (TG2+) IgG
Cut off	Sensitivity%	95% CI	Specificity%	95% CI	Accuracy%
> 0.005	100	86,28% to 100%	0.1953	0,004945% to 1,083%	50.0977
> 0.015	100	86,28% to 100%	0.3906	0,04734% to 1,404%	50.1953
> 0.03	100	86,28% to 100%	0.7813	0,2133% to 1,988%	50.3907
> 0.045	100	86,28% to 100%	0.9766	0,3178% to 2,264%	50.4883
> 0.06	100	86,28% to 100%	1.367	0,5514% to 2,797%	50.6835
> 0.075	100	86,28% to 100%	1.758	0,8069% to 3,311%	50.879
> 0.085	100	86,28% to 100%	2.344	1,217% to 4,058%	51.172
> 0.095	100	86,28% to 100%	2.539	1,359% to 4,303%	51.2695
> 0.105	100	86,28% to 100%	2.734	1,503% to 4,545%	51.367
> 0.115	100	86,28% to 100%	2.93	1,649% to 4,786%	51.465
> 0.125	100	86,28% to 100%	3.125	1,797% to 5,025%	51.5625
> 0.14	100	86,28% to 100%	3.32	1,946% to 5,263%	51.66
> 0.16	100	86,28% to 100%	3.516	2,097% to 5,499%	51.758
> 0.18	100	86,28% to 100%	3.711	2,249% to 5,735%	51.8555
> 0.2	100	86,28% to 100%	3.906	2,402% to 5,969%	51.953
> 0.215	100	86,28% to 100%	4.102	2,557% to 6,202%	52.051
> 0.235	100	86,28% to 100%	4.297	2,712% to 6,433%	52.1485
> 0.255	100	86,28% to 100%	4.492	2,869% to 6,664%	52.246
> 0.265	100	86,28% to 100%	4.883	3,184% to 7,124%	52.4415
> 0.28	100	86,28% to 100%	5.273	3,504% to 7,58%	52.6365
> 0.3	100	86,28% to 100%	5.664	3,826% to 8,034%	52.832
> 0.32	100	86,28% to 100%	5.859	3,988% to 8,259%	52.9295
> 0.35	100	86,28% to 100%	6.055	4,151% to 8,484%	53.0275
> 0.39	100	86,28% to 100%	6.25	4,314% to 8,709%	53.125
> 0.42	100	86,28% to 100%	6.445	4,478% to 8,933%	53.2225
> 0.435	100	86,28% to 100%	6.641	4,642% to 9,156%	53.3205
> 0.445	100	86,28% to 100%	6.836	4,807% to 9,379%	53.418
> 0.455	100	86,28% to 100%	7.227	5,139% to 9,824%	53.6135
> 0.485	100	86,28% to 100%	7.422	5,305% to 10,05%	53.711
> 0.515	100	86,28% to 100%	7.617	5,472% to 10,27%	53.8085
> 0.54	100	86,28% to 100%	7.813	5,64% to 10,49%	53.9065
> 0.58	100	86,28% to 100%	8.203	5,976% to 10,93%	54.1015
> 0.605	100	86,28% to 100%	8.398	6,145% to 11,15%	54.199
> 0.63	100	86,28% to 100%	8.594	6,314% to 11,37%	54.297
> 0.66	100	86,28% to 100%	8.789	6,483% to 11,58%	54.3945
> 0.68	100	86,28% to 100%	9.18	6,823% to 12,02%	54.59
> 0.695	100	86,28% to 100%	9.375	6,993% to 12,24%	54.6875
> 0.71	100	86,28% to 100%	9.57	7,164% to 12,45%	54.785
> 0.735	100	86,28% to 100%	9.766	7,335% to 12,67%	54.883
> 0.76	100	86,28% to 100%	9.961	7,507% to 12,89%	54.9805
> 0.775	100	86,28% to 100%	10.16	7,679% to 13,1%	55.08
> 0.795	100	86,28% to 100%	10.35	7,851% to 13,32%	55.175
> 0.82	100	86,28% to 100%	10.55	8,023% to 13,54%	55.275
> 0.835	100	86,28% to 100%	10.74	8,196% to 13,75%	55.37
> 0.855	100	86,28% to 100%	10.94	8,368% to 13,97%	55.47
> 0.875	100	86,28% to 100%	11.13	8,542% to 14,18%	55.565
> 0.885	100	86,28% to 100%	11.52	8,889% to 14,61%	55.76
> 0.9	100	86,28% to 100%	11.72	9,063% to 14,83%	55.86
> 0.915	100	86,28% to 100%	11.91	9,237% to 15,04%	55.955
> 0.945	100	86,28% to 100%	12.11	9,411% to 15,25%	56.055
> 0.975	100	86,28% to 100%	12.5	9,761% to 15,68%	56.25
> 0.985	100	86,28% to 100%	12.7	9,936% to 15,89%	56.35
> 1.005	100	86,28% to 100%	12.89	10,11% to 16,11%	56.445
> 1.025	100	86,28% to 100%	13.09	10,29% to 16,32%	56.545
> 1.035	100	86,28% to 100%	13.67	10,82% to 16,96%	56.835
> 1.045	100	86,28% to 100%	13.87	10,99% to 17,17%	56.935
> 1.075	100	86,28% to 100%	14.06	11,17% to 17,38%	57.03
> 1.105	100	86,28% to 100%	14.26	11,35% to 17,59%	57.13
> 1.115	100	86,28% to 100%	14.45	11,52% to 17,8%	57.225
> 1.135	100	86,28% to 100%	14.65	11,7% to 18,01%	57.325
> 1.21	100	86,28% to 100%	14.84	11,88% to 18,22%	57.42
> 1.29	100	86,28% to 100%	15.04	12,05% to 18,43%	57.52
> 1.335	100	86,28% to 100%	15.23	12,23% to 18,64%	57.615
> 1.38	100	86,28% to 100%	15.43	12,41% to 18,85%	57.715
> 1.405	100	86,28% to 100%	15.63	12,59% to 19,06%	57.815
> 1.415	100	86,28% to 100%	15.82	12,77% to 19,27%	57.91
> 1.43	100	86,28% to 100%	16.02	12,95% to 19,48%	58.01
> 1.445	100	86,28% to 100%	16.21	13,12% to 19,69%	58.105
> 1.47	100	86,28% to 100%	16.41	13,3% to 19,9%	58.205
> 1.505	100	86,28% to 100%	16.6	13,48% to 20,11%	58.3
> 1.55	100	86,28% to 100%	16.99	13,84% to 20,53%	58.495
> 1.585	100	86,28% to 100%	17.38	14,2% to 20,95%	58.69
> 1.595	100	86,28% to 100%	17.77	14,56% to 21,37%	58.885
> 1.635	100	86,28% to 100%	17.97	14,74% to 21,57%	58.985
> 1.675	100	86,28% to 100%	18.16	14,92% to 21,78%	59.08
> 1.715	100	86,28% to 100%	18.36	15,1% to 21,99%	59.18
> 1.765	100	86,28% to 100%	18.55	15,28% to 22,2%	59.275
> 1.82	100	86,28% to 100%	18.95	15,64% to 22,61%	59.475
> 1.88	100	86,28% to 100%	19.14	15,82% to 22,82%	59.57
> 1.915	100	86,28% to 100%	19.34	16% to 23,03%	59.67
> 1.945	100	86,28% to 100%	19.53	16,18% to 23,23%	59.765
> 1.985	100	86,28% to 100%	19.73	16,37% to 23,44%	59.865
> 2.03	100	86,28% to 100%	19.92	16,55% to 23,65%	59.96
> 2.065	100	86,28% to 100%	20.31	16,91% to 24,06%	60.155
> 2.085	100	86,28% to 100%	20.51	17,09% to 24,27%	60.255
> 2.095	100	86,28% to 100%	20.9	17,46% to 24,68%	60.45
> 2.12	100	86,28% to 100%	21.09	17,64% to 24,89%	60.545
> 2.18	100	86,28% to 100%	21.29	17,82% to 25,09%	60.645
> 2.235	100	86,28% to 100%	21.68	18,18% to 25,51%	60.84
> 2.26	100	86,28% to 100%	21.88	18,37% to 25,71%	60.94
> 2.285	100	86,28% to 100%	22.07	18,55% to 25,92%	61.035
> 2.305	100	86,28% to 100%	22.27	18,73% to 26,12%	61.135
> 2.375	100	86,28% to 100%	22.46	18,92% to 26,33%	61.23
> 2.45	100	86,28% to 100%	22.66	19,1% to 26,53%	61.33
> 2.47	100	86,28% to 100%	22.85	19,28% to 26,74%	61.425
> 2.5	100	86,28% to 100%	23.05	19,47% to 26,94%	61.525
> 2.54	100	86,28% to 100%	23.24	19,65% to 27,15%	61.62
> 2.565	100	86,28% to 100%	23.44	19,83% to 27,35%	61.72
> 2.585	100	86,28% to 100%	23.63	20,02% to 27,56%	61.815
> 2.615	100	86,28% to 100%	24.02	20,38% to 27,97%	62.01
> 2.64	100	86,28% to 100%	24.41	20,75% to 28,37%	62.205
> 2.67	100	86,28% to 100%	24.61	20,94% to 28,58%	62.305
> 2.705	100	86,28% to 100%	25	21,31% to 28,99%	62.5
> 2.725	100	86,28% to 100%	25.2	21,49% to 29,19%	62.6
> 2.74	100	86,28% to 100%	25.39	21,67% to 29,39%	62.695
> 2.76	100	86,28% to 100%	25.59	21,86% to 29,6%	62.795
> 2.85	100	86,28% to 100%	25.78	22,04% to 29,8%	62.89
> 2.99	100	86,28% to 100%	25.98	22,23% to 30%	62.99
> 3.06	100	86,28% to 100%	26.17	22,41% to 30,21%	63.085
> 3.105	100	86,28% to 100%	26.37	22,6% to 30,41%	63.185
> 3.15	100	86,28% to 100%	26.76	22,97% to 30,82%	63.38
> 3.165	100	86,28% to 100%	26.95	23,15% to 31,02%	63.475
> 3.175	100	86,28% to 100%	27.15	23,34% to 31,22%	63.575
> 3.245	100	86,28% to 100%	27.34	23,53% to 31,43%	63.67
> 3.335	100	86,28% to 100%	27.54	23,71% to 31,63%	63.77
> 3.365	100	86,28% to 100%	27.93	24,08% to 32,03%	63.965
> 3.375	100	86,28% to 100%	28.13	24,27% to 32,24%	64.065
> 3.39	100	86,28% to 100%	28.32	24,45% to 32,44%	64.16
> 3.405	100	86,28% to 100%	28.52	24,64% to 32,64%	64.26
> 3.44	100	86,28% to 100%	28.71	24,83% to 32,84%	64.355
> 3.48	100	86,28% to 100%	28.91	25,01% to 33,04%	64.455
> 3.505	100	86,28% to 100%	29.1	25,2% to 33,25%	64.55
> 3.55	100	86,28% to 100%	29.3	25,39% to 33,45%	64.65
> 3.65	100	86,28% to 100%	29.49	25,57% to 33,65%	64.745
> 3.73	100	86,28% to 100%	29.69	25,76% to 33,85%	64.845
> 3.75	100	86,28% to 100%	29.88	25,95% to 34,05%	64.94
> 3.84	100	86,28% to 100%	30.08	26,13% to 34,26%	65.04
> 3.94	100	86,28% to 100%	30.47	26,51% to 34,66%	65.235
> 3.995	100	86,28% to 100%	30.66	26,69% to 34,86%	65.33
> 4.04	100	86,28% to 100%	30.86	26,88% to 35,06%	65.43
> 4.06	100	86,28% to 100%	31.05	27,07% to 35,26%	65.525
> 4.085	100	86,28% to 100%	31.25	27,26% to 35,46%	65.625
> 4.11	100	86,28% to 100%	31.45	27,44% to 35,66%	65.725
> 4.125	100	86,28% to 100%	31.64	27,63% to 35,86%	65.82
> 4.16	100	86,28% to 100%	31.84	27,82% to 36,06%	65.92
> 4.27	100	86,28% to 100%	32.03	28,01% to 36,27%	66.015
> 4.36	100	86,28% to 100%	32.23	28,19% to 36,47%	66.115
> 4.43	100	86,28% to 100%	32.42	28,38% to 36,67%	66.21
> 4.57	100	86,28% to 100%	32.81	28,76% to 37,07%	66.405
> 4.66	100	86,28% to 100%	33.01	28,95% to 37,27%	66.505
> 4.78	100	86,28% to 100%	33.4	29,32% to 37,67%	66.7
> 4.98	100	86,28% to 100%	33.79	29,7% to 38,07%	66.895
> 5.11	100	86,28% to 100%	33.98	29,89% to 38,27%	66.99
> 5.155	100	86,28% to 100%	34.18	30,08% to 38,47%	67.09
> 5.175	100	86,28% to 100%	34.38	30,26% to 38,67%	67.19
> 5.21	100	86,28% to 100%	34.77	30,64% to 39,07%	67.385
> 5.345	100	86,28% to 100%	34.96	30,83% to 39,27%	67.48
> 5.485	100	86,28% to 100%	35.16	31,02% to 39,47%	67.58
> 5.525	100	86,28% to 100%	35.35	31,21% to 39,67%	67.675
> 5.555	100	86,28% to 100%	35.74	31,59% to 40,06%	67.87
> 5.59	100	86,28% to 100%	35.94	31,78% to 40,26%	67.97
> 5.62	100	86,28% to 100%	36.13	31,96% to 40,46%	68.065
> 5.635	100	86,28% to 100%	36.33	32,15% to 40,66%	68.165
> 5.685	100	86,28% to 100%	36.52	32,34% to 40,86%	68.26
> 5.795	100	86,28% to 100%	36.72	32,53% to 41,06%	68.36
> 5.87	100	86,28% to 100%	36.91	32,72% to 41,26%	68.455
> 5.905	100	86,28% to 100%	37.11	32,91% to 41,46%	68.555
> 5.94	100	86,28% to 100%	37.3	33,1% to 41,66%	68.65
> 5.975	100	86,28% to 100%	37.5	33,29% to 41,85%	68.75
> 6.005	100	86,28% to 100%	37.7	33,48% to 42,05%	68.85
> 6.035	100	86,28% to 100%	37.89	33,67% to 42,25%	68.945
> 6.08	100	86,28% to 100%	38.09	33,86% to 42,45%	69.045
> 6.105	100	86,28% to 100%	38.28	34,05% to 42,65%	69.14
> 6.115	100	86,28% to 100%	38.48	34,24% to 42,85%	69.24
> 6.13	100	86,28% to 100%	38.67	34,43% to 43,04%	69.335
> 6.21	100	86,28% to 100%	39.06	34,81% to 43,44%	69.53
> 6.35	100	86,28% to 100%	39.26	35% to 43,64%	69.63
> 6.445	100	86,28% to 100%	39.45	35,19% to 43,84%	69.725
> 6.49	100	86,28% to 100%	39.65	35,38% to 44,03%	69.825
> 6.57	100	86,28% to 100%	39.84	35,57% to 44,23%	69.92
> 6.64	100	86,28% to 100%	40.04	35,77% to 44,43%	70.02
> 6.655	100	86,28% to 100%	40.43	36,15% to 44,82%	70.215
> 6.665	100	86,28% to 100%	40.63	36,34% to 45,02%	70.315
> 6.69	100	86,28% to 100%	40.82	36,53% to 45,22%	70.41
> 6.72	100	86,28% to 100%	41.02	36,72% to 45,42%	70.51
> 6.77	100	86,28% to 100%	41.21	36,91% to 45,61%	70.605
> 6.85	100	86,28% to 100%	41.8	37,49% to 46,2%	70.9
> 6.905	100	86,28% to 100%	41.99	37,68% to 46,4%	70.995
> 6.93	100	86,28% to 100%	42.19	37,87% to 46,6%	71.095
> 6.95	100	86,28% to 100%	42.38	38,06% to 46,79%	71.19
> 6.97	100	86,28% to 100%	42.58	38,25% to 46,99%	71.29
> 7.025	100	86,28% to 100%	42.77	38,44% to 47,19%	71.385
> 7.075	100	86,28% to 100%	42.97	38,63% to 47,38%	71.485
> 7.09	100	86,28% to 100%	43.16	38,83% to 47,58%	71.58
> 7.115	100	86,28% to 100%	43.36	39,02% to 47,78%	71.68
> 7.135	100	86,28% to 100%	43.55	39,21% to 47,97%	71.775
> 7.145	100	86,28% to 100%	43.75	39,4% to 48,17%	71.875
> 7.17	100	86,28% to 100%	43.95	39,59% to 48,37%	71.975
> 7.2	100	86,28% to 100%	44.14	39,79% to 48,56%	72.07
> 7.215	100	86,28% to 100%	44.34	39,98% to 48,76%	72.17
> 7.25	100	86,28% to 100%	44.53	40,17% to 48,95%	72.265
> 7.29	100	86,28% to 100%	44.73	40,36% to 49,15%	72.365
> 7.32	100	86,28% to 100%	44.92	40,56% to 49,35%	72.46
> 7.35	100	86,28% to 100%	45.31	40,94% to 49,74%	72.655
> 7.44	100	86,28% to 100%	45.51	41,13% to 49,93%	72.755
> 7.525	100	86,28% to 100%	45.7	41,33% to 50,13%	72.85
> 7.54	100	86,28% to 100%	45.9	41,52% to 50,33%	72.95
> 7.565	100	86,28% to 100%	46.09	41,71% to 50,52%	73.045
> 7.605	100	86,28% to 100%	46.29	41,9% to 50,72%	73.145
> 7.635	100	86,28% to 100%	46.48	42,1% to 50,91%	73.24
> 7.73	100	86,28% to 100%	46.68	42,29% to 51,11%	73.34
> 7.83	100	86,28% to 100%	47.27	42,87% to 51,69%	73.635
> 7.86	100	86,28% to 100%	47.46	43,06% to 51,89%	73.73
> 7.99	100	86,28% to 100%	47.66	43,26% to 52,08%	73.83
> 8.12	100	86,28% to 100%	47.85	43,45% to 52,28%	73.925
> 8.165	100	86,28% to 100%	48.05	43,64% to 52,47%	74.025
> 8.205	100	86,28% to 100%	48.24	43,84% to 52,67%	74.12
> 8.255	100	86,28% to 100%	48.44	44,03% to 52,86%	74.22
> 8.32	100	86,28% to 100%	48.83	44,42% to 53,25%	74.415
> 8.355	100	86,28% to 100%	49.02	44,61% to 53,45%	74.51
> 8.4	100	86,28% to 100%	49.22	44,81% to 53,64%	74.61
> 8.49	100	86,28% to 100%	49.41	45% to 53,83%	74.705
> 8.555	100	86,28% to 100%	49.61	45,19% to 54,03%	74.805
> 8.635	100	86,28% to 100%	49.8	45,39% to 54,22%	74.9
> 8.71	100	86,28% to 100%	50	45,58% to 54,42%	75
> 8.77	100	86,28% to 100%	50.2	45,78% to 54,61%	75.1
> 8.825	100	86,28% to 100%	50.39	45,97% to 54,81%	75.195
> 8.91	100	86,28% to 100%	50.59	46,17% to 55%	75.295
> 9.01	100	86,28% to 100%	50.78	46,36% to 55,19%	75.39
> 9.04	100	86,28% to 100%	50.98	46,55% to 55,39%	75.49
> 9.06	100	86,28% to 100%	51.17	46,75% to 55,58%	75.585
> 9.1	100	86,28% to 100%	51.37	46,94% to 55,78%	75.685
> 9.155	100	86,28% to 100%	51.56	47,14% to 55,97%	75.78
> 9.205	100	86,28% to 100%	51.76	47,33% to 56,16%	75.88
> 9.24	100	86,28% to 100%	51.95	47,53% to 56,36%	75.975
> 9.3	100	86,28% to 100%	52.15	47,72% to 56,55%	76.075
> 9.355	100	86,28% to 100%	52.54	48,11% to 56,94%	76.27
> 9.39	100	86,28% to 100%	52.73	48,31% to 57,13%	76.365
> 9.43	100	86,28% to 100%	52.93	48,5% to 57,32%	76.465
> 9.47	100	86,28% to 100%	53.13	48,7% to 57,52%	76.565
> 9.505	100	86,28% to 100%	53.32	48,89% to 57,71%	76.66
> 9.545	100	86,28% to 100%	53.71	49,28% to 58,1%	76.855
> 9.59	100	86,28% to 100%	53.91	49,48% to 58,29%	76.955
> 9.61	100	86,28% to 100%	54.1	49,67% to 58,48%	77.05
> 9.645	100	86,28% to 100%	54.3	49,87% to 58,67%	77.15
> 9.725	100	86,28% to 100%	54.49	50,07% to 58,87%	77.245
> 9.82	100	86,28% to 100%	54.69	50,26% to 59,06%	77.345
> 9.875	100	86,28% to 100%	54.88	50,46% to 59,25%	77.44
> 9.925	100	86,28% to 100%	55.08	50,65% to 59,44%	77.54
> 9.965	100	86,28% to 100%	55.27	50,85% to 59,64%	77.635
> 9.985	100	86,28% to 100%	55.47	51,05% to 59,83%	77.735
> 10.01	100	86,28% to 100%	55.86	51,44% to 60,21%	77.93
> 10.06	100	86,28% to 100%	56.05	51,63% to 60,41%	78.025
> 10.22	100	86,28% to 100%	56.25	51,83% to 60,6%	78.125
> 10.35	100	86,28% to 100%	56.45	52,03% to 60,79%	78.225
> 10.4	100	86,28% to 100%	56.64	52,22% to 60,98%	78.32
> 10.44	100	86,28% to 100%	56.84	52,42% to 61,17%	78.42
> 10.47	100	86,28% to 100%	57.03	52,62% to 61,37%	78.515
> 10.61	100	86,28% to 100%	57.23	52,81% to 61,56%	78.615
> 10.77	100	86,28% to 100%	57.42	53,01% to 61,75%	78.71
> 10.83	100	86,28% to 100%	57.62	53,21% to 61,94%	78.81
> 10.89	100	86,28% to 100%	57.81	53,4% to 62,13%	78.905
> 10.95	100	86,28% to 100%	58.01	53,6% to 62,32%	79.005
> 11.05	100	86,28% to 100%	58.2	53,8% to 62,51%	79.1
> 11.15	100	86,28% to 100%	58.4	53,99% to 62,71%	79.2
> 11.23	100	86,28% to 100%	58.59	54,19% to 62,9%	79.295
> 11.37	100	86,28% to 100%	58.79	54,39% to 63,09%	79.395
> 11.6	100	86,28% to 100%	58.98	54,58% to 63,28%	79.49
> 11.89	100	86,28% to 100%	59.18	54,78% to 63,47%	79.59
> 12.05	100	86,28% to 100%	59.38	54,98% to 63,66%	79.69
> 12.09	100	86,28% to 100%	59.57	55,18% to 63,85%	79.785
> 12.16	100	86,28% to 100%	59.77	55,37% to 64,04%	79.885
> 12.27	100	86,28% to 100%	59.96	55,57% to 64,23%	79.98
> 12.36	100	86,28% to 100%	60.16	55,77% to 64,43%	80.08
> 12.46	100	86,28% to 100%	60.35	55,97% to 64,62%	80.175
> 12.55	100	86,28% to 100%	60.55	56,16% to 64,81%	80.275
> 12.61	100	86,28% to 100%	60.94	56,56% to 65,19%	80.47
> 12.71	100	86,28% to 100%	61.13	56,76% to 65,38%	80.565
> 12.86	100	86,28% to 100%	61.52	57,15% to 65,76%	80.76
> 12.99	100	86,28% to 100%	61.72	57,35% to 65,95%	80.86
> 13.04	100	86,28% to 100%	61.91	57,55% to 66,14%	80.955
> 13.07	100	86,28% to 100%	62.11	57,75% to 66,33%	81.055
> 13.1	100	86,28% to 100%	62.3	57,95% to 66,52%	81.15
> 13.15	100	86,28% to 100%	62.5	58,15% to 66,71%	81.25
> 13.26	100	86,28% to 100%	62.7	58,34% to 66,9%	81.35
> 13.37	100	86,28% to 100%	62.89	58,54% to 67,09%	81.445
> 13.46	100	86,28% to 100%	63.09	58,74% to 67,28%	81.545
> 13.55	100	86,28% to 100%	63.28	58,94% to 67,47%	81.64
> 13.62	100	86,28% to 100%	63.48	59,14% to 67,66%	81.74
> 13.68	100	86,28% to 100%	63.67	59,34% to 67,85%	81.835
> 13.74	100	86,28% to 100%	63.87	59,54% to 68,04%	81.935
> 13.77	100	86,28% to 100%	64.06	59,74% to 68,22%	82.03
> 13.83	100	86,28% to 100%	64.26	59,94% to 68,41%	82.13
> 13.96	100	86,28% to 100%	64.45	60,14% to 68,6%	82.225
> 14.06	100	86,28% to 100%	64.65	60,33% to 68,79%	82.325
> 14.08	100	86,28% to 100%	64.84	60,53% to 68,98%	82.42
> 14.14	100	86,28% to 100%	65.04	60,73% to 69,17%	82.52
> 14.26	100	86,28% to 100%	65.23	60,93% to 69,36%	82.615
> 14.41	100	86,28% to 100%	65.43	61,13% to 69,55%	82.715
> 14.55	100	86,28% to 100%	65.63	61,33% to 69,74%	82.815
> 14.69	100	86,28% to 100%	65.82	61,53% to 69,92%	82.91
> 14.78	100	86,28% to 100%	66.21	61,93% to 70,3%	83.105
> 14.88	100	86,28% to 100%	66.41	62,13% to 70,49%	83.205
> 15.16	100	86,28% to 100%	66.6	62,33% to 70,68%	83.3
> 15.41	100	86,28% to 100%	66.8	62,53% to 70,87%	83.4
> 15.55	100	86,28% to 100%	67.19	62,93% to 71,24%	83.595
> 15.7	100	86,28% to 100%	67.38	63,13% to 71,43%	83.69
> 15.86	100	86,28% to 100%	67.58	63,33% to 71,62%	83.79
> 16.08	100	86,28% to 100%	67.77	63,53% to 71,81%	83.885
> 16.21	100	86,28% to 100%	68.16	63,94% to 72,18%	84.08
> 16.25	100	86,28% to 100%	68.36	64,14% to 72,37%	84.18
> 16.28	100	86,28% to 100%	68.55	64,34% to 72,56%	84.275
> 16.3	100	86,28% to 100%	68.75	64,54% to 72,74%	84.375
> 16.33	100	86,28% to 100%	68.95	64,74% to 72,93%	84.475
> 16.42	100	86,28% to 100%	69.14	64,94% to 73,12%	84.57
> 16.5	100	86,28% to 100%	69.34	65,14% to 73,31%	84.67
> 16.55	100	86,28% to 100%	69.53	65,34% to 73,49%	84.765
> 16.59	100	86,28% to 100%	69.73	65,54% to 73,68%	84.865
> 16.65	100	86,28% to 100%	70.12	65,95% to 74,05%	85.06
> 16.76	100	86,28% to 100%	70.31	66,15% to 74,24%	85.155
> 16.95	100	86,28% to 100%	70.51	66,35% to 74,43%	85.255
> 17.17	100	86,28% to 100%	70.7	66,55% to 74,61%	85.35
> 17.31	100	86,28% to 100%	70.9	66,75% to 74,8%	85.45
> 17.45	100	86,28% to 100%	71.09	66,96% to 74,99%	85.545
> 17.57	100	86,28% to 100%	71.29	67,16% to 75,17%	85.645
> 17.75	100	86,28% to 100%	71.48	67,36% to 75,36%	85.74
> 18.02	100	86,28% to 100%	71.68	67,56% to 75,55%	85.84
> 18.14	100	86,28% to 100%	71.88	67,76% to 75,73%	85.94
> 18.2	100	86,28% to 100%	72.07	67,97% to 75,92%	86.035
> 18.26	100	86,28% to 100%	72.46	68,37% to 76,29%	86.23
> 18.34	100	86,28% to 100%	72.66	68,57% to 76,47%	86.33
> 18.42	100	86,28% to 100%	72.85	68,78% to 76,66%	86.425
> 18.47	100	86,28% to 100%	73.05	68,98% to 76,85%	86.525
> 18.53	100	86,28% to 100%	73.24	69,18% to 77,03%	86.62
> 18.7	100	86,28% to 100%	73.44	69,39% to 77,22%	86.72
> 18.85	100	86,28% to 100%	73.63	69,59% to 77,4%	86.815
> 18.88	100	86,28% to 100%	73.83	69,79% to 77,59%	86.915
> 18.91	100	86,28% to 100%	74.02	70% to 77,77%	87.01
> 18.98	100	86,28% to 100%	74.22	70,2% to 77,96%	87.11
> 19.07	100	86,28% to 100%	74.41	70,4% to 78,14%	87.205
> 19.18	100	86,28% to 100%	74.61	70,61% to 78,33%	87.305
> 19.36	100	86,28% to 100%	74.8	70,81% to 78,51%	87.4
> 19.5	100	86,28% to 100%	75	71,01% to 78,69%	87.5
> 19.71	100	86,28% to 100%	75.2	71,22% to 78,88%	87.6
> 19.92	100	86,28% to 100%	75.39	71,42% to 79,06%	87.695
> 19.99	100	86,28% to 100%	75.59	71,63% to 79,25%	87.795
> 20.08	100	86,28% to 100%	75.78	71,83% to 79,43%	87.89
> 20.13	100	86,28% to 100%	75.98	72,03% to 79,62%	87.99
> 20.22	100	86,28% to 100%	76.17	72,24% to 79,8%	88.085
> 20.38	100	86,28% to 100%	76.37	72,44% to 79,98%	88.185
> 20.62	100	86,28% to 100%	76.56	72,65% to 80,17%	88.28
> 20.84	100	86,28% to 100%	76.76	72,85% to 80,35%	88.38
> 20.91	100	86,28% to 100%	76.95	73,06% to 80,53%	88.475
> 20.98	100	86,28% to 100%	77.15	73,26% to 80,72%	88.575
> 21.06	100	86,28% to 100%	77.34	73,47% to 80,9%	88.67
> 21.19	100	86,28% to 100%	77.54	73,67% to 81,08%	88.77
> 21.29	100	86,28% to 100%	77.73	73,88% to 81,27%	88.865
> 21.32	100	86,28% to 100%	77.93	74,08% to 81,45%	88.965
> 21.78	100	86,28% to 100%	78.13	74,29% to 81,63%	89.065
> 22.27	100	86,28% to 100%	78.32	74,49% to 81,82%	89.16
> 22.37	100	86,28% to 100%	78.52	74,7% to 82%	89.26
> 22.55	100	86,28% to 100%	78.71	74,91% to 82,18%	89.355
> 22.73	100	86,28% to 100%	78.91	75,11% to 82,36%	89.455
> 22.79	100	86,28% to 100%	79.1	75,32% to 82,54%	89.55
> 23	100	86,28% to 100%	79.3	75,52% to 82,73%	89.65
> 23.27	100	86,28% to 100%	79.49	75,73% to 82,91%	89.745
> 23.36	100	86,28% to 100%	79.69	75,94% to 83,09%	89.845
> 23.49	100	86,28% to 100%	79.88	76,14% to 83,27%	89.94
> 23.59	100	86,28% to 100%	80.08	76,35% to 83,45%	90.04
> 23.74	100	86,28% to 100%	80.27	76,56% to 83,63%	90.135
> 23.93	100	86,28% to 100%	80.47	76,77% to 83,82%	90.235
> 24.01	100	86,28% to 100%	80.66	76,97% to 84%	90.33
> 24.11	100	86,28% to 100%	80.86	77,18% to 84,18%	90.43
> 24.25	100	86,28% to 100%	81.05	77,39% to 84,36%	90.525
> 24.41	100	86,28% to 100%	81.25	77,59% to 84,54%	90.625
> 24.51	100	86,28% to 100%	81.45	77,8% to 84,72%	90.725
> 24.59	100	86,28% to 100%	81.64	78,01% to 84,9%	90.82
> 24.68	100	86,28% to 100%	81.84	78,22% to 85,08%	90.92
> 24.71	100	86,28% to 100%	82.03	78,43% to 85,26%	91.015
> 24.74	100	86,28% to 100%	82.23	78,63% to 85,44%	91.115
> 24.84	100	86,28% to 100%	82.42	78,84% to 85,62%	91.21
> 25.02	100	86,28% to 100%	82.62	79,05% to 85,8%	91.31
> 25.15	100	86,28% to 100%	82.81	79,26% to 85,98%	91.405
> 25.18	100	86,28% to 100%	83.01	79,47% to 86,16%	91.505
> 25.24	100	86,28% to 100%	83.2	79,68% to 86,34%	91.6
> 25.34	100	86,28% to 100%	83.4	79,89% to 86,52%	91.7
> 25.48	100	86,28% to 100%	83.59	80,1% to 86,7%	91.795
> 25.62	100	86,28% to 100%	83.79	80,31% to 86,88%	91.895
> 26.1	100	86,28% to 100%	83.98	80,52% to 87,05%	91.99
> 26.62	100	86,28% to 100%	84.18	80,73% to 87,23%	92.09
> 26.76	100	86,28% to 100%	84.38	80,94% to 87,41%	92.19
> 27.06	100	86,28% to 100%	84.57	81,15% to 87,59%	92.285
> 27.7	100	86,28% to 100%	84.77	81,36% to 87,77%	92.385
> 28.23	100	86,28% to 100%	84.96	81,57% to 87,95%	92.48
> 28.48	100	86,28% to 100%	85.16	81,78% to 88,12%	92.58
> 28.65	100	86,28% to 100%	85.35	81,99% to 88,3%	92.675
> 28.75	100	86,28% to 100%	85.55	82,2% to 88,48%	92.775
> 28.82	100	86,28% to 100%	85.74	82,41% to 88,65%	92.87
> 29.04	100	86,28% to 100%	85.94	82,62% to 88,83%	92.97
> 29.66	100	86,28% to 100%	86.13	82,83% to 89,01%	93.065
> 30.87	100	86,28% to 100%	86.33	83,04% to 89,18%	93.165
> 31.65	100	86,28% to 100%	86.52	83,26% to 89,36%	93.26
> 31.77	100	86,28% to 100%	86.72	83,47% to 89,54%	93.36
> 32.1	100	86,28% to 100%	86.91	83,68% to 89,71%	93.455
> 32.51	100	86,28% to 100%	87.11	83,89% to 89,89%	93.555
> 33.26	100	86,28% to 100%	87.3	84,11% to 90,06%	93.65
> 34.14	100	86,28% to 100%	87.5	84,32% to 90,24%	93.75
> 34.49	100	86,28% to 100%	87.7	84,53% to 90,41%	93.85
> 34.67	100	86,28% to 100%	87.89	84,75% to 90,59%	93.945
> 35.08	100	86,28% to 100%	88.09	84,96% to 90,76%	94.045
> 35.39	100	86,28% to 100%	88.28	85,17% to 90,94%	94.14
> 35.65	100	86,28% to 100%	88.48	85,39% to 91,11%	94.24
> 35.91	100	86,28% to 100%	88.67	85,6% to 91,28%	94.335
> 36	100	86,28% to 100%	88.87	85,82% to 91,46%	94.435
> 36.52	100	86,28% to 100%	89.06	86,03% to 91,63%	94.53
> 37.27	100	86,28% to 100%	89.26	86,25% to 91,8%	94.63
> 37.79	100	86,28% to 100%	89.45	86,46% to 91,98%	94.725
> 38.08	100	86,28% to 100%	89.65	86,68% to 92,15%	94.825
> 38.79	100	86,28% to 100%	89.84	86,9% to 92,32%	94.92
> 39.64	100	86,28% to 100%	90.04	87,11% to 92,49%	95.02
> 40.28	100	86,28% to 100%	90.23	87,33% to 92,66%	95.115
> 40.75	96	79,65% to 99,9%	90.23	87,33% to 92,66%	93.115
> 41.07	96	79,65% to 99,9%	90.43	87,55% to 92,84%	93.215
> 41.43	96	79,65% to 99,9%	90.63	87,76% to 93,01%	93.315
> 41.52	96	79,65% to 99,9%	90.82	87,98% to 93,18%	93.41
> 41.87	96	79,65% to 99,9%	91.02	88,2% to 93,35%	93.51
> 42.39	96	79,65% to 99,9%	91.21	88,42% to 93,52%	93.605
> 42.6	96	79,65% to 99,9%	91.41	88,63% to 93,69%	93.705
> 43.16	96	79,65% to 99,9%	91.6	88,85% to 93,86%	93.8
> 43.74	96	79,65% to 99,9%	91.8	89,07% to 94,02%	93.9
> 43.89	96	79,65% to 99,9%	91.99	89,29% to 94,19%	93.995
> 44.14	96	79,65% to 99,9%	92.19	89,51% to 94,36%	94.095
> 44.68	96	79,65% to 99,9%	92.38	89,73% to 94,53%	94.19
> 45.36	96	79,65% to 99,9%	92.58	89,95% to 94,69%	94.29
> 45.98	96	79,65% to 99,9%	92.77	90,18% to 94,86%	94.385
> 46.47	96	79,65% to 99,9%	92.97	90,4% to 95,03%	94.485
> 46.69	96	79,65% to 99,9%	93.16	90,62% to 95,19%	94.58
> 46.95	96	79,65% to 99,9%	93.36	90,84% to 95,36%	94.68
> 47.19	96	79,65% to 99,9%	93.55	91,07% to 95,52%	94.775
> 47.73	96	79,65% to 99,9%	93.75	91,29% to 95,69%	94.875
> 48.53	96	79,65% to 99,9%	93.95	91,52% to 95,85%	94.975
> 48.91	96	79,65% to 99,9%	94.14	91,74% to 96,01%	95.07
> 49.21	96	79,65% to 99,9%	94.34	91,97% to 96,17%	95.17
> 50.15	96	79,65% to 99,9%	94.53	92,19% to 96,34%	95.265
> 51.47	96	79,65% to 99,9%	94.73	92,42% to 96,5%	95.365
> 52.22	96	79,65% to 99,9%	94.92	92,65% to 96,66%	95.46
> 52.38	96	79,65% to 99,9%	95.12	92,88% to 96,82%	95.56
> 52.46	96	79,65% to 99,9%	95.31	93,11% to 96,97%	95.655
> 52.5	96	79,65% to 99,9%	95.51	93,34% to 97,13%	95.755
> 53.15	96	79,65% to 99,9%	95.7	93,57% to 97,29%	95.85
> 53.9	92	73,97% to 99,02%	95.7	93,57% to 97,29%	93.85
> 55.8	92	73,97% to 99,02%	95.9	93,8% to 97,44%	93.95
> 58.63	92	73,97% to 99,02%	96.09	94,03% to 97,6%	94.045
> 60.32	92	73,97% to 99,02%	96.29	94,27% to 97,75%	94.145
> 61.24	88	68,78% to 97,45%	96.29	94,27% to 97,75%	92.145
> 63.84	88	68,78% to 97,45%	96.48	94,5% to 97,9%	92.24
> 66.43	84	63,92% to 95,46%	96.48	94,5% to 97,9%	90.24
> 67.01	84	63,92% to 95,46%	96.68	94,74% to 98,05%	90.34
> 67.35	84	63,92% to 95,46%	96.88	94,97% to 98,2%	90.44
> 67.58	84	63,92% to 95,46%	97.07	95,21% to 98,35%	90.535
> 67.85	84	63,92% to 95,46%	97.27	95,45% to 98,5%	90.635
> 68.59	80	59,3% to 93,17%	97.27	95,45% to 98,5%	88.635
> 69.43	80	59,3% to 93,17%	97.46	95,7% to 98,64%	88.73
> 70.11	80	59,3% to 93,17%	97.66	95,94% to 98,78%	88.83
> 70.66	80	59,3% to 93,17%	97.85	96,19% to 98,92%	88.925
> 70.77	80	59,3% to 93,17%	98.05	96,44% to 99,06%	89.025
> 71.16	76	54,87% to 90,64%	98.05	96,44% to 99,06%	87.025
> 73.3	76	54,87% to 90,64%	98.24	96,69% to 99,19%	87.12
> 76.01	76	54,87% to 90,64%	98.44	96,94% to 99,32%	87.22
> 80.3	76	54,87% to 90,64%	98.63	97,2% to 99,45%	87.315
> 85.74	76	54,87% to 90,64%	98.83	97,47% to 99,57%	87.415
> 87.89	72	50,61% to 87,93%	98.83	97,47% to 99,57%	85.415
> 88.44	72	50,61% to 87,93%	99.02	97,74% to 99,68%	85.51
> 91.15	72	50,61% to 87,93%	99.22	98,01% to 99,79%	85.61
> 95.62	72	50,61% to 87,93%	99.41	98,3% to 99,88%	85.705
> 100.4	72	50,61% to 87,93%	99.61	98,6% to 99,95%	85.805
> 104.2	72	50,61% to 87,93%	99.8	98,92% to 100%	85.9
> 107.2	72	50,61% to 87,93%	100	99,28% to 100%	86
> 109.8	68	46,5% to 85,05%	100	99,28% to 100%	84
> 111.5	64	42,52% to 82,03%	100	99,28% to 100%	82
> 116.7	60	38,67% to 78,87%	100	99,28% to 100%	80
> 125.8	56	34,93% to 75,6%	100	99,28% to 100%	78
> 131	52	31,31% to 72,2%	100	99,28% to 100%	76
> 131.9	48	27,8% to 68,69%	100	99,28% to 100%	74
> 134	44	24,4% to 65,07%	100	99,28% to 100%	72
> 138.8	40	21,13% to 61,33%	100	99,28% to 100%	70
> 144.2	36	17,97% to 57,48%	100	99,28% to 100%	68
> 147.4	32	14,95% to 53,5%	100	99,28% to 100%	66
> 149.5	28	12,07% to 49,39%	100	99,28% to 100%	64
> 150.5	24	9,356% to 45,13%	100	99,28% to 100%	62
> 152.3	20	6,831% to 40,7%	100	99,28% to 100%	60
> 156.2	16	4,538% to 36,08%	100	99,28% to 100%	58
> 160.8	12	2,547% to 31,22%	100	99,28% to 100%	56
> 167.3	8	0,984% to 26,03%	100	99,28% to 100%	54
> 174.9	4	0,1012% to 20,35%	100	99,28% to 100%	52

## Sheet: NGP (TG2-) IgA
Cut off	Sensitivity%	95% CI	Specificity%	95% CI	Accuracy%
> 0.175	86.9	80,85% to 91,61%	12.87	10,09% to 16,08%	49.885
> 0.365	86.9	80,85% to 91,61%	13.06	10,27% to 16,29%	49.98
> 0.425	86.31	80,17% to 91,12%	13.26	10,44% to 16,5%	49.785
> 0.475	86.31	80,17% to 91,12%	13.45	10,62% to 16,71%	49.88
> 0.49	86.31	80,17% to 91,12%	13.65	10,79% to 16,92%	49.98
> 0.51	85.71	79,49% to 90,63%	13.65	10,79% to 16,92%	49.68
> 0.525	85.71	79,49% to 90,63%	13.84	10,97% to 17,13%	49.775
> 0.535	85.71	79,49% to 90,63%	14.04	11,15% to 17,35%	49.875
> 0.555	85.71	79,49% to 90,63%	14.42	11,5% to 17,77%	50.065
> 0.575	85.71	79,49% to 90,63%	14.62	11,68% to 17,98%	50.165
> 0.61	85.71	79,49% to 90,63%	14.81	11,85% to 18,19%	50.26
> 0.645	85.71	79,49% to 90,63%	15.01	12,03% to 18,4%	50.36
> 0.66	85.71	79,49% to 90,63%	15.4	12,39% to 18,82%	50.555
> 0.685	85.71	79,49% to 90,63%	15.59	12,56% to 19,03%	50.65
> 0.71	85.71	79,49% to 90,63%	15.79	12,74% to 19,24%	50.75
> 0.735	85.71	79,49% to 90,63%	15.98	12,92% to 19,45%	50.845
> 0.755	85.71	79,49% to 90,63%	16.18	13,1% to 19,66%	50.945
> 0.765	85.12	78,82% to 90,13%	16.37	13,28% to 19,87%	50.745
> 0.775	85.12	78,82% to 90,13%	16.57	13,45% to 20,07%	50.845
> 0.785	85.12	78,82% to 90,13%	16.76	13,63% to 20,28%	50.94
> 0.795	85.12	78,82% to 90,13%	16.96	13,81% to 20,49%	51.04
> 0.805	85.12	78,82% to 90,13%	17.15	13,99% to 20,7%	51.135
> 0.82	85.12	78,82% to 90,13%	17.35	14,17% to 20,91%	51.235
> 0.835	85.12	78,82% to 90,13%	17.54	14,35% to 21,12%	51.33
> 0.845	85.12	78,82% to 90,13%	17.74	14,53% to 21,32%	51.43
> 0.86	85.12	78,82% to 90,13%	17.93	14,71% to 21,53%	51.525
> 0.88	85.12	78,82% to 90,13%	18.13	14,89% to 21,74%	51.625
> 0.895	84.52	78,15% to 89,63%	18.13	14,89% to 21,74%	51.325
> 0.905	84.52	78,15% to 89,63%	18.52	15,25% to 22,16%	51.52
> 0.915	83.93	77,49% to 89,13%	18.52	15,25% to 22,16%	51.225
> 0.925	83.93	77,49% to 89,13%	18.71	15,43% to 22,36%	51.32
> 0.96	83.93	77,49% to 89,13%	18.91	15,61% to 22,57%	51.42
> 0.995	83.33	76,82% to 88,63%	18.91	15,61% to 22,57%	51.12
> 1.005	83.33	76,82% to 88,63%	19.1	15,79% to 22,78%	51.215
> 1.02	82.14	75,5% to 87,62%	19.1	15,79% to 22,78%	50.62
> 1.04	82.14	75,5% to 87,62%	19.3	15,97% to 22,98%	50.72
> 1.06	80.95	74,19% to 86,59%	19.88	16,51% to 23,6%	50.415
> 1.085	80.95	74,19% to 86,59%	20.27	16,88% to 24,02%	50.61
> 1.105	80.95	74,19% to 86,59%	20.66	17,24% to 24,43%	50.805
> 1.13	80.36	73,54% to 86,08%	20.86	17,42% to 24,63%	50.61
> 1.155	80.36	73,54% to 86,08%	21.05	17,6% to 24,84%	50.705
> 1.165	80.36	73,54% to 86,08%	21.25	17,78% to 25,05%	50.805
> 1.2	80.36	73,54% to 86,08%	21.44	17,97% to 25,25%	50.9
> 1.235	80.36	73,54% to 86,08%	22.03	18,51% to 25,87%	51.195
> 1.25	80.36	73,54% to 86,08%	22.42	18,88% to 26,28%	51.39
> 1.275	80.36	73,54% to 86,08%	22.61	19,06% to 26,48%	51.485
> 1.295	80.36	73,54% to 86,08%	22.81	19,24% to 26,69%	51.585
> 1.305	80.36	73,54% to 86,08%	23	19,43% to 26,89%	51.68
> 1.34	80.36	73,54% to 86,08%	23.2	19,61% to 27,1%	51.78
> 1.375	80.36	73,54% to 86,08%	23.39	19,79% to 27,3%	51.875
> 1.385	80.36	73,54% to 86,08%	23.59	19,98% to 27,5%	51.975
> 1.415	79.76	72,88% to 85,56%	23.98	20,34% to 27,91%	51.87
> 1.445	79.76	72,88% to 85,56%	24.17	20,53% to 28,12%	51.965
> 1.455	79.76	72,88% to 85,56%	24.56	20,89% to 28,52%	52.16
> 1.475	79.17	72,24% to 85,04%	24.76	21,08% to 28,73%	51.965
> 1.515	79.17	72,24% to 85,04%	24.95	21,26% to 28,93%	52.06
> 1.545	79.17	72,24% to 85,04%	25.15	21,45% to 29,13%	52.16
> 1.555	79.17	72,24% to 85,04%	25.34	21,63% to 29,34%	52.255
> 1.565	78.57	71,59% to 84,52%	25.34	21,63% to 29,34%	51.955
> 1.585	77.98	70,94% to 83,99%	25.34	21,63% to 29,34%	51.66
> 1.605	77.38	70,3% to 83,47%	25.34	21,63% to 29,34%	51.36
> 1.615	76.79	69,66% to 82,94%	25.34	21,63% to 29,34%	51.065
> 1.63	76.79	69,66% to 82,94%	25.54	21,82% to 29,54%	51.165
> 1.65	76.79	69,66% to 82,94%	25.73	22% to 29,74%	51.26
> 1.675	76.19	69,02% to 82,41%	25.73	22% to 29,74%	50.96
> 1.705	76.19	69,02% to 82,41%	25.93	22,18% to 29,95%	51.06
> 1.73	76.19	69,02% to 82,41%	26.12	22,37% to 30,15%	51.155
> 1.765	76.19	69,02% to 82,41%	26.32	22,55% to 30,35%	51.255
> 1.795	76.19	69,02% to 82,41%	26.51	22,74% to 30,56%	51.35
> 1.805	76.19	69,02% to 82,41%	26.9	23,11% to 30,96%	51.545
> 1.815	76.19	69,02% to 82,41%	27.1	23,29% to 31,16%	51.645
> 1.825	76.19	69,02% to 82,41%	27.49	23,66% to 31,57%	51.84
> 1.835	75.6	68,38% to 81,88%	27.68	23,85% to 31,77%	51.64
> 1.845	75	67,75% to 81,35%	27.68	23,85% to 31,77%	51.34
> 1.855	75	67,75% to 81,35%	27.88	24,03% to 31,97%	51.44
> 1.87	75	67,75% to 81,35%	28.07	24,22% to 32,17%	51.535
> 1.92	74.4	67,11% to 80,82%	28.27	24,41% to 32,38%	51.335
> 1.965	73.81	66,48% to 80,28%	28.27	24,41% to 32,38%	51.04
> 1.975	73.81	66,48% to 80,28%	28.46	24,59% to 32,58%	51.135
> 1.985	73.81	66,48% to 80,28%	28.65	24,78% to 32,78%	51.23
> 2	73.81	66,48% to 80,28%	29.04	25,15% to 33,18%	51.425
> 2.015	73.81	66,48% to 80,28%	29.24	25,34% to 33,39%	51.525
> 2.03	73.81	66,48% to 80,28%	29.43	25,52% to 33,59%	51.62
> 2.05	73.81	66,48% to 80,28%	30.02	26,08% to 34,19%	51.915
> 2.065	73.81	66,48% to 80,28%	30.21	26,27% to 34,39%	52.01
> 2.075	73.81	66,48% to 80,28%	30.6	26,64% to 34,79%	52.205
> 2.09	73.81	66,48% to 80,28%	30.8	26,83% to 34,99%	52.305
> 2.105	73.81	66,48% to 80,28%	30.99	27,01% to 35,19%	52.4
> 2.13	73.81	66,48% to 80,28%	31.19	27,2% to 35,4%	52.5
> 2.16	73.81	66,48% to 80,28%	31.38	27,39% to 35,6%	52.595
> 2.175	73.81	66,48% to 80,28%	31.77	27,76% to 36%	52.79
> 2.185	73.21	65,85% to 79,74%	31.77	27,76% to 36%	52.49
> 2.2	73.21	65,85% to 79,74%	31.97	27,95% to 36,2%	52.59
> 2.22	73.21	65,85% to 79,74%	32.16	28,14% to 36,4%	52.685
> 2.245	73.21	65,85% to 79,74%	32.36	28,32% to 36,6%	52.785
> 2.295	73.21	65,85% to 79,74%	32.55	28,51% to 36,8%	52.88
> 2.345	73.21	65,85% to 79,74%	32.75	28,7% to 37%	52.98
> 2.38	73.21	65,85% to 79,74%	32.94	28,89% to 37,2%	53.075
> 2.41	72.62	65,22% to 79,2%	32.94	28,89% to 37,2%	52.78
> 2.43	72.62	65,22% to 79,2%	33.14	29,07% to 37,4%	52.88
> 2.445	72.62	65,22% to 79,2%	33.33	29,26% to 37,6%	52.975
> 2.46	72.62	65,22% to 79,2%	33.72	29,64% to 38%	53.17
> 2.48	72.62	65,22% to 79,2%	33.92	29,83% to 38,2%	53.27
> 2.52	71.43	63,96% to 78,12%	33.92	29,83% to 38,2%	52.675
> 2.56	71.43	63,96% to 78,12%	34.11	30,01% to 38,4%	52.77
> 2.605	71.43	63,96% to 78,12%	34.31	30,2% to 38,59%	52.87
> 2.655	71.43	63,96% to 78,12%	34.5	30,39% to 38,79%	52.965
> 2.68	71.43	63,96% to 78,12%	34.7	30,58% to 38,99%	53.065
> 2.705	71.43	63,96% to 78,12%	34.89	30,77% to 39,19%	53.16
> 2.73	71.43	63,96% to 78,12%	35.09	30,96% to 39,39%	53.26
> 2.77	71.43	63,96% to 78,12%	35.28	31,15% to 39,59%	53.355
> 2.805	70.83	63,34% to 77,58%	35.28	31,15% to 39,59%	53.055
> 2.815	70.24	62,71% to 77,04%	35.48	31,33% to 39,79%	52.86
> 2.84	70.24	62,71% to 77,04%	35.67	31,52% to 39,99%	52.955
> 2.88	70.24	62,71% to 77,04%	35.87	31,71% to 40,19%	53.055
> 2.905	70.24	62,71% to 77,04%	36.06	31,9% to 40,39%	53.15
> 2.915	69.64	62,09% to 76,49%	36.26	32,09% to 40,58%	52.95
> 2.94	69.64	62,09% to 76,49%	36.45	32,28% to 40,78%	53.045
> 3	69.64	62,09% to 76,49%	36.84	32,66% to 41,18%	53.24
> 3.055	69.64	62,09% to 76,49%	37.04	32,85% to 41,38%	53.34
> 3.075	69.64	62,09% to 76,49%	37.23	33,04% to 41,58%	53.435
> 3.115	69.64	62,09% to 76,49%	37.62	33,41% to 41,97%	53.63
> 3.16	69.64	62,09% to 76,49%	37.82	33,6% to 42,17%	53.73
> 3.175	69.64	62,09% to 76,49%	38.01	33,79% to 42,37%	53.825
> 3.185	69.64	62,09% to 76,49%	38.21	33,98% to 42,57%	53.925
> 3.28	69.64	62,09% to 76,49%	38.6	34,36% to 42,96%	54.12
> 3.375	69.64	62,09% to 76,49%	38.79	34,55% to 43,16%	54.215
> 3.4	69.64	62,09% to 76,49%	39.18	34,93% to 43,56%	54.41
> 3.435	69.05	61,47% to 75,94%	39.57	35,31% to 43,95%	54.31
> 3.48	69.05	61,47% to 75,94%	39.77	35,5% to 44,15%	54.41
> 3.525	69.05	61,47% to 75,94%	39.96	35,69% to 44,34%	54.505
> 3.545	69.05	61,47% to 75,94%	40.16	35,88% to 44,54%	54.605
> 3.555	69.05	61,47% to 75,94%	40.35	36,07% to 44,74%	54.7
> 3.565	69.05	61,47% to 75,94%	40.55	36,26% to 44,94%	54.8
> 3.58	68.45	60,85% to 75,39%	40.55	36,26% to 44,94%	54.5
> 3.615	68.45	60,85% to 75,39%	40.74	36,46% to 45,13%	54.595
> 3.665	68.45	60,85% to 75,39%	40.94	36,65% to 45,33%	54.695
> 3.695	67.86	60,23% to 74,84%	41.13	36,84% to 45,53%	54.495
> 3.705	67.26	59,61% to 74,29%	41.13	36,84% to 45,53%	54.195
> 3.725	66.67	58,99% to 73,74%	41.33	37,03% to 45,72%	54
> 3.755	66.67	58,99% to 73,74%	41.52	37,22% to 45,92%	54.095
> 3.775	66.67	58,99% to 73,74%	41.72	37,41% to 46,12%	54.195
> 3.81	66.67	58,99% to 73,74%	41.91	37,6% to 46,31%	54.29
> 3.86	66.67	58,99% to 73,74%	42.11	37,79% to 46,51%	54.39
> 3.885	66.67	58,99% to 73,74%	42.3	37,98% to 46,71%	54.485
> 3.915	66.07	58,38% to 73,19%	42.3	37,98% to 46,71%	54.185
> 3.975	66.07	58,38% to 73,19%	42.5	38,17% to 46,9%	54.285
> 4.015	65.48	57,76% to 72,63%	42.5	38,17% to 46,9%	53.99
> 4.03	64.88	57,15% to 72,07%	42.69	38,37% to 47,1%	53.785
> 4.06	64.88	57,15% to 72,07%	42.88	38,56% to 47,3%	53.88
> 4.11	64.88	57,15% to 72,07%	43.27	38,94% to 47,69%	54.075
> 4.165	64.88	57,15% to 72,07%	43.47	39,13% to 47,88%	54.175
> 4.21	64.88	57,15% to 72,07%	43.66	39,32% to 48,08%	54.27
> 4.255	64.29	56,54% to 71,52%	43.86	39,51% to 48,28%	54.075
> 4.3	64.29	56,54% to 71,52%	44.05	39,71% to 48,47%	54.17
> 4.35	63.69	55,93% to 70,96%	44.05	39,71% to 48,47%	53.87
> 4.395	63.1	55,32% to 70,4%	44.05	39,71% to 48,47%	53.575
> 4.435	63.1	55,32% to 70,4%	44.25	39,9% to 48,67%	53.675
> 4.475	62.5	54,71% to 69,84%	44.44	40,09% to 48,86%	53.47
> 4.5	62.5	54,71% to 69,84%	44.64	40,28% to 49,06%	53.57
> 4.52	62.5	54,71% to 69,84%	44.83	40,47% to 49,25%	53.665
> 4.58	62.5	54,71% to 69,84%	45.03	40,67% to 49,45%	53.765
> 4.655	62.5	54,71% to 69,84%	45.22	40,86% to 49,65%	53.86
> 4.725	62.5	54,71% to 69,84%	45.42	41,05% to 49,84%	53.96
> 4.775	62.5	54,71% to 69,84%	45.61	41,24% to 50,04%	54.055
> 4.815	61.9	54,11% to 69,28%	45.61	41,24% to 50,04%	53.755
> 4.9	61.9	54,11% to 69,28%	45.81	41,43% to 50,23%	53.855
> 4.97	61.9	54,11% to 69,28%	46	41,63% to 50,43%	53.95
> 5.05	61.9	54,11% to 69,28%	46.2	41,82% to 50,62%	54.05
> 5.16	61.9	54,11% to 69,28%	46.39	42,01% to 50,82%	54.145
> 5.25	61.9	54,11% to 69,28%	46.59	42,21% to 51,01%	54.245
> 5.305	61.9	54,11% to 69,28%	46.78	42,4% to 51,21%	54.34
> 5.335	61.31	53,5% to 68,71%	46.78	42,4% to 51,21%	54.045
> 5.375	61.31	53,5% to 68,71%	46.98	42,59% to 51,4%	54.145
> 5.41	61.31	53,5% to 68,71%	47.17	42,78% to 51,6%	54.24
> 5.425	61.31	53,5% to 68,71%	47.37	42,98% to 51,79%	54.34
> 5.465	61.31	53,5% to 68,71%	47.56	43,17% to 51,99%	54.435
> 5.505	61.31	53,5% to 68,71%	47.76	43,36% to 52,18%	54.535
> 5.52	60.71	52,9% to 68,15%	47.76	43,36% to 52,18%	54.235
> 5.585	60.71	52,9% to 68,15%	47.95	43,56% to 52,37%	54.33
> 5.685	60.71	52,9% to 68,15%	48.15	43,75% to 52,57%	54.43
> 5.74	60.12	52,29% to 67,58%	48.15	43,75% to 52,57%	54.135
> 5.825	60.12	52,29% to 67,58%	48.54	44,13% to 52,96%	54.33
> 5.94	60.12	52,29% to 67,58%	48.73	44,33% to 53,15%	54.425
> 6.01	60.12	52,29% to 67,58%	48.93	44,52% to 53,35%	54.525
> 6.08	60.12	52,29% to 67,58%	49.32	44,91% to 53,73%	54.72
> 6.125	60.12	52,29% to 67,58%	49.51	45,1% to 53,93%	54.815
> 6.175	60.12	52,29% to 67,58%	49.71	45,3% to 54,12%	54.915
> 6.235	60.12	52,29% to 67,58%	49.9	45,49% to 54,32%	55.01
> 6.26	60.12	52,29% to 67,58%	50.1	45,68% to 54,51%	55.11
> 6.295	60.12	52,29% to 67,58%	50.29	45,88% to 54,7%	55.205
> 6.39	59.52	51,69% to 67,02%	50.29	45,88% to 54,7%	54.905
> 6.53	59.52	51,69% to 67,02%	50.49	46,07% to 54,9%	55.005
> 6.63	59.52	51,69% to 67,02%	50.68	46,27% to 55,09%	55.1
> 6.7	59.52	51,69% to 67,02%	50.88	46,46% to 55,28%	55.2
> 6.785	59.52	51,69% to 67,02%	51.07	46,65% to 55,48%	55.295
> 6.835	59.52	51,69% to 67,02%	51.27	46,85% to 55,67%	55.395
> 6.865	58.93	51,09% to 66,45%	51.27	46,85% to 55,67%	55.1
> 6.915	58.93	51,09% to 66,45%	51.46	47,04% to 55,87%	55.195
> 6.95	58.93	51,09% to 66,45%	51.66	47,24% to 56,06%	55.295
> 6.975	58.93	51,09% to 66,45%	51.85	47,43% to 56,25%	55.39
> 7.175	58.93	51,09% to 66,45%	52.24	47,82% to 56,64%	55.585
> 7.375	58.93	51,09% to 66,45%	52.44	48,01% to 56,83%	55.685
> 7.41	58.93	51,09% to 66,45%	52.63	48,21% to 57,02%	55.78
> 7.46	58.33	50,49% to 65,88%	52.63	48,21% to 57,02%	55.48
> 7.505	57.74	49,89% to 65,31%	52.63	48,21% to 57,02%	55.185
> 7.57	57.74	49,89% to 65,31%	52.83	48,4% to 57,22%	55.285
> 7.645	57.14	49,29% to 64,74%	52.83	48,4% to 57,22%	54.985
> 7.69	57.14	49,29% to 64,74%	53.02	48,6% to 57,41%	55.08
> 7.75	57.14	49,29% to 64,74%	53.22	48,79% to 57,6%	55.18
> 7.84	57.14	49,29% to 64,74%	53.41	48,99% to 57,79%	55.275
> 7.905	56.55	48,7% to 64,16%	53.41	48,99% to 57,79%	54.98
> 7.955	56.55	48,7% to 64,16%	53.8	49,38% to 58,18%	55.175
> 8.1	55.95	48,1% to 63,59%	53.8	49,38% to 58,18%	54.875
> 8.255	55.95	48,1% to 63,59%	54	49,57% to 58,37%	54.975
> 8.38	55.95	48,1% to 63,59%	54.19	49,77% to 58,57%	55.07
> 8.475	55.95	48,1% to 63,59%	54.39	49,96% to 58,76%	55.17
> 8.525	55.95	48,1% to 63,59%	54.58	50,16% to 58,95%	55.265
> 8.62	55.36	47,5% to 63,02%	54.58	50,16% to 58,95%	54.97
> 8.73	55.36	47,5% to 63,02%	54.78	50,35% to 59,14%	55.07
> 8.79	55.36	47,5% to 63,02%	54.97	50,55% to 59,33%	55.165
> 8.805	55.36	47,5% to 63,02%	55.17	50,75% to 59,53%	55.265
> 8.83	55.36	47,5% to 63,02%	55.36	50,94% to 59,72%	55.36
> 8.865	55.36	47,5% to 63,02%	55.56	51,14% to 59,91%	55.46
> 8.96	55.36	47,5% to 63,02%	55.75	51,33% to 60,1%	55.555
> 9.05	55.36	47,5% to 63,02%	55.95	51,53% to 60,29%	55.655
> 9.07	55.36	47,5% to 63,02%	56.14	51,72% to 60,49%	55.75
> 9.12	55.36	47,5% to 63,02%	56.34	51,92% to 60,68%	55.85
> 9.215	55.36	47,5% to 63,02%	56.53	52,12% to 60,87%	55.945
> 9.29	55.36	47,5% to 63,02%	56.73	52,31% to 61,06%	56.045
> 9.34	54.76	46,91% to 62,44%	56.73	52,31% to 61,06%	55.745
> 9.415	54.76	46,91% to 62,44%	56.92	52,51% to 61,25%	55.84
> 9.51	54.17	46,32% to 61,86%	56.92	52,51% to 61,25%	55.545
> 9.61	54.17	46,32% to 61,86%	57.12	52,7% to 61,44%	55.645
> 9.755	54.17	46,32% to 61,86%	57.31	52,9% to 61,63%	55.74
> 9.88	54.17	46,32% to 61,86%	57.5	53,1% to 61,83%	55.835
> 10.02	54.17	46,32% to 61,86%	57.89	53,49% to 62,21%	56.03
> 10.14	53.57	45,73% to 61,29%	57.89	53,49% to 62,21%	55.73
> 10.19	53.57	45,73% to 61,29%	58.48	54,08% to 62,78%	56.025
> 10.32	53.57	45,73% to 61,29%	58.67	54,28% to 62,97%	56.12
> 10.55	52.98	45,14% to 60,71%	58.87	54,47% to 63,16%	55.925
> 10.71	52.98	45,14% to 60,71%	59.06	54,67% to 63,35%	56.02
> 10.85	52.98	45,14% to 60,71%	59.26	54,87% to 63,54%	56.12
> 11.02	52.98	45,14% to 60,71%	59.45	55,06% to 63,74%	56.215
> 11.1	52.98	45,14% to 60,71%	59.65	55,26% to 63,93%	56.315
> 11.12	52.98	45,14% to 60,71%	59.84	55,46% to 64,12%	56.41
> 11.13	52.98	45,14% to 60,71%	60.04	55,66% to 64,31%	56.51
> 11.21	52.98	45,14% to 60,71%	60.23	55,85% to 64,5%	56.605
> 11.31	52.98	45,14% to 60,71%	60.43	56,05% to 64,69%	56.705
> 11.36	52.98	45,14% to 60,71%	60.62	56,25% to 64,88%	56.8
> 11.41	52.98	45,14% to 60,71%	60.82	56,44% to 65,07%	56.9
> 11.47	52.98	45,14% to 60,71%	61.01	56,64% to 65,26%	56.995
> 11.49	52.98	45,14% to 60,71%	61.21	56,84% to 65,45%	57.095
> 11.52	52.98	45,14% to 60,71%	61.4	57,04% to 65,64%	57.19
> 11.59	52.98	45,14% to 60,71%	61.6	57,24% to 65,83%	57.29
> 11.71	52.38	44,55% to 60,13%	61.6	57,24% to 65,83%	56.99
> 11.81	52.38	44,55% to 60,13%	61.79	57,43% to 66,02%	57.085
> 12.06	52.38	44,55% to 60,13%	61.99	57,63% to 66,21%	57.185
> 12.28	52.38	44,55% to 60,13%	62.18	57,83% to 66,4%	57.28
> 12.32	52.38	44,55% to 60,13%	62.38	58,03% to 66,59%	57.38
> 12.38	52.38	44,55% to 60,13%	62.57	58,23% to 66,78%	57.475
> 12.5	52.38	44,55% to 60,13%	62.77	58,42% to 66,96%	57.575
> 12.61	52.38	44,55% to 60,13%	62.96	58,62% to 67,15%	57.67
> 12.69	52.38	44,55% to 60,13%	63.16	58,82% to 67,34%	57.77
> 12.82	51.79	43,96% to 59,55%	63.16	58,82% to 67,34%	57.475
> 12.91	51.79	43,96% to 59,55%	63.35	59,02% to 67,53%	57.57
> 12.98	51.79	43,96% to 59,55%	63.55	59,22% to 67,72%	57.67
> 13.12	51.79	43,96% to 59,55%	63.74	59,42% to 67,91%	57.765
> 13.25	51.79	43,96% to 59,55%	63.94	59,61% to 68,1%	57.865
> 13.32	51.79	43,96% to 59,55%	64.13	59,81% to 68,29%	57.96
> 13.37	51.19	43,37% to 58,97%	64.13	59,81% to 68,29%	57.66
> 13.44	51.19	43,37% to 58,97%	64.33	60,01% to 68,48%	57.76
> 13.5	50.6	42,79% to 58,38%	64.52	60,21% to 68,67%	57.56
> 13.56	50.6	42,79% to 58,38%	64.72	60,41% to 68,85%	57.66
> 13.65	50.6	42,79% to 58,38%	64.91	60,61% to 69,04%	57.755
> 13.71	50.6	42,79% to 58,38%	65.11	60,81% to 69,23%	57.855
> 13.78	50	42,2% to 57,8%	65.11	60,81% to 69,23%	57.555
> 13.85	49.4	41,62% to 57,21%	65.3	61,01% to 69,42%	57.35
> 13.87	49.4	41,62% to 57,21%	65.5	61,21% to 69,61%	57.45
> 13.9	49.4	41,62% to 57,21%	65.69	61,41% to 69,8%	57.545
> 13.93	48.81	41,03% to 56,63%	65.69	61,41% to 69,8%	57.25
> 13.95	48.21	40,45% to 56,04%	65.69	61,41% to 69,8%	56.95
> 13.96	48.21	40,45% to 56,04%	65.89	61,6% to 69,99%	57.05
> 13.97	48.21	40,45% to 56,04%	66.08	61,8% to 70,17%	57.145
> 14.05	48.21	40,45% to 56,04%	66.28	62% to 70,36%	57.245
> 14.14	48.21	40,45% to 56,04%	66.47	62,2% to 70,55%	57.34
> 14.27	48.21	40,45% to 56,04%	66.67	62,4% to 70,74%	57.44
> 14.39	48.21	40,45% to 56,04%	66.86	62,6% to 70,93%	57.535
> 14.41	48.21	40,45% to 56,04%	67.06	62,8% to 71,11%	57.635
> 14.5	48.21	40,45% to 56,04%	67.25	63% to 71,3%	57.73
> 14.67	48.21	40,45% to 56,04%	67.45	63,2% to 71,49%	57.83
> 14.79	47.62	39,87% to 55,45%	67.45	63,2% to 71,49%	57.535
> 14.85	47.62	39,87% to 55,45%	67.64	63,4% to 71,68%	57.63
> 14.92	47.02	39,29% to 54,86%	67.64	63,4% to 71,68%	57.33
> 15.17	47.02	39,29% to 54,86%	67.84	63,6% to 71,86%	57.43
> 15.53	47.02	39,29% to 54,86%	68.03	63,8% to 72,05%	57.525
> 15.76	47.02	39,29% to 54,86%	68.23	64% to 72,24%	57.625
> 15.87	47.02	39,29% to 54,86%	68.42	64,2% to 72,42%	57.72
> 15.93	47.02	39,29% to 54,86%	68.62	64,4% to 72,61%	57.82
> 16.13	47.02	39,29% to 54,86%	68.81	64,6% to 72,8%	57.915
> 16.33	47.02	39,29% to 54,86%	69.01	64,81% to 72,99%	58.015
> 16.37	47.02	39,29% to 54,86%	69.2	65,01% to 73,17%	58.11
> 16.52	46.43	38,71% to 54,27%	69.2	65,01% to 73,17%	57.815
> 16.69	46.43	38,71% to 54,27%	69.4	65,21% to 73,36%	57.915
> 16.92	46.43	38,71% to 54,27%	69.59	65,41% to 73,55%	58.01
> 17.17	46.43	38,71% to 54,27%	69.79	65,61% to 73,73%	58.11
> 17.22	45.83	38,14% to 53,68%	69.79	65,61% to 73,73%	57.81
> 17.37	45.24	37,56% to 53,09%	69.79	65,61% to 73,73%	57.515
> 17.59	45.24	37,56% to 53,09%	69.98	65,81% to 73,92%	57.61
> 17.71	45.24	37,56% to 53,09%	70.18	66,01% to 74,11%	57.71
> 17.99	45.24	37,56% to 53,09%	70.37	66,21% to 74,29%	57.805
> 18.29	44.64	36,98% to 52,5%	70.37	66,21% to 74,29%	57.505
> 18.37	44.64	36,98% to 52,5%	70.57	66,41% to 74,48%	57.605
> 18.43	44.64	36,98% to 52,5%	70.76	66,61% to 74,66%	57.7
> 18.55	44.64	36,98% to 52,5%	70.96	66,82% to 74,85%	57.8
> 18.76	44.05	36,41% to 51,9%	70.96	66,82% to 74,85%	57.505
> 19.2	43.45	35,84% to 51,3%	70.96	66,82% to 74,85%	57.205
> 19.62	43.45	35,84% to 51,3%	71.15	67,02% to 75,04%	57.3
> 19.75	43.45	35,84% to 51,3%	71.35	67,22% to 75,22%	57.4
> 19.8	43.45	35,84% to 51,3%	71.54	67,42% to 75,41%	57.495
> 19.88	43.45	35,84% to 51,3%	71.73	67,62% to 75,59%	57.59
> 20.07	43.45	35,84% to 51,3%	71.93	67,83% to 75,78%	57.69
> 20.34	43.45	35,84% to 51,3%	72.12	68,03% to 75,97%	57.785
> 20.58	43.45	35,84% to 51,3%	72.32	68,23% to 76,15%	57.885
> 20.72	42.86	35,26% to 50,71%	72.32	68,23% to 76,15%	57.59
> 20.79	42.86	35,26% to 50,71%	72.51	68,43% to 76,34%	57.685
> 21.24	42.26	34,69% to 50,11%	72.51	68,43% to 76,34%	57.385
> 21.81	42.26	34,69% to 50,11%	72.71	68,63% to 76,52%	57.485
> 21.98	42.26	34,69% to 50,11%	72.9	68,84% to 76,71%	57.58
> 22.07	42.26	34,69% to 50,11%	73.1	69,04% to 76,89%	57.68
> 22.27	42.26	34,69% to 50,11%	73.29	69,24% to 77,08%	57.775
> 22.42	42.26	34,69% to 50,11%	73.49	69,44% to 77,26%	57.875
> 22.64	42.26	34,69% to 50,11%	73.68	69,65% to 77,45%	57.97
> 22.84	42.26	34,69% to 50,11%	73.88	69,85% to 77,63%	58.07
> 22.99	41.67	34,12% to 49,51%	73.88	69,85% to 77,63%	57.775
> 23.19	41.67	34,12% to 49,51%	74.07	70,05% to 77,82%	57.87
> 23.34	41.67	34,12% to 49,51%	74.27	70,26% to 78%	57.97
> 23.5	41.67	34,12% to 49,51%	74.46	70,46% to 78,18%	58.065
> 23.67	41.07	33,55% to 48,91%	74.46	70,46% to 78,18%	57.765
> 23.76	41.07	33,55% to 48,91%	74.66	70,66% to 78,37%	57.865
> 23.81	40.48	32,98% to 48,31%	74.66	70,66% to 78,37%	57.57
> 24.02	39.88	32,42% to 47,71%	74.66	70,66% to 78,37%	57.27
> 24.41	39.88	32,42% to 47,71%	74.85	70,87% to 78,55%	57.365
> 24.65	39.88	32,42% to 47,71%	75.05	71,07% to 78,74%	57.465
> 24.72	39.29	31,85% to 47,1%	75.05	71,07% to 78,74%	57.17
> 25.14	39.29	31,85% to 47,1%	75.24	71,27% to 78,92%	57.265
> 25.67	39.29	31,85% to 47,1%	75.44	71,48% to 79,11%	57.365
> 25.95	39.29	31,85% to 47,1%	75.63	71,68% to 79,29%	57.46
> 26.38	39.29	31,85% to 47,1%	75.83	71,88% to 79,47%	57.56
> 26.8	38.69	31,29% to 46,5%	75.83	71,88% to 79,47%	57.26
> 27.01	38.69	31,29% to 46,5%	76.02	72,09% to 79,66%	57.355
> 27.3	38.1	30,72% to 45,89%	76.02	72,09% to 79,66%	57.06
> 27.61	37.5	30,16% to 45,29%	76.02	72,09% to 79,66%	56.76
> 27.84	36.9	29,6% to 44,68%	76.02	72,09% to 79,66%	56.46
> 27.99	36.31	29,04% to 44,07%	76.02	72,09% to 79,66%	56.165
> 28.19	36.31	29,04% to 44,07%	76.22	72,29% to 79,84%	56.265
> 28.44	36.31	29,04% to 44,07%	76.41	72,5% to 80,02%	56.36
> 28.9	36.31	29,04% to 44,07%	76.61	72,7% to 80,21%	56.46
> 29.38	36.31	29,04% to 44,07%	76.8	72,9% to 80,39%	56.555
> 29.53	36.31	29,04% to 44,07%	77	73,11% to 80,57%	56.655
> 29.62	36.31	29,04% to 44,07%	77.19	73,31% to 80,76%	56.75
> 29.7	36.31	29,04% to 44,07%	77.39	73,52% to 80,94%	56.85
> 29.84	36.31	29,04% to 44,07%	77.58	73,72% to 81,12%	56.945
> 30.17	36.31	29,04% to 44,07%	77.78	73,93% to 81,3%	57.045
> 30.41	36.31	29,04% to 44,07%	77.97	74,13% to 81,49%	57.14
> 30.53	36.31	29,04% to 44,07%	78.17	74,34% to 81,67%	57.24
> 31.04	36.31	29,04% to 44,07%	78.36	74,54% to 81,85%	57.335
> 31.46	36.31	29,04% to 44,07%	78.56	74,75% to 82,03%	57.435
> 31.74	35.71	28,48% to 43,46%	78.56	74,75% to 82,03%	57.135
> 32.14	35.71	28,48% to 43,46%	78.75	74,95% to 82,22%	57.23
> 32.5	35.71	28,48% to 43,46%	78.95	75,16% to 82,4%	57.33
> 32.92	35.71	28,48% to 43,46%	79.14	75,37% to 82,58%	57.425
> 33.13	35.12	27,93% to 42,85%	79.14	75,37% to 82,58%	57.13
> 33.33	34.52	27,37% to 42,24%	79.14	75,37% to 82,58%	56.83
> 33.5	34.52	27,37% to 42,24%	79.34	75,57% to 82,76%	56.93
> 33.62	34.52	27,37% to 42,24%	79.53	75,78% to 82,94%	57.025
> 33.81	34.52	27,37% to 42,24%	79.73	75,98% to 83,12%	57.125
> 34.34	34.52	27,37% to 42,24%	79.92	76,19% to 83,31%	57.22
> 34.87	34.52	27,37% to 42,24%	80.12	76,4% to 83,49%	57.32
> 35.16	34.52	27,37% to 42,24%	80.31	76,6% to 83,67%	57.415
> 35.5	34.52	27,37% to 42,24%	80.51	76,81% to 83,85%	57.515
> 35.66	33.93	26,81% to 41,62%	80.51	76,81% to 83,85%	57.22
> 35.77	33.93	26,81% to 41,62%	80.7	77,02% to 84,03%	57.315
> 36.05	33.93	26,81% to 41,62%	80.9	77,22% to 84,21%	57.415
> 36.4	33.93	26,81% to 41,62%	81.09	77,43% to 84,39%	57.51
> 36.64	33.93	26,81% to 41,62%	81.29	77,64% to 84,57%	57.61
> 36.92	33.93	26,81% to 41,62%	81.48	77,84% to 84,75%	57.705
> 37.67	33.93	26,81% to 41,62%	81.68	78,05% to 84,93%	57.805
> 38.92	33.93	26,81% to 41,62%	81.87	78,26% to 85,11%	57.9
> 40.08	33.93	26,81% to 41,62%	82.07	78,47% to 85,29%	58
> 40.89	33.93	26,81% to 41,62%	82.26	78,68% to 85,47%	58.095
> 41.51	33.33	26,26% to 41,01%	82.26	78,68% to 85,47%	57.795
> 41.77	32.74	25,71% to 40,39%	82.26	78,68% to 85,47%	57.5
> 42.19	32.14	25,16% to 39,77%	82.26	78,68% to 85,47%	57.2
> 42.67	32.14	25,16% to 39,77%	82.46	78,88% to 85,65%	57.3
> 42.78	32.14	25,16% to 39,77%	82.65	79,09% to 85,83%	57.395
> 42.86	32.14	25,16% to 39,77%	82.85	79,3% to 86,01%	57.495
> 43.12	32.14	25,16% to 39,77%	83.04	79,51% to 86,19%	57.59
> 43.35	32.14	25,16% to 39,77%	83.24	79,72% to 86,37%	57.69
> 43.55	31.55	24,61% to 39,15%	83.24	79,72% to 86,37%	57.395
> 43.95	31.55	24,61% to 39,15%	83.43	79,93% to 86,55%	57.49
> 44.5	31.55	24,61% to 39,15%	83.63	80,13% to 86,72%	57.59
> 44.84	30.95	24,06% to 38,53%	83.63	80,13% to 86,72%	57.29
> 45.09	30.95	24,06% to 38,53%	83.82	80,34% to 86,9%	57.385
> 45.41	30.95	24,06% to 38,53%	84.02	80,55% to 87,08%	57.485
> 46.07	30.95	24,06% to 38,53%	84.21	80,76% to 87,26%	57.58
> 46.96	30.36	23,51% to 37,91%	84.21	80,76% to 87,26%	57.285
> 47.72	30.36	23,51% to 37,91%	84.41	80,97% to 87,44%	57.385
> 48.15	30.36	23,51% to 37,91%	84.6	81,18% to 87,61%	57.48
> 48.91	30.36	23,51% to 37,91%	84.8	81,39% to 87,79%	57.58
> 49.86	30.36	23,51% to 37,91%	84.99	81,6% to 87,97%	57.675
> 50.23	30.36	23,51% to 37,91%	85.19	81,81% to 88,15%	57.775
> 50.44	30.36	23,51% to 37,91%	85.38	82,02% to 88,32%	57.87
> 50.51	30.36	23,51% to 37,91%	85.58	82,23% to 88,5%	57.97
> 50.55	29.76	22,96% to 37,29%	85.58	82,23% to 88,5%	57.67
> 51.69	29.76	22,96% to 37,29%	85.77	82,44% to 88,68%	57.765
> 53.06	29.76	22,96% to 37,29%	85.96	82,65% to 88,85%	57.86
> 53.54	29.17	22,42% to 36,66%	85.96	82,65% to 88,85%	57.565
> 53.93	29.17	22,42% to 36,66%	86.16	82,87% to 89,03%	57.665
> 54.22	28.57	21,88% to 36,04%	86.16	82,87% to 89,03%	57.365
> 54.86	28.57	21,88% to 36,04%	86.35	83,08% to 89,21%	57.46
> 55.67	28.57	21,88% to 36,04%	86.55	83,29% to 89,38%	57.56
> 56.63	28.57	21,88% to 36,04%	86.74	83,5% to 89,56%	57.655
> 57.56	27.98	21,34% to 35,41%	86.74	83,5% to 89,56%	57.36
> 58.19	27.98	21,34% to 35,41%	86.94	83,71% to 89,73%	57.46
> 59	27.38	20,8% to 34,78%	86.94	83,71% to 89,73%	57.16
> 59.55	26.79	20,26% to 34,15%	86.94	83,71% to 89,73%	56.865
> 59.69	26.79	20,26% to 34,15%	87.13	83,92% to 89,91%	56.96
> 60.81	26.79	20,26% to 34,15%	87.33	84,14% to 90,08%	57.06
> 62.03	26.79	20,26% to 34,15%	87.52	84,35% to 90,26%	57.155
> 63.09	26.19	19,72% to 33,52%	87.52	84,35% to 90,26%	56.855
> 64.11	26.19	19,72% to 33,52%	87.72	84,56% to 90,43%	56.955
> 64.3	26.19	19,72% to 33,52%	87.91	84,78% to 90,61%	57.05
> 64.51	25.6	19,18% to 32,89%	87.91	84,78% to 90,61%	56.755
> 64.87	25.6	19,18% to 32,89%	88.11	84,99% to 90,78%	56.855
> 65.23	25.6	19,18% to 32,89%	88.3	85,2% to 90,96%	56.95
> 65.55	25	18,65% to 32,25%	88.3	85,2% to 90,96%	56.65
> 65.87	25	18,65% to 32,25%	88.5	85,42% to 91,13%	56.75
> 66.18	25	18,65% to 32,25%	88.69	85,63% to 91,3%	56.845
> 66.37	24.4	18,12% to 31,62%	88.69	85,63% to 91,3%	56.545
> 66.76	24.4	18,12% to 31,62%	88.89	85,84% to 91,48%	56.645
> 67.47	24.4	18,12% to 31,62%	89.08	86,06% to 91,65%	56.74
> 67.99	24.4	18,12% to 31,62%	89.28	86,27% to 91,82%	56.84
> 68.27	23.81	17,59% to 30,98%	89.28	86,27% to 91,82%	56.545
> 68.61	23.81	17,59% to 30,98%	89.47	86,49% to 91,99%	56.64
> 69.35	23.21	17,06% to 30,34%	89.47	86,49% to 91,99%	56.34
> 70.07	23.21	17,06% to 30,34%	89.67	86,7% to 92,16%	56.44
> 70.57	23.21	17,06% to 30,34%	89.86	86,92% to 92,34%	56.535
> 71.09	23.21	17,06% to 30,34%	90.06	87,14% to 92,51%	56.635
> 71.91	23.21	17,06% to 30,34%	90.25	87,35% to 92,68%	56.73
> 72.93	22.62	16,53% to 29,7%	90.25	87,35% to 92,68%	56.435
> 73.42	22.02	16,01% to 29,06%	90.25	87,35% to 92,68%	56.135
> 73.7	22.02	16,01% to 29,06%	90.45	87,57% to 92,85%	56.235
> 73.98	22.02	16,01% to 29,06%	90.64	87,79% to 93,02%	56.33
> 74.05	21.43	15,48% to 28,41%	90.64	87,79% to 93,02%	56.035
> 74.15	21.43	15,48% to 28,41%	90.84	88% to 93,19%	56.135
> 75.5	21.43	15,48% to 28,41%	91.03	88,22% to 93,36%	56.23
> 77.18	20.83	14,96% to 27,76%	91.03	88,22% to 93,36%	55.93
> 78.34	20.83	14,96% to 27,76%	91.23	88,44% to 93,53%	56.03
> 79.12	20.83	14,96% to 27,76%	91.42	88,66% to 93,7%	56.125
> 79.15	20.24	14,44% to 27,12%	91.42	88,66% to 93,7%	55.83
> 79.29	19.64	13,92% to 26,46%	91.42	88,66% to 93,7%	55.53
> 79.59	19.64	13,92% to 26,46%	91.62	88,88% to 93,87%	55.63
> 80.45	19.05	13,41% to 25,81%	91.62	88,88% to 93,87%	55.335
> 81.72	18.45	12,9% to 25,16%	91.62	88,88% to 93,87%	55.035
> 83.53	18.45	12,9% to 25,16%	91.81	89,09% to 94,04%	55.13
> 84.75	18.45	12,9% to 25,16%	92.01	89,31% to 94,2%	55.23
> 86.05	18.45	12,9% to 25,16%	92.2	89,53% to 94,37%	55.325
> 87.46	18.45	12,9% to 25,16%	92.4	89,75% to 94,54%	55.425
> 89.2	17.86	12,38% to 24,5%	92.4	89,75% to 94,54%	55.13
> 91.3	17.26	11,88% to 23,84%	92.4	89,75% to 94,54%	54.83
> 92.5	17.26	11,88% to 23,84%	92.59	89,97% to 94,71%	54.925
> 94.95	16.67	11,37% to 23,18%	92.59	89,97% to 94,71%	54.63
> 97.53	16.67	11,37% to 23,18%	92.79	90,2% to 94,87%	54.73
> 99.17	16.67	11,37% to 23,18%	92.98	90,42% to 95,04%	54.825
> 100.2	16.67	11,37% to 23,18%	93.18	90,64% to 95,2%	54.925
> 100.4	16.07	10,87% to 22,51%	93.18	90,64% to 95,2%	54.625
> 100.8	16.07	10,87% to 22,51%	93.37	90,86% to 95,37%	54.72
> 101.2	16.07	10,87% to 22,51%	93.57	91,08% to 95,53%	54.82
> 101.4	15.48	10,37% to 21,85%	93.57	91,08% to 95,53%	54.525
> 101.8	14.88	9,868% to 21,18%	93.57	91,08% to 95,53%	54.225
> 102.8	14.88	9,868% to 21,18%	93.76	91,31% to 95,69%	54.32
> 103.9	14.88	9,868% to 21,18%	93.96	91,53% to 95,86%	54.42
> 106.3	14.88	9,868% to 21,18%	94.15	91,76% to 96,02%	54.515
> 109	14.29	9,373% to 20,51%	94.15	91,76% to 96,02%	54.22
> 110.5	14.29	9,373% to 20,51%	94.35	91,98% to 96,18%	54.32
> 111.5	13.69	8,881% to 19,83%	94.35	91,98% to 96,18%	54.02
> 111.9	13.1	8,392% to 19,15%	94.35	91,98% to 96,18%	53.725
> 112.1	13.1	8,392% to 19,15%	94.54	92,21% to 96,34%	53.82
> 113.5	13.1	8,392% to 19,15%	94.74	92,43% to 96,5%	53.92
> 115.6	13.1	8,392% to 19,15%	94.93	92,66% to 96,66%	54.015
> 116.9	13.1	8,392% to 19,15%	95.13	92,89% to 96,82%	54.115
> 117.4	12.5	7,907% to 18,47%	95.13	92,89% to 96,82%	53.815
> 117.6	12.5	7,907% to 18,47%	95.32	93,12% to 96,98%	53.91
> 120	12.5	7,907% to 18,47%	95.52	93,35% to 97,14%	54.01
> 123.3	11.9	7,426% to 17,79%	95.52	93,35% to 97,14%	53.71
> 124.8	11.9	7,426% to 17,79%	95.71	93,58% to 97,29%	53.805
> 125.3	11.9	7,426% to 17,79%	95.91	93,81% to 97,45%	53.905
> 125.5	11.9	7,426% to 17,79%	96.1	94,04% to 97,6%	54
> 126.6	11.31	6,948% to 17,1%	96.1	94,04% to 97,6%	53.705
> 129.1	11.31	6,948% to 17,1%	96.3	94,28% to 97,76%	53.805
> 131.2	11.31	6,948% to 17,1%	96.49	94,51% to 97,91%	53.9
> 132.4	11.31	6,948% to 17,1%	96.69	94,75% to 98,06%	54
> 134	10.71	6,475% to 16,4%	96.69	94,75% to 98,06%	53.7
> 136.9	10.71	6,475% to 16,4%	96.88	94,98% to 98,21%	53.795
> 139.8	10.12	6,006% to 15,71%	96.88	94,98% to 98,21%	53.5
> 141.9	9.524	5,542% to 15,01%	96.88	94,98% to 98,21%	53.202
> 145.4	8.929	5,084% to 14,3%	96.88	94,98% to 98,21%	52.9045
> 148.3	8.929	5,084% to 14,3%	97.08	95,22% to 98,35%	53.0045
> 149.3	8.929	5,084% to 14,3%	97.27	95,46% to 98,5%	53.0995
> 150.9	8.929	5,084% to 14,3%	97.47	95,71% to 98,64%	53.1995
> 153.9	8.333	4,631% to 13,59%	97.47	95,71% to 98,64%	52.9015
> 163.4	7.738	4,184% to 12,87%	97.47	95,71% to 98,64%	52.604
> 172.2	7.143	3,745% to 12,14%	97.47	95,71% to 98,64%	52.3065
> 174.1	7.143	3,745% to 12,14%	97.66	95,95% to 98,79%	52.4015
> 177.1	7.143	3,745% to 12,14%	97.86	96,2% to 98,92%	52.5015
> 179.8	7.143	3,745% to 12,14%	98.05	96,44% to 99,06%	52.5965
> 180.5	7.143	3,745% to 12,14%	98.25	96,7% to 99,19%	52.6965
> 183.2	7.143	3,745% to 12,14%	98.44	96,95% to 99,32%	52.7915
> 185.5	7.143	3,745% to 12,14%	98.64	97,21% to 99,45%	52.8915
> 189.7	7.143	3,745% to 12,14%	98.83	97,47% to 99,57%	52.9865
> 196.6	6.548	3,314% to 11,41%	98.83	97,47% to 99,57%	52.689
> 204.5	5.952	2,891% to 10,67%	98.83	97,47% to 99,57%	52.391
> 214.4	5.952	2,891% to 10,67%	99.03	97,74% to 99,68%	52.491
> 219.6	5.357	2,479% to 9,926%	99.03	97,74% to 99,68%	52.1935
> 232.3	5.357	2,479% to 9,926%	99.22	98,02% to 99,79%	52.2885
> 261.5	5.357	2,479% to 9,926%	99.42	98,3% to 99,88%	52.3885
> 283.1	4.762	2,078% to 9,167%	99.42	98,3% to 99,88%	52.091
> 288.5	4.762	2,078% to 9,167%	99.61	98,6% to 99,95%	52.186
> 289.9	4.167	1,691% to 8,396%	99.61	98,6% to 99,95%	51.8885
> 290.8	4.167	1,691% to 8,396%	99.81	98,92% to 100%	51.9885
> 300.1	3.571	1,322% to 7,611%	99.81	98,92% to 100%	51.6905
> 312.1	2.976	0,9733% to 6,808%	99.81	98,92% to 100%	51.393
> 315.2	2.381	0,6525% to 5,984%	99.81	98,92% to 100%	51.0955
> 318.2	1.786	0,3698% to 5,13%	99.81	98,92% to 100%	50.798
> 327.7	1.19	0,1445% to 4,234%	99.81	98,92% to 100%	50.5
> 339.2	0.5952	0,01507% to 3,272%	99.81	98,92% to 100%	50.2026
> 344.5	0	0% to 2,172%	99.81	98,92% to 100%	49.905

## Sheet: DGP (TG2-) IgA
Cut off	Sensitivity%	95% CI	Specificity%	95% CI	Accuracy%
> 0.195	68.45	60,85% to 75,39%	33.72	29,64% to 38%	51.085
> 0.4	68.45	60,85% to 75,39%	33.92	29,83% to 38,2%	51.185
> 0.415	68.45	60,85% to 75,39%	34.11	30,01% to 38,4%	51.28
> 0.49	68.45	60,85% to 75,39%	34.31	30,2% to 38,59%	51.38
> 0.575	68.45	60,85% to 75,39%	34.5	30,39% to 38,79%	51.475
> 0.595	68.45	60,85% to 75,39%	34.7	30,58% to 38,99%	51.575
> 0.61	67.86	60,23% to 74,84%	34.7	30,58% to 38,99%	51.28
> 0.645	67.86	60,23% to 74,84%	34.89	30,77% to 39,19%	51.375
> 0.675	67.86	60,23% to 74,84%	35.09	30,96% to 39,39%	51.475
> 0.695	67.86	60,23% to 74,84%	35.48	31,33% to 39,79%	51.67
> 0.74	67.86	60,23% to 74,84%	35.67	31,52% to 39,99%	51.765
> 0.775	67.86	60,23% to 74,84%	35.87	31,71% to 40,19%	51.865
> 0.785	67.86	60,23% to 74,84%	36.06	31,9% to 40,39%	51.96
> 0.795	67.86	60,23% to 74,84%	36.26	32,09% to 40,58%	52.06
> 0.81	67.86	60,23% to 74,84%	36.45	32,28% to 40,78%	52.155
> 0.83	67.86	60,23% to 74,84%	36.65	32,47% to 40,98%	52.255
> 0.855	67.86	60,23% to 74,84%	37.23	33,04% to 41,58%	52.545
> 0.875	67.86	60,23% to 74,84%	37.43	33,22% to 41,77%	52.645
> 0.89	67.86	60,23% to 74,84%	37.62	33,41% to 41,97%	52.74
> 0.905	67.26	59,61% to 74,29%	37.62	33,41% to 41,97%	52.44
> 0.92	67.26	59,61% to 74,29%	37.82	33,6% to 42,17%	52.54
> 0.935	67.26	59,61% to 74,29%	38.01	33,79% to 42,37%	52.635
> 0.945	67.26	59,61% to 74,29%	38.21	33,98% to 42,57%	52.735
> 0.955	67.26	59,61% to 74,29%	38.4	34,17% to 42,76%	52.83
> 0.97	67.26	59,61% to 74,29%	38.79	34,55% to 43,16%	53.025
> 0.99	67.26	59,61% to 74,29%	38.99	34,74% to 43,36%	53.125
> 1.005	67.26	59,61% to 74,29%	39.18	34,93% to 43,56%	53.22
> 1.015	67.26	59,61% to 74,29%	39.77	35,5% to 44,15%	53.515
> 1.025	67.26	59,61% to 74,29%	40.35	36,07% to 44,74%	53.805
> 1.035	67.26	59,61% to 74,29%	40.55	36,26% to 44,94%	53.905
> 1.045	67.26	59,61% to 74,29%	40.94	36,65% to 45,33%	54.1
> 1.08	66.67	58,99% to 73,74%	40.94	36,65% to 45,33%	53.805
> 1.115	66.67	58,99% to 73,74%	41.52	37,22% to 45,92%	54.095
> 1.13	65.48	57,76% to 72,63%	41.91	37,6% to 46,31%	53.695
> 1.15	64.88	57,15% to 72,07%	41.91	37,6% to 46,31%	53.395
> 1.17	64.29	56,54% to 71,52%	41.91	37,6% to 46,31%	53.1
> 1.205	64.29	56,54% to 71,52%	42.11	37,79% to 46,51%	53.2
> 1.245	64.29	56,54% to 71,52%	42.3	37,98% to 46,71%	53.295
> 1.265	64.29	56,54% to 71,52%	42.5	38,17% to 46,9%	53.395
> 1.275	63.69	55,93% to 70,96%	42.5	38,17% to 46,9%	53.095
> 1.295	63.69	55,93% to 70,96%	42.69	38,37% to 47,1%	53.19
> 1.315	63.69	55,93% to 70,96%	43.08	38,75% to 47,49%	53.385
> 1.325	63.69	55,93% to 70,96%	43.47	39,13% to 47,88%	53.58
> 1.35	63.69	55,93% to 70,96%	44.05	39,71% to 48,47%	53.87
> 1.385	63.69	55,93% to 70,96%	44.44	40,09% to 48,86%	54.065
> 1.405	63.69	55,93% to 70,96%	44.64	40,28% to 49,06%	54.165
> 1.415	63.69	55,93% to 70,96%	44.83	40,47% to 49,25%	54.26
> 1.435	63.69	55,93% to 70,96%	45.03	40,67% to 49,45%	54.36
> 1.455	63.1	55,32% to 70,4%	45.03	40,67% to 49,45%	54.065
> 1.485	63.1	55,32% to 70,4%	45.22	40,86% to 49,65%	54.16
> 1.54	62.5	54,71% to 69,84%	45.22	40,86% to 49,65%	53.86
> 1.575	62.5	54,71% to 69,84%	45.42	41,05% to 49,84%	53.96
> 1.585	62.5	54,71% to 69,84%	45.61	41,24% to 50,04%	54.055
> 1.6	62.5	54,71% to 69,84%	45.81	41,43% to 50,23%	54.155
> 1.62	62.5	54,71% to 69,84%	46	41,63% to 50,43%	54.25
> 1.635	61.9	54,11% to 69,28%	46.2	41,82% to 50,62%	54.05
> 1.645	61.31	53,5% to 68,71%	46.39	42,01% to 50,82%	53.85
> 1.655	60.12	52,29% to 67,58%	46.39	42,01% to 50,82%	53.255
> 1.665	60.12	52,29% to 67,58%	46.98	42,59% to 51,4%	53.55
> 1.68	60.12	52,29% to 67,58%	47.17	42,78% to 51,6%	53.645
> 1.695	60.12	52,29% to 67,58%	47.37	42,98% to 51,79%	53.745
> 1.71	60.12	52,29% to 67,58%	47.56	43,17% to 51,99%	53.84
> 1.74	60.12	52,29% to 67,58%	47.76	43,36% to 52,18%	53.94
> 1.77	60.12	52,29% to 67,58%	47.95	43,56% to 52,37%	54.035
> 1.785	59.52	51,69% to 67,02%	48.34	43,94% to 52,76%	53.93
> 1.795	59.52	51,69% to 67,02%	48.54	44,13% to 52,96%	54.03
> 1.805	59.52	51,69% to 67,02%	48.93	44,52% to 53,35%	54.225
> 1.815	58.93	51,09% to 66,45%	48.93	44,52% to 53,35%	53.93
> 1.825	58.93	51,09% to 66,45%	49.12	44,72% to 53,54%	54.025
> 1.85	58.93	51,09% to 66,45%	49.32	44,91% to 53,73%	54.125
> 1.905	58.93	51,09% to 66,45%	49.71	45,3% to 54,12%	54.32
> 1.96	58.93	51,09% to 66,45%	49.9	45,49% to 54,32%	54.415
> 1.99	58.33	50,49% to 65,88%	49.9	45,49% to 54,32%	54.115
> 2.02	58.33	50,49% to 65,88%	50.1	45,68% to 54,51%	54.215
> 2.045	58.33	50,49% to 65,88%	50.29	45,88% to 54,7%	54.31
> 2.065	58.33	50,49% to 65,88%	50.68	46,27% to 55,09%	54.505
> 2.085	58.33	50,49% to 65,88%	50.88	46,46% to 55,28%	54.605
> 2.095	58.33	50,49% to 65,88%	51.07	46,65% to 55,48%	54.7
> 2.11	58.33	50,49% to 65,88%	51.27	46,85% to 55,67%	54.8
> 2.14	58.33	50,49% to 65,88%	51.46	47,04% to 55,87%	54.895
> 2.165	58.33	50,49% to 65,88%	51.85	47,43% to 56,25%	55.09
> 2.175	58.33	50,49% to 65,88%	52.05	47,63% to 56,44%	55.19
> 2.185	58.33	50,49% to 65,88%	52.24	47,82% to 56,64%	55.285
> 2.195	58.33	50,49% to 65,88%	52.44	48,01% to 56,83%	55.385
> 2.21	58.33	50,49% to 65,88%	52.63	48,21% to 57,02%	55.48
> 2.265	58.33	50,49% to 65,88%	53.02	48,6% to 57,41%	55.675
> 2.315	58.33	50,49% to 65,88%	53.22	48,79% to 57,6%	55.775
> 2.34	58.33	50,49% to 65,88%	53.41	48,99% to 57,79%	55.87
> 2.365	57.14	49,29% to 64,74%	53.41	48,99% to 57,79%	55.275
> 2.375	56.55	48,7% to 64,16%	53.41	48,99% to 57,79%	54.98
> 2.4	56.55	48,7% to 64,16%	53.61	49,18% to 57,99%	55.08
> 2.425	55.95	48,1% to 63,59%	53.8	49,38% to 58,18%	54.875
> 2.435	55.36	47,5% to 63,02%	54	49,57% to 58,37%	54.68
> 2.45	54.76	46,91% to 62,44%	54.39	49,96% to 58,76%	54.575
> 2.5	54.17	46,32% to 61,86%	54.39	49,96% to 58,76%	54.28
> 2.545	54.17	46,32% to 61,86%	54.78	50,35% to 59,14%	54.475
> 2.57	54.17	46,32% to 61,86%	54.97	50,55% to 59,33%	54.57
> 2.595	54.17	46,32% to 61,86%	55.36	50,94% to 59,72%	54.765
> 2.615	54.17	46,32% to 61,86%	55.56	51,14% to 59,91%	54.865
> 2.635	54.17	46,32% to 61,86%	55.75	51,33% to 60,1%	54.96
> 2.655	54.17	46,32% to 61,86%	55.95	51,53% to 60,29%	55.06
> 2.675	54.17	46,32% to 61,86%	56.14	51,72% to 60,49%	55.155
> 2.7	54.17	46,32% to 61,86%	56.34	51,92% to 60,68%	55.255
> 2.73	54.17	46,32% to 61,86%	56.53	52,12% to 60,87%	55.35
> 2.755	54.17	46,32% to 61,86%	56.73	52,31% to 61,06%	55.45
> 2.79	54.17	46,32% to 61,86%	56.92	52,51% to 61,25%	55.545
> 2.845	54.17	46,32% to 61,86%	57.12	52,7% to 61,44%	55.645
> 2.89	54.17	46,32% to 61,86%	57.7	53,29% to 62,02%	55.935
> 2.945	53.57	45,73% to 61,29%	57.7	53,29% to 62,02%	55.635
> 2.995	53.57	45,73% to 61,29%	57.89	53,49% to 62,21%	55.73
> 3.005	53.57	45,73% to 61,29%	58.09	53,69% to 62,4%	55.83
> 3.04	53.57	45,73% to 61,29%	58.28	53,88% to 62,59%	55.925
> 3.075	53.57	45,73% to 61,29%	58.48	54,08% to 62,78%	56.025
> 3.085	53.57	45,73% to 61,29%	58.67	54,28% to 62,97%	56.12
> 3.095	53.57	45,73% to 61,29%	58.87	54,47% to 63,16%	56.22
> 3.105	53.57	45,73% to 61,29%	59.06	54,67% to 63,35%	56.315
> 3.13	53.57	45,73% to 61,29%	59.26	54,87% to 63,54%	56.415
> 3.155	53.57	45,73% to 61,29%	59.45	55,06% to 63,74%	56.51
> 3.2	53.57	45,73% to 61,29%	59.65	55,26% to 63,93%	56.61
> 3.25	52.98	45,14% to 60,71%	59.84	55,46% to 64,12%	56.41
> 3.265	52.98	45,14% to 60,71%	60.04	55,66% to 64,31%	56.51
> 3.315	52.98	45,14% to 60,71%	60.43	56,05% to 64,69%	56.705
> 3.365	52.38	44,55% to 60,13%	60.43	56,05% to 64,69%	56.405
> 3.385	52.38	44,55% to 60,13%	60.82	56,44% to 65,07%	56.6
> 3.42	52.38	44,55% to 60,13%	61.01	56,64% to 65,26%	56.695
> 3.445	51.79	43,96% to 59,55%	61.01	56,64% to 65,26%	56.4
> 3.46	51.79	43,96% to 59,55%	61.4	57,04% to 65,64%	56.595
> 3.48	51.79	43,96% to 59,55%	61.6	57,24% to 65,83%	56.695
> 3.505	51.79	43,96% to 59,55%	61.79	57,43% to 66,02%	56.79
> 3.54	51.19	43,37% to 58,97%	61.79	57,43% to 66,02%	56.49
> 3.575	51.19	43,37% to 58,97%	61.99	57,63% to 66,21%	56.59
> 3.61	51.19	43,37% to 58,97%	62.18	57,83% to 66,4%	56.685
> 3.655	51.19	43,37% to 58,97%	62.38	58,03% to 66,59%	56.785
> 3.69	51.19	43,37% to 58,97%	62.57	58,23% to 66,78%	56.88
> 3.71	50.6	42,79% to 58,38%	62.77	58,42% to 66,96%	56.685
> 3.78	50.6	42,79% to 58,38%	62.96	58,62% to 67,15%	56.78
> 3.855	50.6	42,79% to 58,38%	63.16	58,82% to 67,34%	56.88
> 3.88	50.6	42,79% to 58,38%	63.35	59,02% to 67,53%	56.975
> 3.905	50	42,2% to 57,8%	63.94	59,61% to 68,1%	56.97
> 3.95	50	42,2% to 57,8%	64.13	59,81% to 68,29%	57.065
> 3.99	50	42,2% to 57,8%	64.33	60,01% to 68,48%	57.165
> 4.04	49.4	41,62% to 57,21%	64.33	60,01% to 68,48%	56.865
> 4.14	49.4	41,62% to 57,21%	64.52	60,21% to 68,67%	56.96
> 4.24	48.81	41,03% to 56,63%	64.91	60,61% to 69,04%	56.86
> 4.31	48.21	40,45% to 56,04%	65.11	60,81% to 69,23%	56.66
> 4.365	47.62	39,87% to 55,45%	65.11	60,81% to 69,23%	56.365
> 4.4	47.62	39,87% to 55,45%	65.3	61,01% to 69,42%	56.46
> 4.42	47.62	39,87% to 55,45%	65.5	61,21% to 69,61%	56.56
> 4.445	47.62	39,87% to 55,45%	65.69	61,41% to 69,8%	56.655
> 4.47	47.62	39,87% to 55,45%	65.89	61,6% to 69,99%	56.755
> 4.49	47.62	39,87% to 55,45%	66.08	61,8% to 70,17%	56.85
> 4.505	47.62	39,87% to 55,45%	66.28	62% to 70,36%	56.95
> 4.525	47.62	39,87% to 55,45%	66.47	62,2% to 70,55%	57.045
> 4.545	47.62	39,87% to 55,45%	66.67	62,4% to 70,74%	57.145
> 4.565	47.62	39,87% to 55,45%	66.86	62,6% to 70,93%	57.24
> 4.615	47.62	39,87% to 55,45%	67.06	62,8% to 71,11%	57.34
> 4.655	46.43	38,71% to 54,27%	67.25	63% to 71,3%	56.84
> 4.73	46.43	38,71% to 54,27%	67.45	63,2% to 71,49%	56.94
> 4.81	46.43	38,71% to 54,27%	67.84	63,6% to 71,86%	57.135
> 4.855	46.43	38,71% to 54,27%	68.03	63,8% to 72,05%	57.23
> 4.895	46.43	38,71% to 54,27%	68.23	64% to 72,24%	57.33
> 4.94	46.43	38,71% to 54,27%	68.42	64,2% to 72,42%	57.425
> 5.005	46.43	38,71% to 54,27%	68.62	64,4% to 72,61%	57.525
> 5.075	45.83	38,14% to 53,68%	68.81	64,6% to 72,8%	57.32
> 5.125	45.83	38,14% to 53,68%	69.2	65,01% to 73,17%	57.515
> 5.14	45.24	37,56% to 53,09%	69.2	65,01% to 73,17%	57.22
> 5.175	45.24	37,56% to 53,09%	69.4	65,21% to 73,36%	57.32
> 5.225	44.64	36,98% to 52,5%	69.4	65,21% to 73,36%	57.02
> 5.31	44.64	36,98% to 52,5%	69.59	65,41% to 73,55%	57.115
> 5.4	44.64	36,98% to 52,5%	69.79	65,61% to 73,73%	57.215
> 5.46	44.64	36,98% to 52,5%	69.98	65,81% to 73,92%	57.31
> 5.525	44.64	36,98% to 52,5%	70.18	66,01% to 74,11%	57.41
> 5.57	44.05	36,41% to 51,9%	70.18	66,01% to 74,11%	57.115
> 5.595	44.05	36,41% to 51,9%	70.37	66,21% to 74,29%	57.21
> 5.635	44.05	36,41% to 51,9%	70.57	66,41% to 74,48%	57.31
> 5.685	43.45	35,84% to 51,3%	70.57	66,41% to 74,48%	57.01
> 5.715	43.45	35,84% to 51,3%	70.76	66,61% to 74,66%	57.105
> 5.73	43.45	35,84% to 51,3%	70.96	66,82% to 74,85%	57.205
> 5.795	43.45	35,84% to 51,3%	71.15	67,02% to 75,04%	57.3
> 5.89	42.86	35,26% to 50,71%	71.15	67,02% to 75,04%	57.005
> 5.94	42.86	35,26% to 50,71%	71.35	67,22% to 75,22%	57.105
> 6.075	42.86	35,26% to 50,71%	71.54	67,42% to 75,41%	57.2
> 6.22	42.26	34,69% to 50,11%	71.54	67,42% to 75,41%	56.9
> 6.28	42.26	34,69% to 50,11%	71.73	67,62% to 75,59%	56.995
> 6.395	42.26	34,69% to 50,11%	71.93	67,83% to 75,78%	57.095
> 6.475	42.26	34,69% to 50,11%	72.12	68,03% to 75,97%	57.19
> 6.485	42.26	34,69% to 50,11%	72.32	68,23% to 76,15%	57.29
> 6.55	42.26	34,69% to 50,11%	72.51	68,43% to 76,34%	57.385
> 6.625	41.67	34,12% to 49,51%	72.51	68,43% to 76,34%	57.09
> 6.66	41.67	34,12% to 49,51%	72.71	68,63% to 76,52%	57.19
> 6.765	41.67	34,12% to 49,51%	72.9	68,84% to 76,71%	57.285
> 6.87	41.67	34,12% to 49,51%	73.1	69,04% to 76,89%	57.385
> 6.93	41.67	34,12% to 49,51%	73.29	69,24% to 77,08%	57.48
> 6.985	41.67	34,12% to 49,51%	73.49	69,44% to 77,26%	57.58
> 7.01	41.67	34,12% to 49,51%	73.68	69,65% to 77,45%	57.675
> 7.13	41.67	34,12% to 49,51%	73.88	69,85% to 77,63%	57.775
> 7.26	41.07	33,55% to 48,91%	73.88	69,85% to 77,63%	57.475
> 7.29	41.07	33,55% to 48,91%	74.07	70,05% to 77,82%	57.57
> 7.34	40.48	32,98% to 48,31%	74.07	70,05% to 77,82%	57.275
> 7.39	40.48	32,98% to 48,31%	74.27	70,26% to 78%	57.375
> 7.45	40.48	32,98% to 48,31%	74.46	70,46% to 78,18%	57.47
> 7.535	40.48	32,98% to 48,31%	74.66	70,66% to 78,37%	57.57
> 7.585	40.48	32,98% to 48,31%	74.85	70,87% to 78,55%	57.665
> 7.66	40.48	32,98% to 48,31%	75.05	71,07% to 78,74%	57.765
> 7.78	39.88	32,42% to 47,71%	75.05	71,07% to 78,74%	57.465
> 7.85	39.88	32,42% to 47,71%	75.24	71,27% to 78,92%	57.56
> 7.865	39.88	32,42% to 47,71%	75.44	71,48% to 79,11%	57.66
> 7.91	39.88	32,42% to 47,71%	75.63	71,68% to 79,29%	57.755
> 7.965	39.88	32,42% to 47,71%	75.83	71,88% to 79,47%	57.855
> 8	39.88	32,42% to 47,71%	76.02	72,09% to 79,66%	57.95
> 8.03	39.88	32,42% to 47,71%	76.22	72,29% to 79,84%	58.05
> 8.21	39.29	31,85% to 47,1%	76.22	72,29% to 79,84%	57.755
> 8.405	39.29	31,85% to 47,1%	76.41	72,5% to 80,02%	57.85
> 8.44	39.29	31,85% to 47,1%	76.8	72,9% to 80,39%	58.045
> 8.475	38.69	31,29% to 46,5%	76.8	72,9% to 80,39%	57.745
> 8.535	38.69	31,29% to 46,5%	77	73,11% to 80,57%	57.845
> 8.58	38.69	31,29% to 46,5%	77.19	73,31% to 80,76%	57.94
> 8.7	38.69	31,29% to 46,5%	77.39	73,52% to 80,94%	58.04
> 8.82	38.1	30,72% to 45,89%	77.39	73,52% to 80,94%	57.745
> 8.905	37.5	30,16% to 45,29%	77.39	73,52% to 80,94%	57.445
> 9.09	36.9	29,6% to 44,68%	77.39	73,52% to 80,94%	57.145
> 9.22	36.9	29,6% to 44,68%	77.58	73,72% to 81,12%	57.24
> 9.325	36.31	29,04% to 44,07%	77.58	73,72% to 81,12%	56.945
> 9.45	36.31	29,04% to 44,07%	77.78	73,93% to 81,3%	57.045
> 9.525	35.71	28,48% to 43,46%	77.78	73,93% to 81,3%	56.745
> 9.57	35.71	28,48% to 43,46%	77.97	74,13% to 81,49%	56.84
> 9.72	35.71	28,48% to 43,46%	78.17	74,34% to 81,67%	56.94
> 9.87	35.12	27,93% to 42,85%	78.17	74,34% to 81,67%	56.645
> 9.89	35.12	27,93% to 42,85%	78.36	74,54% to 81,85%	56.74
> 9.925	35.12	27,93% to 42,85%	78.56	74,75% to 82,03%	56.84
> 9.97	35.12	27,93% to 42,85%	78.75	74,95% to 82,22%	56.935
> 10.1	34.52	27,37% to 42,24%	78.75	74,95% to 82,22%	56.635
> 10.27	34.52	27,37% to 42,24%	78.95	75,16% to 82,4%	56.735
> 10.35	34.52	27,37% to 42,24%	79.14	75,37% to 82,58%	56.83
> 10.44	33.93	26,81% to 41,62%	79.14	75,37% to 82,58%	56.535
> 10.52	33.93	26,81% to 41,62%	79.34	75,57% to 82,76%	56.635
> 10.64	33.33	26,26% to 41,01%	79.34	75,57% to 82,76%	56.335
> 10.84	32.74	25,71% to 40,39%	79.34	75,57% to 82,76%	56.04
> 10.96	32.74	25,71% to 40,39%	79.53	75,78% to 82,94%	56.135
> 11.02	32.74	25,71% to 40,39%	79.73	75,98% to 83,12%	56.235
> 11.06	32.74	25,71% to 40,39%	80.12	76,4% to 83,49%	56.43
> 11.31	32.74	25,71% to 40,39%	80.51	76,81% to 83,85%	56.625
> 11.61	32.74	25,71% to 40,39%	80.7	77,02% to 84,03%	56.72
> 11.84	32.74	25,71% to 40,39%	80.9	77,22% to 84,21%	56.82
> 12.21	32.14	25,16% to 39,77%	80.9	77,22% to 84,21%	56.52
> 12.5	31.55	24,61% to 39,15%	80.9	77,22% to 84,21%	56.225
> 12.59	31.55	24,61% to 39,15%	81.09	77,43% to 84,39%	56.32
> 12.67	30.95	24,06% to 38,53%	81.09	77,43% to 84,39%	56.02
> 12.74	30.95	24,06% to 38,53%	81.29	77,64% to 84,57%	56.12
> 12.82	30.36	23,51% to 37,91%	81.29	77,64% to 84,57%	55.825
> 12.95	30.36	23,51% to 37,91%	81.48	77,84% to 84,75%	55.92
> 13.13	29.17	22,42% to 36,66%	81.48	77,84% to 84,75%	55.325
> 13.26	28.57	21,88% to 36,04%	81.48	77,84% to 84,75%	55.025
> 13.27	28.57	21,88% to 36,04%	81.68	78,05% to 84,93%	55.125
> 13.31	28.57	21,88% to 36,04%	81.87	78,26% to 85,11%	55.22
> 13.56	28.57	21,88% to 36,04%	82.07	78,47% to 85,29%	55.32
> 13.85	28.57	21,88% to 36,04%	82.26	78,68% to 85,47%	55.415
> 14.13	28.57	21,88% to 36,04%	82.46	78,88% to 85,65%	55.515
> 14.44	28.57	21,88% to 36,04%	82.65	79,09% to 85,83%	55.61
> 14.61	27.98	21,34% to 35,41%	82.65	79,09% to 85,83%	55.315
> 14.78	27.98	21,34% to 35,41%	82.85	79,3% to 86,01%	55.415
> 15.01	27.98	21,34% to 35,41%	83.04	79,51% to 86,19%	55.51
> 15.13	27.38	20,8% to 34,78%	83.04	79,51% to 86,19%	55.21
> 15.23	27.38	20,8% to 34,78%	83.24	79,72% to 86,37%	55.31
> 15.33	27.38	20,8% to 34,78%	83.43	79,93% to 86,55%	55.405
> 15.42	27.38	20,8% to 34,78%	83.63	80,13% to 86,72%	55.505
> 15.55	27.38	20,8% to 34,78%	83.82	80,34% to 86,9%	55.6
> 15.68	27.38	20,8% to 34,78%	84.02	80,55% to 87,08%	55.7
> 15.84	27.38	20,8% to 34,78%	84.21	80,76% to 87,26%	55.795
> 16.04	27.38	20,8% to 34,78%	84.41	80,97% to 87,44%	55.895
> 16.2	27.38	20,8% to 34,78%	84.6	81,18% to 87,61%	55.99
> 16.48	27.38	20,8% to 34,78%	84.8	81,39% to 87,79%	56.09
> 16.85	26.79	20,26% to 34,15%	84.8	81,39% to 87,79%	55.795
> 17.07	26.79	20,26% to 34,15%	84.99	81,6% to 87,97%	55.89
> 17.17	26.79	20,26% to 34,15%	85.19	81,81% to 88,15%	55.99
> 17.22	26.19	19,72% to 33,52%	85.19	81,81% to 88,15%	55.69
> 17.46	25.6	19,18% to 32,89%	85.38	82,02% to 88,32%	55.49
> 17.8	25	18,65% to 32,25%	85.38	82,02% to 88,32%	55.19
> 18.05	25	18,65% to 32,25%	85.58	82,23% to 88,5%	55.29
> 18.3	25	18,65% to 32,25%	85.96	82,65% to 88,85%	55.48
> 18.46	25	18,65% to 32,25%	86.16	82,87% to 89,03%	55.58
> 18.51	25	18,65% to 32,25%	86.35	83,08% to 89,21%	55.675
> 18.58	24.4	18,12% to 31,62%	86.35	83,08% to 89,21%	55.375
> 18.65	24.4	18,12% to 31,62%	86.55	83,29% to 89,38%	55.475
> 18.69	24.4	18,12% to 31,62%	86.74	83,5% to 89,56%	55.57
> 18.74	24.4	18,12% to 31,62%	86.94	83,71% to 89,73%	55.67
> 18.89	24.4	18,12% to 31,62%	87.13	83,92% to 89,91%	55.765
> 19.03	23.81	17,59% to 30,98%	87.13	83,92% to 89,91%	55.47
> 19.43	23.81	17,59% to 30,98%	87.33	84,14% to 90,08%	55.57
> 19.99	23.81	17,59% to 30,98%	87.52	84,35% to 90,26%	55.665
> 20.27	23.81	17,59% to 30,98%	87.72	84,56% to 90,43%	55.765
> 20.67	23.81	17,59% to 30,98%	87.91	84,78% to 90,61%	55.86
> 20.95	23.81	17,59% to 30,98%	88.11	84,99% to 90,78%	55.96
> 21	23.21	17,06% to 30,34%	88.11	84,99% to 90,78%	55.66
> 21.53	23.21	17,06% to 30,34%	88.3	85,2% to 90,96%	55.755
> 22.05	22.62	16,53% to 29,7%	88.3	85,2% to 90,96%	55.46
> 22.27	22.62	16,53% to 29,7%	88.5	85,42% to 91,13%	55.56
> 22.51	22.02	16,01% to 29,06%	88.5	85,42% to 91,13%	55.26
> 22.71	22.02	16,01% to 29,06%	88.69	85,63% to 91,3%	55.355
> 23.04	21.43	15,48% to 28,41%	88.69	85,63% to 91,3%	55.06
> 23.32	21.43	15,48% to 28,41%	88.89	85,84% to 91,48%	55.16
> 23.49	21.43	15,48% to 28,41%	89.08	86,06% to 91,65%	55.255
> 23.68	21.43	15,48% to 28,41%	89.28	86,27% to 91,82%	55.355
> 23.81	21.43	15,48% to 28,41%	89.47	86,49% to 91,99%	55.45
> 23.85	20.83	14,96% to 27,76%	89.47	86,49% to 91,99%	55.15
> 23.91	20.83	14,96% to 27,76%	89.67	86,7% to 92,16%	55.25
> 24.08	20.24	14,44% to 27,12%	89.67	86,7% to 92,16%	54.955
> 24.26	20.24	14,44% to 27,12%	89.86	86,92% to 92,34%	55.05
> 24.35	20.24	14,44% to 27,12%	90.06	87,14% to 92,51%	55.15
> 24.58	19.64	13,92% to 26,46%	90.06	87,14% to 92,51%	54.85
> 25.03	19.64	13,92% to 26,46%	90.25	87,35% to 92,68%	54.945
> 25.35	19.64	13,92% to 26,46%	90.45	87,57% to 92,85%	55.045
> 25.42	19.64	13,92% to 26,46%	90.64	87,79% to 93,02%	55.14
> 25.68	19.05	13,41% to 25,81%	90.64	87,79% to 93,02%	54.845
> 26.12	19.05	13,41% to 25,81%	90.84	88% to 93,19%	54.945
> 26.54	19.05	13,41% to 25,81%	91.03	88,22% to 93,36%	55.04
> 26.9	19.05	13,41% to 25,81%	91.23	88,44% to 93,53%	55.14
> 27.17	18.45	12,9% to 25,16%	91.23	88,44% to 93,53%	54.84
> 27.74	18.45	12,9% to 25,16%	91.42	88,66% to 93,7%	54.935
> 28.22	17.86	12,38% to 24,5%	91.42	88,66% to 93,7%	54.64
> 28.42	17.26	11,88% to 23,84%	91.42	88,66% to 93,7%	54.34
> 28.64	16.67	11,37% to 23,18%	91.42	88,66% to 93,7%	54.045
> 28.95	16.67	11,37% to 23,18%	91.62	88,88% to 93,87%	54.145
> 29.54	16.67	11,37% to 23,18%	91.81	89,09% to 94,04%	54.24
> 29.97	16.67	11,37% to 23,18%	92.01	89,31% to 94,2%	54.34
> 30.1	16.07	10,87% to 22,51%	92.01	89,31% to 94,2%	54.04
> 30.19	16.07	10,87% to 22,51%	92.2	89,53% to 94,37%	54.135
> 30.33	16.07	10,87% to 22,51%	92.4	89,75% to 94,54%	54.235
> 30.77	16.07	10,87% to 22,51%	92.59	89,97% to 94,71%	54.33
> 31.6	16.07	10,87% to 22,51%	92.79	90,2% to 94,87%	54.43
> 32.09	16.07	10,87% to 22,51%	92.98	90,42% to 95,04%	54.525
> 32.14	15.48	10,37% to 21,85%	92.98	90,42% to 95,04%	54.23
> 32.49	15.48	10,37% to 21,85%	93.18	90,64% to 95,2%	54.33
> 32.92	14.88	9,868% to 21,18%	93.18	90,64% to 95,2%	54.03
> 33.07	14.29	9,373% to 20,51%	93.18	90,64% to 95,2%	53.735
> 33.28	14.29	9,373% to 20,51%	93.37	90,86% to 95,37%	53.83
> 33.91	14.29	9,373% to 20,51%	93.57	91,08% to 95,53%	53.93
> 34.61	14.29	9,373% to 20,51%	93.76	91,31% to 95,69%	54.025
> 34.94	13.69	8,881% to 19,83%	93.76	91,31% to 95,69%	53.725
> 35.18	13.69	8,881% to 19,83%	93.96	91,53% to 95,86%	53.825
> 35.34	13.69	8,881% to 19,83%	94.15	91,76% to 96,02%	53.92
> 35.56	13.69	8,881% to 19,83%	94.35	91,98% to 96,18%	54.02
> 36.01	13.69	8,881% to 19,83%	94.54	92,21% to 96,34%	54.115
> 36.3	13.1	8,392% to 19,15%	94.54	92,21% to 96,34%	53.82
> 36.52	12.5	7,907% to 18,47%	94.54	92,21% to 96,34%	53.52
> 36.85	12.5	7,907% to 18,47%	94.74	92,43% to 96,5%	53.62
> 37.22	12.5	7,907% to 18,47%	94.93	92,66% to 96,66%	53.715
> 37.62	12.5	7,907% to 18,47%	95.13	92,89% to 96,82%	53.815
> 37.93	11.9	7,426% to 17,79%	95.13	92,89% to 96,82%	53.515
> 38.76	11.31	6,948% to 17,1%	95.13	92,89% to 96,82%	53.22
> 39.6	11.31	6,948% to 17,1%	95.32	93,12% to 96,98%	53.315
> 39.76	10.71	6,475% to 16,4%	95.32	93,12% to 96,98%	53.015
> 39.86	10.12	6,006% to 15,71%	95.32	93,12% to 96,98%	52.72
> 40	9.524	5,542% to 15,01%	95.32	93,12% to 96,98%	52.422
> 41.06	9.524	5,542% to 15,01%	95.52	93,35% to 97,14%	52.522
> 42.5	9.524	5,542% to 15,01%	95.71	93,58% to 97,29%	52.617
> 43.21	9.524	5,542% to 15,01%	95.91	93,81% to 97,45%	52.717
> 43.62	9.524	5,542% to 15,01%	96.1	94,04% to 97,6%	52.812
> 43.88	9.524	5,542% to 15,01%	96.3	94,28% to 97,76%	52.912
> 44.01	9.524	5,542% to 15,01%	96.49	94,51% to 97,91%	53.007
> 46.11	9.524	5,542% to 15,01%	96.69	94,75% to 98,06%	53.107
> 48.46	8.929	5,084% to 14,3%	96.69	94,75% to 98,06%	52.8095
> 49.17	8.929	5,084% to 14,3%	96.88	94,98% to 98,21%	52.9045
> 50.96	8.929	5,084% to 14,3%	97.08	95,22% to 98,35%	53.0045
> 52.3	8.333	4,631% to 13,59%	97.08	95,22% to 98,35%	52.7065
> 52.63	7.738	4,184% to 12,87%	97.08	95,22% to 98,35%	52.409
> 53.34	7.738	4,184% to 12,87%	97.27	95,46% to 98,5%	52.504
> 56.39	7.738	4,184% to 12,87%	97.47	95,71% to 98,64%	52.604
> 59.2	7.143	3,745% to 12,14%	97.47	95,71% to 98,64%	52.3065
> 60.85	7.143	3,745% to 12,14%	97.66	95,95% to 98,79%	52.4015
> 62.41	7.143	3,745% to 12,14%	97.86	96,2% to 98,92%	52.5015
> 63.43	6.548	3,314% to 11,41%	97.86	96,2% to 98,92%	52.204
> 64.77	6.548	3,314% to 11,41%	98.05	96,44% to 99,06%	52.299
> 65.18	6.548	3,314% to 11,41%	98.25	96,7% to 99,19%	52.399
> 68.19	5.952	2,891% to 10,67%	98.25	96,7% to 99,19%	52.101
> 71.3	5.952	2,891% to 10,67%	98.44	96,95% to 99,32%	52.196
> 71.51	5.357	2,479% to 9,926%	98.44	96,95% to 99,32%	51.8985
> 72.36	5.357	2,479% to 9,926%	98.64	97,21% to 99,45%	51.9985
> 73.14	5.357	2,479% to 9,926%	98.83	97,47% to 99,57%	52.0935
> 76.25	5.357	2,479% to 9,926%	99.03	97,74% to 99,68%	52.1935
> 84.79	5.357	2,479% to 9,926%	99.22	98,02% to 99,79%	52.2885
> 91.39	5.357	2,479% to 9,926%	99.42	98,3% to 99,88%	52.3885
> 102.7	4.762	2,078% to 9,167%	99.42	98,3% to 99,88%	52.091
> 114.6	4.167	1,691% to 8,396%	99.42	98,3% to 99,88%	51.7935
> 117.5	3.571	1,322% to 7,611%	99.42	98,3% to 99,88%	51.4955
> 130.4	3.571	1,322% to 7,611%	99.61	98,6% to 99,95%	51.5905
> 157.5	2.976	0,9733% to 6,808%	99.61	98,6% to 99,95%	51.293
> 174.4	2.381	0,6525% to 5,984%	99.61	98,6% to 99,95%	50.9955
> 186.5	1.786	0,3698% to 5,13%	99.61	98,6% to 99,95%	50.698
> 198.7	1.786	0,3698% to 5,13%	99.81	98,92% to 100%	50.798
> 209.2	1.786	0,3698% to 5,13%	100	99,28% to 100%	50.893
> 236.4	1.19	0,1445% to 4,234%	100	99,28% to 100%	50.595
> 260.6	0.5952	0,01507% to 3,272%	100	99,28% to 100%	50.2976

## Sheet: NGP (TG2+) IgA
Cut off	Sensitivity%	95% CI	Specificity%	95% CI	Accuracy%
> 0.175	100	85,75% to 100%	12.87	10,09% to 16,08%	56.435
> 0.365	100	85,75% to 100%	13.06	10,27% to 16,29%	56.53
> 0.425	100	85,75% to 100%	13.26	10,44% to 16,5%	56.63
> 0.475	100	85,75% to 100%	13.45	10,62% to 16,71%	56.725
> 0.5	100	85,75% to 100%	13.65	10,79% to 16,92%	56.825
> 0.525	100	85,75% to 100%	13.84	10,97% to 17,13%	56.92
> 0.535	100	85,75% to 100%	14.04	11,15% to 17,35%	57.02
> 0.555	100	85,75% to 100%	14.42	11,5% to 17,77%	57.21
> 0.575	100	85,75% to 100%	14.62	11,68% to 17,98%	57.31
> 0.61	100	85,75% to 100%	14.81	11,85% to 18,19%	57.405
> 0.645	100	85,75% to 100%	15.01	12,03% to 18,4%	57.505
> 0.66	100	85,75% to 100%	15.4	12,39% to 18,82%	57.7
> 0.685	100	85,75% to 100%	15.59	12,56% to 19,03%	57.795
> 0.71	100	85,75% to 100%	15.79	12,74% to 19,24%	57.895
> 0.735	100	85,75% to 100%	15.98	12,92% to 19,45%	57.99
> 0.755	100	85,75% to 100%	16.18	13,1% to 19,66%	58.09
> 0.765	100	85,75% to 100%	16.37	13,28% to 19,87%	58.185
> 0.775	100	85,75% to 100%	16.57	13,45% to 20,07%	58.285
> 0.785	100	85,75% to 100%	16.76	13,63% to 20,28%	58.38
> 0.795	100	85,75% to 100%	16.96	13,81% to 20,49%	58.48
> 0.805	100	85,75% to 100%	17.15	13,99% to 20,7%	58.575
> 0.82	100	85,75% to 100%	17.35	14,17% to 20,91%	58.675
> 0.835	100	85,75% to 100%	17.54	14,35% to 21,12%	58.77
> 0.845	100	85,75% to 100%	17.74	14,53% to 21,32%	58.87
> 0.86	100	85,75% to 100%	17.93	14,71% to 21,53%	58.965
> 0.885	100	85,75% to 100%	18.13	14,89% to 21,74%	59.065
> 0.91	100	85,75% to 100%	18.52	15,25% to 22,16%	59.26
> 0.925	100	85,75% to 100%	18.71	15,43% to 22,36%	59.355
> 0.965	100	85,75% to 100%	18.91	15,61% to 22,57%	59.455
> 1.015	100	85,75% to 100%	19.1	15,79% to 22,78%	59.55
> 1.04	100	85,75% to 100%	19.3	15,97% to 22,98%	59.65
> 1.06	100	85,75% to 100%	19.88	16,51% to 23,6%	59.94
> 1.085	100	85,75% to 100%	20.27	16,88% to 24,02%	60.135
> 1.105	100	85,75% to 100%	20.66	17,24% to 24,43%	60.33
> 1.13	100	85,75% to 100%	20.86	17,42% to 24,63%	60.43
> 1.155	100	85,75% to 100%	21.05	17,6% to 24,84%	60.525
> 1.165	100	85,75% to 100%	21.25	17,78% to 25,05%	60.625
> 1.2	100	85,75% to 100%	21.44	17,97% to 25,25%	60.72
> 1.235	100	85,75% to 100%	22.03	18,51% to 25,87%	61.015
> 1.25	100	85,75% to 100%	22.42	18,88% to 26,28%	61.21
> 1.275	100	85,75% to 100%	22.61	19,06% to 26,48%	61.305
> 1.295	100	85,75% to 100%	22.81	19,24% to 26,69%	61.405
> 1.305	100	85,75% to 100%	23	19,43% to 26,89%	61.5
> 1.34	100	85,75% to 100%	23.2	19,61% to 27,1%	61.6
> 1.375	100	85,75% to 100%	23.39	19,79% to 27,3%	61.695
> 1.385	100	85,75% to 100%	23.59	19,98% to 27,5%	61.795
> 1.415	100	85,75% to 100%	23.98	20,34% to 27,91%	61.99
> 1.445	100	85,75% to 100%	24.17	20,53% to 28,12%	62.085
> 1.455	100	85,75% to 100%	24.56	20,89% to 28,52%	62.28
> 1.475	100	85,75% to 100%	24.76	21,08% to 28,73%	62.38
> 1.515	100	85,75% to 100%	24.95	21,26% to 28,93%	62.475
> 1.545	100	85,75% to 100%	25.15	21,45% to 29,13%	62.575
> 1.585	100	85,75% to 100%	25.34	21,63% to 29,34%	62.67
> 1.63	100	85,75% to 100%	25.54	21,82% to 29,54%	62.77
> 1.665	100	85,75% to 100%	25.73	22% to 29,74%	62.865
> 1.705	100	85,75% to 100%	25.93	22,18% to 29,95%	62.965
> 1.73	100	85,75% to 100%	26.12	22,37% to 30,15%	63.06
> 1.765	100	85,75% to 100%	26.32	22,55% to 30,35%	63.16
> 1.795	100	85,75% to 100%	26.51	22,74% to 30,56%	63.255
> 1.805	100	85,75% to 100%	26.9	23,11% to 30,96%	63.45
> 1.815	100	85,75% to 100%	27.1	23,29% to 31,16%	63.55
> 1.825	100	85,75% to 100%	27.49	23,66% to 31,57%	63.745
> 1.84	100	85,75% to 100%	27.68	23,85% to 31,77%	63.84
> 1.855	100	85,75% to 100%	27.88	24,03% to 31,97%	63.94
> 1.87	100	85,75% to 100%	28.07	24,22% to 32,17%	64.035
> 1.925	100	85,75% to 100%	28.27	24,41% to 32,38%	64.135
> 1.975	100	85,75% to 100%	28.46	24,59% to 32,58%	64.23
> 1.985	100	85,75% to 100%	28.65	24,78% to 32,78%	64.325
> 2	100	85,75% to 100%	29.04	25,15% to 33,18%	64.52
> 2.015	100	85,75% to 100%	29.24	25,34% to 33,39%	64.62
> 2.03	100	85,75% to 100%	29.43	25,52% to 33,59%	64.715
> 2.05	100	85,75% to 100%	30.02	26,08% to 34,19%	65.01
> 2.065	100	85,75% to 100%	30.21	26,27% to 34,39%	65.105
> 2.075	100	85,75% to 100%	30.6	26,64% to 34,79%	65.3
> 2.09	100	85,75% to 100%	30.8	26,83% to 34,99%	65.4
> 2.105	100	85,75% to 100%	30.99	27,01% to 35,19%	65.495
> 2.13	100	85,75% to 100%	31.19	27,2% to 35,4%	65.595
> 2.16	100	85,75% to 100%	31.38	27,39% to 35,6%	65.69
> 2.18	100	85,75% to 100%	31.77	27,76% to 36%	65.885
> 2.2	100	85,75% to 100%	31.97	27,95% to 36,2%	65.985
> 2.22	100	85,75% to 100%	32.16	28,14% to 36,4%	66.08
> 2.245	100	85,75% to 100%	32.36	28,32% to 36,6%	66.18
> 2.295	100	85,75% to 100%	32.55	28,51% to 36,8%	66.275
> 2.345	100	85,75% to 100%	32.75	28,7% to 37%	66.375
> 2.39	100	85,75% to 100%	32.94	28,89% to 37,2%	66.47
> 2.43	100	85,75% to 100%	33.14	29,07% to 37,4%	66.57
> 2.445	100	85,75% to 100%	33.33	29,26% to 37,6%	66.665
> 2.46	100	85,75% to 100%	33.72	29,64% to 38%	66.86
> 2.51	100	85,75% to 100%	33.92	29,83% to 38,2%	66.96
> 2.56	100	85,75% to 100%	34.11	30,01% to 38,4%	67.055
> 2.605	100	85,75% to 100%	34.31	30,2% to 38,59%	67.155
> 2.655	100	85,75% to 100%	34.5	30,39% to 38,79%	67.25
> 2.68	100	85,75% to 100%	34.7	30,58% to 38,99%	67.35
> 2.705	100	85,75% to 100%	34.89	30,77% to 39,19%	67.445
> 2.73	100	85,75% to 100%	35.09	30,96% to 39,39%	67.545
> 2.775	100	85,75% to 100%	35.28	31,15% to 39,59%	67.64
> 2.815	100	85,75% to 100%	35.48	31,33% to 39,79%	67.74
> 2.84	100	85,75% to 100%	35.67	31,52% to 39,99%	67.835
> 2.88	100	85,75% to 100%	35.87	31,71% to 40,19%	67.935
> 2.905	100	85,75% to 100%	36.06	31,9% to 40,39%	68.03
> 2.915	100	85,75% to 100%	36.26	32,09% to 40,58%	68.13
> 2.94	100	85,75% to 100%	36.45	32,28% to 40,78%	68.225
> 3	100	85,75% to 100%	36.84	32,66% to 41,18%	68.42
> 3.055	100	85,75% to 100%	37.04	32,85% to 41,38%	68.52
> 3.075	100	85,75% to 100%	37.23	33,04% to 41,58%	68.615
> 3.115	100	85,75% to 100%	37.62	33,41% to 41,97%	68.81
> 3.16	100	85,75% to 100%	37.82	33,6% to 42,17%	68.91
> 3.175	100	85,75% to 100%	38.01	33,79% to 42,37%	69.005
> 3.185	100	85,75% to 100%	38.21	33,98% to 42,57%	69.105
> 3.28	100	85,75% to 100%	38.6	34,36% to 42,96%	69.3
> 3.375	100	85,75% to 100%	38.79	34,55% to 43,16%	69.395
> 3.4	100	85,75% to 100%	39.18	34,93% to 43,56%	69.59
> 3.435	100	85,75% to 100%	39.57	35,31% to 43,95%	69.785
> 3.48	100	85,75% to 100%	39.77	35,5% to 44,15%	69.885
> 3.525	100	85,75% to 100%	39.96	35,69% to 44,34%	69.98
> 3.545	100	85,75% to 100%	40.16	35,88% to 44,54%	70.08
> 3.555	100	85,75% to 100%	40.35	36,07% to 44,74%	70.175
> 3.575	100	85,75% to 100%	40.55	36,26% to 44,94%	70.275
> 3.615	100	85,75% to 100%	40.74	36,46% to 45,13%	70.37
> 3.665	100	85,75% to 100%	40.94	36,65% to 45,33%	70.47
> 3.7	100	85,75% to 100%	41.13	36,84% to 45,53%	70.565
> 3.725	100	85,75% to 100%	41.33	37,03% to 45,72%	70.665
> 3.755	100	85,75% to 100%	41.52	37,22% to 45,92%	70.76
> 3.775	100	85,75% to 100%	41.72	37,41% to 46,12%	70.86
> 3.81	100	85,75% to 100%	41.91	37,6% to 46,31%	70.955
> 3.86	100	85,75% to 100%	42.11	37,79% to 46,51%	71.055
> 3.91	100	85,75% to 100%	42.3	37,98% to 46,71%	71.15
> 3.98	100	85,75% to 100%	42.5	38,17% to 46,9%	71.25
> 4.03	100	85,75% to 100%	42.69	38,37% to 47,1%	71.345
> 4.06	100	85,75% to 100%	42.88	38,56% to 47,3%	71.44
> 4.11	100	85,75% to 100%	43.27	38,94% to 47,69%	71.635
> 4.165	100	85,75% to 100%	43.47	39,13% to 47,88%	71.735
> 4.21	100	85,75% to 100%	43.66	39,32% to 48,08%	71.83
> 4.255	100	85,75% to 100%	43.86	39,51% to 48,28%	71.93
> 4.345	100	85,75% to 100%	44.05	39,71% to 48,47%	72.025
> 4.435	100	85,75% to 100%	44.25	39,9% to 48,67%	72.125
> 4.475	100	85,75% to 100%	44.44	40,09% to 48,86%	72.22
> 4.5	100	85,75% to 100%	44.64	40,28% to 49,06%	72.32
> 4.52	100	85,75% to 100%	44.83	40,47% to 49,25%	72.415
> 4.58	100	85,75% to 100%	45.03	40,67% to 49,45%	72.515
> 4.655	100	85,75% to 100%	45.22	40,86% to 49,65%	72.61
> 4.725	100	85,75% to 100%	45.42	41,05% to 49,84%	72.71
> 4.81	100	85,75% to 100%	45.61	41,24% to 50,04%	72.805
> 4.9	100	85,75% to 100%	45.81	41,43% to 50,23%	72.905
> 4.97	100	85,75% to 100%	46	41,63% to 50,43%	73
> 5.05	100	85,75% to 100%	46.2	41,82% to 50,62%	73.1
> 5.16	100	85,75% to 100%	46.39	42,01% to 50,82%	73.195
> 5.25	100	85,75% to 100%	46.59	42,21% to 51,01%	73.295
> 5.32	100	85,75% to 100%	46.78	42,4% to 51,21%	73.39
> 5.375	100	85,75% to 100%	46.98	42,59% to 51,4%	73.49
> 5.41	100	85,75% to 100%	47.17	42,78% to 51,6%	73.585
> 5.425	100	85,75% to 100%	47.37	42,98% to 51,79%	73.685
> 5.465	100	85,75% to 100%	47.56	43,17% to 51,99%	73.78
> 5.515	100	85,75% to 100%	47.76	43,36% to 52,18%	73.88
> 5.585	100	85,75% to 100%	47.95	43,56% to 52,37%	73.975
> 5.695	100	85,75% to 100%	48.15	43,75% to 52,57%	74.075
> 5.825	100	85,75% to 100%	48.54	44,13% to 52,96%	74.27
> 5.94	100	85,75% to 100%	48.73	44,33% to 53,15%	74.365
> 6.01	100	85,75% to 100%	48.93	44,52% to 53,35%	74.465
> 6.08	95.83	78,88% to 99,89%	49.32	44,91% to 53,73%	72.575
> 6.125	95.83	78,88% to 99,89%	49.51	45,1% to 53,93%	72.67
> 6.175	95.83	78,88% to 99,89%	49.71	45,3% to 54,12%	72.77
> 6.235	95.83	78,88% to 99,89%	49.9	45,49% to 54,32%	72.865
> 6.26	95.83	78,88% to 99,89%	50.1	45,68% to 54,51%	72.965
> 6.365	95.83	78,88% to 99,89%	50.29	45,88% to 54,7%	73.06
> 6.53	95.83	78,88% to 99,89%	50.49	46,07% to 54,9%	73.16
> 6.63	95.83	78,88% to 99,89%	50.68	46,27% to 55,09%	73.255
> 6.7	95.83	78,88% to 99,89%	50.88	46,46% to 55,28%	73.355
> 6.785	95.83	78,88% to 99,89%	51.07	46,65% to 55,48%	73.45
> 6.86	95.83	78,88% to 99,89%	51.27	46,85% to 55,67%	73.55
> 6.915	95.83	78,88% to 99,89%	51.46	47,04% to 55,87%	73.645
> 6.95	95.83	78,88% to 99,89%	51.66	47,24% to 56,06%	73.745
> 6.975	95.83	78,88% to 99,89%	51.85	47,43% to 56,25%	73.84
> 7.175	95.83	78,88% to 99,89%	52.24	47,82% to 56,64%	74.035
> 7.375	95.83	78,88% to 99,89%	52.44	48,01% to 56,83%	74.135
> 7.455	95.83	78,88% to 99,89%	52.63	48,21% to 57,02%	74.23
> 7.595	95.83	78,88% to 99,89%	52.83	48,4% to 57,22%	74.33
> 7.69	95.83	78,88% to 99,89%	53.02	48,6% to 57,41%	74.425
> 7.75	95.83	78,88% to 99,89%	53.22	48,79% to 57,6%	74.525
> 7.855	95.83	78,88% to 99,89%	53.41	48,99% to 57,79%	74.62
> 8.065	95.83	78,88% to 99,89%	53.8	49,38% to 58,18%	74.815
> 8.255	95.83	78,88% to 99,89%	54	49,57% to 58,37%	74.915
> 8.38	95.83	78,88% to 99,89%	54.19	49,77% to 58,57%	75.01
> 8.475	95.83	78,88% to 99,89%	54.39	49,96% to 58,76%	75.11
> 8.585	95.83	78,88% to 99,89%	54.58	50,16% to 58,95%	75.205
> 8.73	95.83	78,88% to 99,89%	54.78	50,35% to 59,14%	75.305
> 8.79	95.83	78,88% to 99,89%	54.97	50,55% to 59,33%	75.4
> 8.805	95.83	78,88% to 99,89%	55.17	50,75% to 59,53%	75.5
> 8.83	95.83	78,88% to 99,89%	55.36	50,94% to 59,72%	75.595
> 8.865	95.83	78,88% to 99,89%	55.56	51,14% to 59,91%	75.695
> 8.96	95.83	78,88% to 99,89%	55.75	51,33% to 60,1%	75.79
> 9.05	95.83	78,88% to 99,89%	55.95	51,53% to 60,29%	75.89
> 9.07	95.83	78,88% to 99,89%	56.14	51,72% to 60,49%	75.985
> 9.12	95.83	78,88% to 99,89%	56.34	51,92% to 60,68%	76.085
> 9.215	95.83	78,88% to 99,89%	56.53	52,12% to 60,87%	76.18
> 9.32	95.83	78,88% to 99,89%	56.73	52,31% to 61,06%	76.28
> 9.465	95.83	78,88% to 99,89%	56.92	52,51% to 61,25%	76.375
> 9.61	95.83	78,88% to 99,89%	57.12	52,7% to 61,44%	76.475
> 9.755	95.83	78,88% to 99,89%	57.31	52,9% to 61,63%	76.57
> 9.88	95.83	78,88% to 99,89%	57.5	53,1% to 61,83%	76.665
> 10.03	95.83	78,88% to 99,89%	57.89	53,49% to 62,21%	76.86
> 10.19	95.83	78,88% to 99,89%	58.48	54,08% to 62,78%	77.155
> 10.32	95.83	78,88% to 99,89%	58.67	54,28% to 62,97%	77.25
> 10.55	95.83	78,88% to 99,89%	58.87	54,47% to 63,16%	77.35
> 10.71	95.83	78,88% to 99,89%	59.06	54,67% to 63,35%	77.445
> 10.85	95.83	78,88% to 99,89%	59.26	54,87% to 63,54%	77.545
> 11.02	95.83	78,88% to 99,89%	59.45	55,06% to 63,74%	77.64
> 11.1	95.83	78,88% to 99,89%	59.65	55,26% to 63,93%	77.74
> 11.12	95.83	78,88% to 99,89%	59.84	55,46% to 64,12%	77.835
> 11.13	95.83	78,88% to 99,89%	60.04	55,66% to 64,31%	77.935
> 11.21	95.83	78,88% to 99,89%	60.23	55,85% to 64,5%	78.03
> 11.31	95.83	78,88% to 99,89%	60.43	56,05% to 64,69%	78.13
> 11.36	95.83	78,88% to 99,89%	60.62	56,25% to 64,88%	78.225
> 11.41	95.83	78,88% to 99,89%	60.82	56,44% to 65,07%	78.325
> 11.47	95.83	78,88% to 99,89%	61.01	56,64% to 65,26%	78.42
> 11.49	95.83	78,88% to 99,89%	61.21	56,84% to 65,45%	78.52
> 11.52	95.83	78,88% to 99,89%	61.4	57,04% to 65,64%	78.615
> 11.66	95.83	78,88% to 99,89%	61.6	57,24% to 65,83%	78.715
> 11.81	95.83	78,88% to 99,89%	61.79	57,43% to 66,02%	78.81
> 12.06	95.83	78,88% to 99,89%	61.99	57,63% to 66,21%	78.91
> 12.28	95.83	78,88% to 99,89%	62.18	57,83% to 66,4%	79.005
> 12.32	95.83	78,88% to 99,89%	62.38	58,03% to 66,59%	79.105
> 12.38	95.83	78,88% to 99,89%	62.57	58,23% to 66,78%	79.2
> 12.5	95.83	78,88% to 99,89%	62.77	58,42% to 66,96%	79.3
> 12.61	95.83	78,88% to 99,89%	62.96	58,62% to 67,15%	79.395
> 12.78	95.83	78,88% to 99,89%	63.16	58,82% to 67,34%	79.495
> 12.91	95.83	78,88% to 99,89%	63.35	59,02% to 67,53%	79.59
> 12.98	95.83	78,88% to 99,89%	63.55	59,22% to 67,72%	79.69
> 13.12	95.83	78,88% to 99,89%	63.74	59,42% to 67,91%	79.785
> 13.25	95.83	78,88% to 99,89%	63.94	59,61% to 68,1%	79.885
> 13.35	95.83	78,88% to 99,89%	64.13	59,81% to 68,29%	79.98
> 13.44	95.83	78,88% to 99,89%	64.33	60,01% to 68,48%	80.08
> 13.5	95.83	78,88% to 99,89%	64.52	60,21% to 68,67%	80.175
> 13.56	95.83	78,88% to 99,89%	64.72	60,41% to 68,85%	80.275
> 13.65	95.83	78,88% to 99,89%	64.91	60,61% to 69,04%	80.37
> 13.76	95.83	78,88% to 99,89%	65.11	60,81% to 69,23%	80.47
> 13.85	95.83	78,88% to 99,89%	65.3	61,01% to 69,42%	80.565
> 13.87	95.83	78,88% to 99,89%	65.5	61,21% to 69,61%	80.665
> 13.92	95.83	78,88% to 99,89%	65.69	61,41% to 69,8%	80.76
> 13.96	95.83	78,88% to 99,89%	65.89	61,6% to 69,99%	80.86
> 13.97	95.83	78,88% to 99,89%	66.08	61,8% to 70,17%	80.955
> 14.05	95.83	78,88% to 99,89%	66.28	62% to 70,36%	81.055
> 14.14	95.83	78,88% to 99,89%	66.47	62,2% to 70,55%	81.15
> 14.27	95.83	78,88% to 99,89%	66.67	62,4% to 70,74%	81.25
> 14.39	95.83	78,88% to 99,89%	66.86	62,6% to 70,93%	81.345
> 14.41	95.83	78,88% to 99,89%	67.06	62,8% to 71,11%	81.445
> 14.5	95.83	78,88% to 99,89%	67.25	63% to 71,3%	81.54
> 14.69	95.83	78,88% to 99,89%	67.45	63,2% to 71,49%	81.64
> 14.87	95.83	78,88% to 99,89%	67.64	63,4% to 71,68%	81.735
> 15.17	95.83	78,88% to 99,89%	67.84	63,6% to 71,86%	81.835
> 15.53	95.83	78,88% to 99,89%	68.03	63,8% to 72,05%	81.93
> 15.76	95.83	78,88% to 99,89%	68.23	64% to 72,24%	82.03
> 15.87	95.83	78,88% to 99,89%	68.42	64,2% to 72,42%	82.125
> 15.93	95.83	78,88% to 99,89%	68.62	64,4% to 72,61%	82.225
> 16.13	95.83	78,88% to 99,89%	68.81	64,6% to 72,8%	82.32
> 16.33	95.83	78,88% to 99,89%	69.01	64,81% to 72,99%	82.42
> 16.52	95.83	78,88% to 99,89%	69.2	65,01% to 73,17%	82.515
> 16.69	95.83	78,88% to 99,89%	69.4	65,21% to 73,36%	82.615
> 16.92	95.83	78,88% to 99,89%	69.59	65,41% to 73,55%	82.71
> 17.32	95.83	78,88% to 99,89%	69.79	65,61% to 73,73%	82.81
> 17.59	95.83	78,88% to 99,89%	69.98	65,81% to 73,92%	82.905
> 17.71	95.83	78,88% to 99,89%	70.18	66,01% to 74,11%	83.005
> 18.05	95.83	78,88% to 99,89%	70.37	66,21% to 74,29%	83.1
> 18.37	95.83	78,88% to 99,89%	70.57	66,41% to 74,48%	83.2
> 18.43	95.83	78,88% to 99,89%	70.76	66,61% to 74,66%	83.295
> 18.99	95.83	78,88% to 99,89%	70.96	66,82% to 74,85%	83.395
> 19.62	95.83	78,88% to 99,89%	71.15	67,02% to 75,04%	83.49
> 19.75	95.83	78,88% to 99,89%	71.35	67,22% to 75,22%	83.59
> 19.8	95.83	78,88% to 99,89%	71.54	67,42% to 75,41%	83.685
> 19.88	95.83	78,88% to 99,89%	71.73	67,62% to 75,59%	83.78
> 20.07	95.83	78,88% to 99,89%	71.93	67,83% to 75,78%	83.88
> 20.34	95.83	78,88% to 99,89%	72.12	68,03% to 75,97%	83.975
> 20.62	95.83	78,88% to 99,89%	72.32	68,23% to 76,15%	84.075
> 21.2	95.83	78,88% to 99,89%	72.51	68,43% to 76,34%	84.17
> 21.81	95.83	78,88% to 99,89%	72.71	68,63% to 76,52%	84.27
> 21.98	95.83	78,88% to 99,89%	72.9	68,84% to 76,71%	84.365
> 22.06	95.83	78,88% to 99,89%	73.1	69,04% to 76,89%	84.465
> 22.15	91.67	73% to 98,97%	73.1	69,04% to 76,89%	82.385
> 22.27	91.67	73% to 98,97%	73.29	69,24% to 77,08%	82.48
> 22.42	91.67	73% to 98,97%	73.49	69,44% to 77,26%	82.58
> 22.64	91.67	73% to 98,97%	73.68	69,65% to 77,45%	82.675
> 22.96	91.67	73% to 98,97%	73.88	69,85% to 77,63%	82.775
> 23.19	91.67	73% to 98,97%	74.07	70,05% to 77,82%	82.87
> 23.34	91.67	73% to 98,97%	74.27	70,26% to 78%	82.97
> 23.47	91.67	73% to 98,97%	74.46	70,46% to 78,18%	83.065
> 23.64	87.5	67,64% to 97,34%	74.46	70,46% to 78,18%	80.98
> 23.96	87.5	67,64% to 97,34%	74.66	70,66% to 78,37%	81.08
> 24.41	87.5	67,64% to 97,34%	74.85	70,87% to 78,55%	81.175
> 24.7	87.5	67,64% to 97,34%	75.05	71,07% to 78,74%	81.275
> 25.14	87.5	67,64% to 97,34%	75.24	71,27% to 78,92%	81.37
> 25.67	87.5	67,64% to 97,34%	75.44	71,48% to 79,11%	81.47
> 25.95	87.5	67,64% to 97,34%	75.63	71,68% to 79,29%	81.565
> 26.49	87.5	67,64% to 97,34%	75.83	71,88% to 79,47%	81.665
> 27.47	87.5	67,64% to 97,34%	76.02	72,09% to 79,66%	81.76
> 28.19	87.5	67,64% to 97,34%	76.22	72,29% to 79,84%	81.86
> 28.44	87.5	67,64% to 97,34%	76.41	72,5% to 80,02%	81.955
> 28.9	87.5	67,64% to 97,34%	76.61	72,7% to 80,21%	82.055
> 29.38	87.5	67,64% to 97,34%	76.8	72,9% to 80,39%	82.15
> 29.53	87.5	67,64% to 97,34%	77	73,11% to 80,57%	82.25
> 29.62	87.5	67,64% to 97,34%	77.19	73,31% to 80,76%	82.345
> 29.7	87.5	67,64% to 97,34%	77.39	73,52% to 80,94%	82.445
> 29.84	87.5	67,64% to 97,34%	77.58	73,72% to 81,12%	82.54
> 30.17	87.5	67,64% to 97,34%	77.78	73,93% to 81,3%	82.64
> 30.41	87.5	67,64% to 97,34%	77.97	74,13% to 81,49%	82.735
> 30.53	87.5	67,64% to 97,34%	78.17	74,34% to 81,67%	82.835
> 31.04	87.5	67,64% to 97,34%	78.36	74,54% to 81,85%	82.93
> 31.74	87.5	67,64% to 97,34%	78.56	74,75% to 82,03%	83.03
> 32.14	87.5	67,64% to 97,34%	78.75	74,95% to 82,22%	83.125
> 32.5	87.5	67,64% to 97,34%	78.95	75,16% to 82,4%	83.225
> 33.11	87.5	67,64% to 97,34%	79.14	75,37% to 82,58%	83.32
> 33.5	87.5	67,64% to 97,34%	79.34	75,57% to 82,76%	83.42
> 33.62	87.5	67,64% to 97,34%	79.53	75,78% to 82,94%	83.515
> 33.81	87.5	67,64% to 97,34%	79.73	75,98% to 83,12%	83.615
> 34.34	87.5	67,64% to 97,34%	79.92	76,19% to 83,31%	83.71
> 34.87	87.5	67,64% to 97,34%	80.12	76,4% to 83,49%	83.81
> 35.16	87.5	67,64% to 97,34%	80.31	76,6% to 83,67%	83.905
> 35.52	87.5	67,64% to 97,34%	80.51	76,81% to 83,85%	84.005
> 35.77	87.5	67,64% to 97,34%	80.7	77,02% to 84,03%	84.1
> 36.05	87.5	67,64% to 97,34%	80.9	77,22% to 84,21%	84.2
> 36.4	87.5	67,64% to 97,34%	81.09	77,43% to 84,39%	84.295
> 36.64	87.5	67,64% to 97,34%	81.29	77,64% to 84,57%	84.395
> 36.92	87.5	67,64% to 97,34%	81.48	77,84% to 84,75%	84.49
> 37.67	87.5	67,64% to 97,34%	81.68	78,05% to 84,93%	84.59
> 38.44	87.5	67,64% to 97,34%	81.87	78,26% to 85,11%	84.685
> 39.15	83.33	62,62% to 95,26%	81.87	78,26% to 85,11%	82.6
> 40.08	83.33	62,62% to 95,26%	82.07	78,47% to 85,29%	82.7
> 41.55	83.33	62,62% to 95,26%	82.26	78,68% to 85,47%	82.795
> 42.66	83.33	62,62% to 95,26%	82.46	78,88% to 85,65%	82.895
> 42.75	79.17	57,85% to 92,87%	82.46	78,88% to 85,65%	80.815
> 42.77	79.17	57,85% to 92,87%	82.65	79,09% to 85,83%	80.91
> 42.79	75	53,29% to 90,23%	82.65	79,09% to 85,83%	78.825
> 42.86	75	53,29% to 90,23%	82.85	79,3% to 86,01%	78.925
> 43.12	75	53,29% to 90,23%	83.04	79,51% to 86,19%	79.02
> 43.52	75	53,29% to 90,23%	83.24	79,72% to 86,37%	79.12
> 43.95	75	53,29% to 90,23%	83.43	79,93% to 86,55%	79.215
> 44.53	75	53,29% to 90,23%	83.63	80,13% to 86,72%	79.315
> 45.09	75	53,29% to 90,23%	83.82	80,34% to 86,9%	79.41
> 45.41	75	53,29% to 90,23%	84.02	80,55% to 87,08%	79.51
> 46.41	75	53,29% to 90,23%	84.21	80,76% to 87,26%	79.605
> 47.72	75	53,29% to 90,23%	84.41	80,97% to 87,44%	79.705
> 48.15	75	53,29% to 90,23%	84.6	81,18% to 87,61%	79.8
> 48.56	75	53,29% to 90,23%	84.8	81,39% to 87,79%	79.9
> 49.31	70.83	48,91% to 87,38%	84.8	81,39% to 87,79%	77.815
> 49.86	70.83	48,91% to 87,38%	84.99	81,6% to 87,97%	77.91
> 50.23	70.83	48,91% to 87,38%	85.19	81,81% to 88,15%	78.01
> 50.44	70.83	48,91% to 87,38%	85.38	82,02% to 88,32%	78.105
> 50.52	70.83	48,91% to 87,38%	85.58	82,23% to 88,5%	78.205
> 51.69	70.83	48,91% to 87,38%	85.77	82,44% to 88,68%	78.3
> 53.29	70.83	48,91% to 87,38%	85.96	82,65% to 88,85%	78.395
> 53.97	70.83	48,91% to 87,38%	86.16	82,87% to 89,03%	78.495
> 54.26	66.67	44,68% to 84,37%	86.16	82,87% to 89,03%	76.415
> 54.86	66.67	44,68% to 84,37%	86.35	83,08% to 89,21%	76.51
> 55.67	66.67	44,68% to 84,37%	86.55	83,29% to 89,38%	76.61
> 56.9	66.67	44,68% to 84,37%	86.74	83,5% to 89,56%	76.705
> 58.74	66.67	44,68% to 84,37%	86.94	83,71% to 89,73%	76.805
> 59.69	66.67	44,68% to 84,37%	87.13	83,92% to 89,91%	76.9
> 60.81	66.67	44,68% to 84,37%	87.33	84,14% to 90,08%	77
> 62.43	66.67	44,68% to 84,37%	87.52	84,35% to 90,26%	77.095
> 63.49	62.5	40,59% to 81,2%	87.52	84,35% to 90,26%	75.01
> 64.11	62.5	40,59% to 81,2%	87.72	84,56% to 90,43%	75.11
> 64.42	62.5	40,59% to 81,2%	87.91	84,78% to 90,61%	75.205
> 64.87	62.5	40,59% to 81,2%	88.11	84,99% to 90,78%	75.305
> 65.43	62.5	40,59% to 81,2%	88.3	85,2% to 90,96%	75.4
> 65.87	62.5	40,59% to 81,2%	88.5	85,42% to 91,13%	75.5
> 66.19	62.5	40,59% to 81,2%	88.69	85,63% to 91,3%	75.595
> 66.76	62.5	40,59% to 81,2%	88.89	85,84% to 91,48%	75.695
> 67.47	62.5	40,59% to 81,2%	89.08	86,06% to 91,65%	75.79
> 68.09	62.5	40,59% to 81,2%	89.28	86,27% to 91,82%	75.89
> 69.11	62.5	40,59% to 81,2%	89.47	86,49% to 91,99%	75.985
> 70.07	62.5	40,59% to 81,2%	89.67	86,7% to 92,16%	76.085
> 70.57	62.5	40,59% to 81,2%	89.86	86,92% to 92,34%	76.18
> 70.98	62.5	40,59% to 81,2%	90.06	87,14% to 92,51%	76.28
> 71.23	58.33	36,64% to 77,89%	90.06	87,14% to 92,51%	74.195
> 72.4	58.33	36,64% to 77,89%	90.25	87,35% to 92,68%	74.29
> 73.56	58.33	36,64% to 77,89%	90.45	87,57% to 92,85%	74.39
> 73.81	54.17	32,82% to 74,45%	90.45	87,57% to 92,85%	72.31
> 74.01	54.17	32,82% to 74,45%	90.64	87,79% to 93,02%	72.405
> 74.15	54.17	32,82% to 74,45%	90.84	88% to 93,19%	72.505
> 75.89	54.17	32,82% to 74,45%	91.03	88,22% to 93,36%	72.6
> 78.34	54.17	32,82% to 74,45%	91.23	88,44% to 93,53%	72.7
> 79.25	54.17	32,82% to 74,45%	91.42	88,66% to 93,7%	72.795
> 79.84	54.17	32,82% to 74,45%	91.62	88,88% to 93,87%	72.895
> 81.3	50	29,12% to 70,88%	91.62	88,88% to 93,87%	70.81
> 83.4	50	29,12% to 70,88%	91.81	89,09% to 94,04%	70.905
> 84.61	45.83	25,55% to 67,18%	91.81	89,09% to 94,04%	68.82
> 84.75	45.83	25,55% to 67,18%	92.01	89,31% to 94,2%	68.92
> 86.05	45.83	25,55% to 67,18%	92.2	89,53% to 94,37%	69.015
> 89.56	45.83	25,55% to 67,18%	92.4	89,75% to 94,54%	69.115
> 93.71	45.83	25,55% to 67,18%	92.59	89,97% to 94,71%	69.21
> 96.16	41.67	22,11% to 63,36%	92.59	89,97% to 94,71%	67.13
> 97.53	41.67	22,11% to 63,36%	92.79	90,2% to 94,87%	67.23
> 98.78	41.67	22,11% to 63,36%	92.98	90,42% to 95,04%	67.325
> 99.52	37.5	18,8% to 59,41%	92.98	90,42% to 95,04%	65.24
> 99.91	33.33	15,63% to 55,32%	92.98	90,42% to 95,04%	63.155
> 100.2	33.33	15,63% to 55,32%	93.18	90,64% to 95,2%	63.255
> 100.8	33.33	15,63% to 55,32%	93.37	90,86% to 95,37%	63.35
> 101.7	33.33	15,63% to 55,32%	93.57	91,08% to 95,53%	63.45
> 102.8	33.33	15,63% to 55,32%	93.76	91,31% to 95,69%	63.545
> 103.9	33.33	15,63% to 55,32%	93.96	91,53% to 95,86%	63.645
> 104.6	33.33	15,63% to 55,32%	94.15	91,76% to 96,02%	63.74
> 107.2	29.17	12,62% to 51,09%	94.15	91,76% to 96,02%	61.66
> 110.8	29.17	12,62% to 51,09%	94.35	91,98% to 96,18%	61.76
> 112.1	29.17	12,62% to 51,09%	94.54	92,21% to 96,34%	61.855
> 113.5	29.17	12,62% to 51,09%	94.74	92,43% to 96,5%	61.955
> 115.6	29.17	12,62% to 51,09%	94.93	92,66% to 96,66%	62.05
> 116.9	29.17	12,62% to 51,09%	95.13	92,89% to 96,82%	62.15
> 117.6	29.17	12,62% to 51,09%	95.32	93,12% to 96,98%	62.245
> 121.1	29.17	12,62% to 51,09%	95.52	93,35% to 97,14%	62.345
> 124.8	29.17	12,62% to 51,09%	95.71	93,58% to 97,29%	62.44
> 125.3	29.17	12,62% to 51,09%	95.91	93,81% to 97,45%	62.54
> 126.5	29.17	12,62% to 51,09%	96.1	94,04% to 97,6%	62.635
> 129.1	29.17	12,62% to 51,09%	96.3	94,28% to 97,76%	62.735
> 131.2	29.17	12,62% to 51,09%	96.49	94,51% to 97,91%	62.83
> 133.4	29.17	12,62% to 51,09%	96.69	94,75% to 98,06%	62.93
> 141.5	29.17	12,62% to 51,09%	96.88	94,98% to 98,21%	63.025
> 148.3	29.17	12,62% to 51,09%	97.08	95,22% to 98,35%	63.125
> 149.3	29.17	12,62% to 51,09%	97.27	95,46% to 98,5%	63.22
> 160.2	29.17	12,62% to 51,09%	97.47	95,71% to 98,64%	63.32
> 172	25	9,773% to 46,71%	97.47	95,71% to 98,64%	61.235
> 174.1	25	9,773% to 46,71%	97.66	95,95% to 98,79%	61.33
> 177.1	25	9,773% to 46,71%	97.86	96,2% to 98,92%	61.43
> 179.8	25	9,773% to 46,71%	98.05	96,44% to 99,06%	61.525
> 180.5	25	9,773% to 46,71%	98.25	96,7% to 99,19%	61.625
> 183	25	9,773% to 46,71%	98.44	96,95% to 99,32%	61.72
> 185.2	20.83	7,132% to 42,15%	98.44	96,95% to 99,32%	59.635
> 185.5	20.83	7,132% to 42,15%	98.64	97,21% to 99,45%	59.735
> 196.4	20.83	7,132% to 42,15%	98.83	97,47% to 99,57%	59.83
> 208.4	16.67	4,735% to 37,38%	98.83	97,47% to 99,57%	57.75
> 214.8	16.67	4,735% to 37,38%	99.03	97,74% to 99,68%	57.85
> 221	16.67	4,735% to 37,38%	99.22	98,02% to 99,79%	57.945
> 233.2	12.5	2,656% to 32,36%	99.22	98,02% to 99,79%	55.86
> 264.8	12.5	2,656% to 32,36%	99.42	98,3% to 99,88%	55.96
> 286.4	8.333	1,026% to 27%	99.42	98,3% to 99,88%	53.8765
> 289.2	8.333	1,026% to 27%	99.61	98,6% to 99,95%	53.9715
> 313.6	8.333	1,026% to 27%	99.81	98,92% to 100%	54.0715
> 340.8	4.167	0,1054% to 21,12%	99.81	98,92% to 100%	51.9885
> 347.4	4.167	0,1054% to 21,12%	100	99,28% to 100%	52.0835

## Sheet: DGP (TG2+) IgA
Cut off	Sensitivity%	95% CI	Specificity%	95% CI	Accuracy%
> 0.195	100	85,75% to 100%	33.72	29,64% to 38%	66.86
> 0.4	100	85,75% to 100%	33.92	29,83% to 38,2%	66.96
> 0.415	100	85,75% to 100%	34.11	30,01% to 38,4%	67.055
> 0.49	100	85,75% to 100%	34.31	30,2% to 38,59%	67.155
> 0.575	100	85,75% to 100%	34.5	30,39% to 38,79%	67.25
> 0.605	100	85,75% to 100%	34.7	30,58% to 38,99%	67.35
> 0.645	100	85,75% to 100%	34.89	30,77% to 39,19%	67.445
> 0.675	100	85,75% to 100%	35.09	30,96% to 39,39%	67.545
> 0.695	100	85,75% to 100%	35.48	31,33% to 39,79%	67.74
> 0.74	100	85,75% to 100%	35.67	31,52% to 39,99%	67.835
> 0.775	100	85,75% to 100%	35.87	31,71% to 40,19%	67.935
> 0.785	100	85,75% to 100%	36.06	31,9% to 40,39%	68.03
> 0.795	100	85,75% to 100%	36.26	32,09% to 40,58%	68.13
> 0.81	100	85,75% to 100%	36.45	32,28% to 40,78%	68.225
> 0.83	100	85,75% to 100%	36.65	32,47% to 40,98%	68.325
> 0.855	100	85,75% to 100%	37.23	33,04% to 41,58%	68.615
> 0.875	100	85,75% to 100%	37.43	33,22% to 41,77%	68.715
> 0.895	100	85,75% to 100%	37.62	33,41% to 41,97%	68.81
> 0.92	100	85,75% to 100%	37.82	33,6% to 42,17%	68.91
> 0.935	100	85,75% to 100%	38.01	33,79% to 42,37%	69.005
> 0.945	100	85,75% to 100%	38.21	33,98% to 42,57%	69.105
> 0.955	100	85,75% to 100%	38.4	34,17% to 42,76%	69.2
> 0.97	100	85,75% to 100%	38.79	34,55% to 43,16%	69.395
> 0.99	100	85,75% to 100%	38.99	34,74% to 43,36%	69.495
> 1.005	100	85,75% to 100%	39.18	34,93% to 43,56%	69.59
> 1.015	100	85,75% to 100%	39.77	35,5% to 44,15%	69.885
> 1.025	100	85,75% to 100%	40.35	36,07% to 44,74%	70.175
> 1.035	100	85,75% to 100%	40.55	36,26% to 44,94%	70.275
> 1.075	100	85,75% to 100%	40.94	36,65% to 45,33%	70.47
> 1.115	100	85,75% to 100%	41.52	37,22% to 45,92%	70.76
> 1.15	100	85,75% to 100%	41.91	37,6% to 46,31%	70.955
> 1.205	100	85,75% to 100%	42.11	37,79% to 46,51%	71.055
> 1.245	100	85,75% to 100%	42.3	37,98% to 46,71%	71.15
> 1.27	100	85,75% to 100%	42.5	38,17% to 46,9%	71.25
> 1.295	100	85,75% to 100%	42.69	38,37% to 47,1%	71.345
> 1.315	100	85,75% to 100%	43.08	38,75% to 47,49%	71.54
> 1.325	100	85,75% to 100%	43.47	39,13% to 47,88%	71.735
> 1.35	100	85,75% to 100%	44.05	39,71% to 48,47%	72.025
> 1.385	100	85,75% to 100%	44.44	40,09% to 48,86%	72.22
> 1.405	100	85,75% to 100%	44.64	40,28% to 49,06%	72.32
> 1.415	100	85,75% to 100%	44.83	40,47% to 49,25%	72.415
> 1.44	100	85,75% to 100%	45.03	40,67% to 49,45%	72.515
> 1.515	100	85,75% to 100%	45.22	40,86% to 49,65%	72.61
> 1.575	100	85,75% to 100%	45.42	41,05% to 49,84%	72.71
> 1.585	100	85,75% to 100%	45.61	41,24% to 50,04%	72.805
> 1.6	100	85,75% to 100%	45.81	41,43% to 50,23%	72.905
> 1.62	100	85,75% to 100%	46	41,63% to 50,43%	73
> 1.635	100	85,75% to 100%	46.2	41,82% to 50,62%	73.1
> 1.65	100	85,75% to 100%	46.39	42,01% to 50,82%	73.195
> 1.665	100	85,75% to 100%	46.98	42,59% to 51,4%	73.49
> 1.68	100	85,75% to 100%	47.17	42,78% to 51,6%	73.585
> 1.695	100	85,75% to 100%	47.37	42,98% to 51,79%	73.685
> 1.71	100	85,75% to 100%	47.56	43,17% to 51,99%	73.78
> 1.74	100	85,75% to 100%	47.76	43,36% to 52,18%	73.88
> 1.77	100	85,75% to 100%	47.95	43,56% to 52,37%	73.975
> 1.785	100	85,75% to 100%	48.34	43,94% to 52,76%	74.17
> 1.795	100	85,75% to 100%	48.54	44,13% to 52,96%	74.27
> 1.81	100	85,75% to 100%	48.93	44,52% to 53,35%	74.465
> 1.825	100	85,75% to 100%	49.12	44,72% to 53,54%	74.56
> 1.85	100	85,75% to 100%	49.32	44,91% to 53,73%	74.66
> 1.905	100	85,75% to 100%	49.71	45,3% to 54,12%	74.855
> 1.97	100	85,75% to 100%	49.9	45,49% to 54,32%	74.95
> 2.02	100	85,75% to 100%	50.1	45,68% to 54,51%	75.05
> 2.045	100	85,75% to 100%	50.29	45,88% to 54,7%	75.145
> 2.065	100	85,75% to 100%	50.68	46,27% to 55,09%	75.34
> 2.085	100	85,75% to 100%	50.88	46,46% to 55,28%	75.44
> 2.095	100	85,75% to 100%	51.07	46,65% to 55,48%	75.535
> 2.11	100	85,75% to 100%	51.27	46,85% to 55,67%	75.635
> 2.14	100	85,75% to 100%	51.46	47,04% to 55,87%	75.73
> 2.165	100	85,75% to 100%	51.85	47,43% to 56,25%	75.925
> 2.175	100	85,75% to 100%	52.05	47,63% to 56,44%	76.025
> 2.185	100	85,75% to 100%	52.24	47,82% to 56,64%	76.12
> 2.195	100	85,75% to 100%	52.44	48,01% to 56,83%	76.22
> 2.21	100	85,75% to 100%	52.63	48,21% to 57,02%	76.315
> 2.265	100	85,75% to 100%	53.02	48,6% to 57,41%	76.51
> 2.315	100	85,75% to 100%	53.22	48,79% to 57,6%	76.61
> 2.35	100	85,75% to 100%	53.41	48,99% to 57,79%	76.705
> 2.4	100	85,75% to 100%	53.61	49,18% to 57,99%	76.805
> 2.425	100	85,75% to 100%	53.8	49,38% to 58,18%	76.9
> 2.435	100	85,75% to 100%	54	49,57% to 58,37%	77
> 2.49	100	85,75% to 100%	54.39	49,96% to 58,76%	77.195
> 2.545	100	85,75% to 100%	54.78	50,35% to 59,14%	77.39
> 2.57	100	85,75% to 100%	54.97	50,55% to 59,33%	77.485
> 2.595	100	85,75% to 100%	55.36	50,94% to 59,72%	77.68
> 2.615	100	85,75% to 100%	55.56	51,14% to 59,91%	77.78
> 2.635	100	85,75% to 100%	55.75	51,33% to 60,1%	77.875
> 2.655	100	85,75% to 100%	55.95	51,53% to 60,29%	77.975
> 2.675	100	85,75% to 100%	56.14	51,72% to 60,49%	78.07
> 2.7	100	85,75% to 100%	56.34	51,92% to 60,68%	78.17
> 2.73	100	85,75% to 100%	56.53	52,12% to 60,87%	78.265
> 2.755	100	85,75% to 100%	56.73	52,31% to 61,06%	78.365
> 2.79	100	85,75% to 100%	56.92	52,51% to 61,25%	78.46
> 2.845	100	85,75% to 100%	57.12	52,7% to 61,44%	78.56
> 2.935	100	85,75% to 100%	57.7	53,29% to 62,02%	78.85
> 2.995	100	85,75% to 100%	57.89	53,49% to 62,21%	78.945
> 3.005	100	85,75% to 100%	58.09	53,69% to 62,4%	79.045
> 3.04	100	85,75% to 100%	58.28	53,88% to 62,59%	79.14
> 3.075	100	85,75% to 100%	58.48	54,08% to 62,78%	79.24
> 3.085	100	85,75% to 100%	58.67	54,28% to 62,97%	79.335
> 3.095	100	85,75% to 100%	58.87	54,47% to 63,16%	79.435
> 3.105	100	85,75% to 100%	59.06	54,67% to 63,35%	79.53
> 3.13	100	85,75% to 100%	59.26	54,87% to 63,54%	79.63
> 3.155	100	85,75% to 100%	59.45	55,06% to 63,74%	79.725
> 3.2	100	85,75% to 100%	59.65	55,26% to 63,93%	79.825
> 3.25	100	85,75% to 100%	59.84	55,46% to 64,12%	79.92
> 3.265	100	85,75% to 100%	60.04	55,66% to 64,31%	80.02
> 3.32	100	85,75% to 100%	60.43	56,05% to 64,69%	80.215
> 3.385	100	85,75% to 100%	60.82	56,44% to 65,07%	80.41
> 3.425	100	85,75% to 100%	61.01	56,64% to 65,26%	80.505
> 3.46	100	85,75% to 100%	61.4	57,04% to 65,64%	80.7
> 3.48	100	85,75% to 100%	61.6	57,24% to 65,83%	80.8
> 3.525	100	85,75% to 100%	61.79	57,43% to 66,02%	80.895
> 3.575	100	85,75% to 100%	61.99	57,63% to 66,21%	80.995
> 3.61	100	85,75% to 100%	62.18	57,83% to 66,4%	81.09
> 3.655	100	85,75% to 100%	62.38	58,03% to 66,59%	81.19
> 3.69	100	85,75% to 100%	62.57	58,23% to 66,78%	81.285
> 3.71	100	85,75% to 100%	62.77	58,42% to 66,96%	81.385
> 3.78	100	85,75% to 100%	62.96	58,62% to 67,15%	81.48
> 3.855	100	85,75% to 100%	63.16	58,82% to 67,34%	81.58
> 3.88	100	85,75% to 100%	63.35	59,02% to 67,53%	81.675
> 3.905	100	85,75% to 100%	63.94	59,61% to 68,1%	81.97
> 3.95	100	85,75% to 100%	64.13	59,81% to 68,29%	82.065
> 4.03	100	85,75% to 100%	64.33	60,01% to 68,48%	82.165
> 4.14	100	85,75% to 100%	64.52	60,21% to 68,67%	82.26
> 4.24	100	85,75% to 100%	64.91	60,61% to 69,04%	82.455
> 4.335	100	85,75% to 100%	65.11	60,81% to 69,23%	82.555
> 4.4	100	85,75% to 100%	65.3	61,01% to 69,42%	82.65
> 4.42	100	85,75% to 100%	65.5	61,21% to 69,61%	82.75
> 4.445	100	85,75% to 100%	65.69	61,41% to 69,8%	82.845
> 4.47	100	85,75% to 100%	65.89	61,6% to 69,99%	82.945
> 4.49	100	85,75% to 100%	66.08	61,8% to 70,17%	83.04
> 4.505	100	85,75% to 100%	66.28	62% to 70,36%	83.14
> 4.525	100	85,75% to 100%	66.47	62,2% to 70,55%	83.235
> 4.545	100	85,75% to 100%	66.67	62,4% to 70,74%	83.335
> 4.565	100	85,75% to 100%	66.86	62,6% to 70,93%	83.43
> 4.615	100	85,75% to 100%	67.06	62,8% to 71,11%	83.53
> 4.655	100	85,75% to 100%	67.25	63% to 71,3%	83.625
> 4.73	100	85,75% to 100%	67.45	63,2% to 71,49%	83.725
> 4.81	100	85,75% to 100%	67.84	63,6% to 71,86%	83.92
> 4.855	100	85,75% to 100%	68.03	63,8% to 72,05%	84.015
> 4.895	100	85,75% to 100%	68.23	64% to 72,24%	84.115
> 4.94	100	85,75% to 100%	68.42	64,2% to 72,42%	84.21
> 5.005	100	85,75% to 100%	68.62	64,4% to 72,61%	84.31
> 5.075	100	85,75% to 100%	68.81	64,6% to 72,8%	84.405
> 5.135	100	85,75% to 100%	69.2	65,01% to 73,17%	84.6
> 5.16	100	85,75% to 100%	69.4	65,21% to 73,36%	84.7
> 5.21	95.83	78,88% to 99,89%	69.4	65,21% to 73,36%	82.615
> 5.31	95.83	78,88% to 99,89%	69.59	65,41% to 73,55%	82.71
> 5.4	95.83	78,88% to 99,89%	69.79	65,61% to 73,73%	82.81
> 5.46	95.83	78,88% to 99,89%	69.98	65,81% to 73,92%	82.905
> 5.535	95.83	78,88% to 99,89%	70.18	66,01% to 74,11%	83.005
> 5.595	95.83	78,88% to 99,89%	70.37	66,21% to 74,29%	83.1
> 5.66	95.83	78,88% to 99,89%	70.57	66,41% to 74,48%	83.2
> 5.715	95.83	78,88% to 99,89%	70.76	66,61% to 74,66%	83.295
> 5.73	95.83	78,88% to 99,89%	70.96	66,82% to 74,85%	83.395
> 5.835	95.83	78,88% to 99,89%	71.15	67,02% to 75,04%	83.49
> 5.94	95.83	78,88% to 99,89%	71.35	67,22% to 75,22%	83.59
> 6.095	95.83	78,88% to 99,89%	71.54	67,42% to 75,41%	83.685
> 6.28	95.83	78,88% to 99,89%	71.73	67,62% to 75,59%	83.78
> 6.395	95.83	78,88% to 99,89%	71.93	67,83% to 75,78%	83.88
> 6.475	95.83	78,88% to 99,89%	72.12	68,03% to 75,97%	83.975
> 6.485	95.83	78,88% to 99,89%	72.32	68,23% to 76,15%	84.075
> 6.565	95.83	78,88% to 99,89%	72.51	68,43% to 76,34%	84.17
> 6.66	95.83	78,88% to 99,89%	72.71	68,63% to 76,52%	84.27
> 6.765	95.83	78,88% to 99,89%	72.9	68,84% to 76,71%	84.365
> 6.87	95.83	78,88% to 99,89%	73.1	69,04% to 76,89%	84.465
> 6.93	95.83	78,88% to 99,89%	73.29	69,24% to 77,08%	84.56
> 6.985	95.83	78,88% to 99,89%	73.49	69,44% to 77,26%	84.66
> 7.01	95.83	78,88% to 99,89%	73.68	69,65% to 77,45%	84.755
> 7.15	95.83	78,88% to 99,89%	73.88	69,85% to 77,63%	84.855
> 7.33	95.83	78,88% to 99,89%	74.07	70,05% to 77,82%	84.95
> 7.39	95.83	78,88% to 99,89%	74.27	70,26% to 78%	85.05
> 7.45	95.83	78,88% to 99,89%	74.46	70,46% to 78,18%	85.145
> 7.535	95.83	78,88% to 99,89%	74.66	70,66% to 78,37%	85.245
> 7.585	95.83	78,88% to 99,89%	74.85	70,87% to 78,55%	85.34
> 7.72	95.83	78,88% to 99,89%	75.05	71,07% to 78,74%	85.44
> 7.85	95.83	78,88% to 99,89%	75.24	71,27% to 78,92%	85.535
> 7.865	95.83	78,88% to 99,89%	75.44	71,48% to 79,11%	85.635
> 7.91	95.83	78,88% to 99,89%	75.63	71,68% to 79,29%	85.73
> 7.965	95.83	78,88% to 99,89%	75.83	71,88% to 79,47%	85.83
> 8	95.83	78,88% to 99,89%	76.02	72,09% to 79,66%	85.925
> 8.2	95.83	78,88% to 99,89%	76.22	72,29% to 79,84%	86.025
> 8.405	95.83	78,88% to 99,89%	76.41	72,5% to 80,02%	86.12
> 8.465	95.83	78,88% to 99,89%	76.8	72,9% to 80,39%	86.315
> 8.535	95.83	78,88% to 99,89%	77	73,11% to 80,57%	86.415
> 8.58	95.83	78,88% to 99,89%	77.19	73,31% to 80,76%	86.51
> 8.895	95.83	78,88% to 99,89%	77.39	73,52% to 80,94%	86.61
> 9.305	95.83	78,88% to 99,89%	77.58	73,72% to 81,12%	86.705
> 9.485	95.83	78,88% to 99,89%	77.78	73,93% to 81,3%	86.805
> 9.57	95.83	78,88% to 99,89%	77.97	74,13% to 81,49%	86.9
> 9.73	95.83	78,88% to 99,89%	78.17	74,34% to 81,67%	87
> 9.89	95.83	78,88% to 99,89%	78.36	74,54% to 81,85%	87.095
> 9.925	95.83	78,88% to 99,89%	78.56	74,75% to 82,03%	87.195
> 10.08	95.83	78,88% to 99,89%	78.75	74,95% to 82,22%	87.29
> 10.27	95.83	78,88% to 99,89%	78.95	75,16% to 82,4%	87.39
> 10.42	95.83	78,88% to 99,89%	79.14	75,37% to 82,58%	87.485
> 10.72	95.83	78,88% to 99,89%	79.34	75,57% to 82,76%	87.585
> 10.96	95.83	78,88% to 99,89%	79.53	75,78% to 82,94%	87.68
> 11.02	95.83	78,88% to 99,89%	79.73	75,98% to 83,12%	87.78
> 11.06	95.83	78,88% to 99,89%	80.12	76,4% to 83,49%	87.975
> 11.31	95.83	78,88% to 99,89%	80.51	76,81% to 83,85%	88.17
> 11.61	95.83	78,88% to 99,89%	80.7	77,02% to 84,03%	88.265
> 12.13	95.83	78,88% to 99,89%	80.9	77,22% to 84,21%	88.365
> 12.66	95.83	78,88% to 99,89%	81.09	77,43% to 84,39%	88.46
> 12.81	95.83	78,88% to 99,89%	81.29	77,64% to 84,57%	88.56
> 13.07	95.83	78,88% to 99,89%	81.48	77,84% to 84,75%	88.655
> 13.27	95.83	78,88% to 99,89%	81.68	78,05% to 84,93%	88.755
> 13.31	95.83	78,88% to 99,89%	81.87	78,26% to 85,11%	88.85
> 13.56	95.83	78,88% to 99,89%	82.07	78,47% to 85,29%	88.95
> 13.85	95.83	78,88% to 99,89%	82.26	78,68% to 85,47%	89.045
> 14.13	95.83	78,88% to 99,89%	82.46	78,88% to 85,65%	89.145
> 14.5	95.83	78,88% to 99,89%	82.65	79,09% to 85,83%	89.24
> 14.78	95.83	78,88% to 99,89%	82.85	79,3% to 86,01%	89.34
> 15.01	95.83	78,88% to 99,89%	83.04	79,51% to 86,19%	89.435
> 15.23	95.83	78,88% to 99,89%	83.24	79,72% to 86,37%	89.535
> 15.33	95.83	78,88% to 99,89%	83.43	79,93% to 86,55%	89.63
> 15.42	95.83	78,88% to 99,89%	83.63	80,13% to 86,72%	89.73
> 15.55	95.83	78,88% to 99,89%	83.82	80,34% to 86,9%	89.825
> 15.68	95.83	78,88% to 99,89%	84.02	80,55% to 87,08%	89.925
> 15.84	95.83	78,88% to 99,89%	84.21	80,76% to 87,26%	90.02
> 16.04	95.83	78,88% to 99,89%	84.41	80,97% to 87,44%	90.12
> 16.2	95.83	78,88% to 99,89%	84.6	81,18% to 87,61%	90.215
> 16.62	95.83	78,88% to 99,89%	84.8	81,39% to 87,79%	90.315
> 17.07	95.83	78,88% to 99,89%	84.99	81,6% to 87,97%	90.41
> 17.2	95.83	78,88% to 99,89%	85.19	81,81% to 88,15%	90.51
> 17.57	95.83	78,88% to 99,89%	85.38	82,02% to 88,32%	90.605
> 17.91	91.67	73% to 98,97%	85.38	82,02% to 88,32%	88.525
> 18.05	91.67	73% to 98,97%	85.58	82,23% to 88,5%	88.625
> 18.3	91.67	73% to 98,97%	85.96	82,65% to 88,85%	88.815
> 18.46	91.67	73% to 98,97%	86.16	82,87% to 89,03%	88.915
> 18.56	91.67	73% to 98,97%	86.35	83,08% to 89,21%	89.01
> 18.65	91.67	73% to 98,97%	86.55	83,29% to 89,38%	89.11
> 18.69	91.67	73% to 98,97%	86.74	83,5% to 89,56%	89.205
> 18.74	91.67	73% to 98,97%	86.94	83,71% to 89,73%	89.305
> 18.9	91.67	73% to 98,97%	87.13	83,92% to 89,91%	89.4
> 19.43	91.67	73% to 98,97%	87.33	84,14% to 90,08%	89.5
> 19.99	91.67	73% to 98,97%	87.52	84,35% to 90,26%	89.595
> 20.27	91.67	73% to 98,97%	87.72	84,56% to 90,43%	89.695
> 20.67	91.67	73% to 98,97%	87.91	84,78% to 90,61%	89.79
> 21	91.67	73% to 98,97%	88.11	84,99% to 90,78%	89.89
> 21.57	91.67	73% to 98,97%	88.3	85,2% to 90,96%	89.985
> 22.32	91.67	73% to 98,97%	88.5	85,42% to 91,13%	90.085
> 22.64	91.67	73% to 98,97%	88.69	85,63% to 91,3%	90.18
> 22.97	87.5	67,64% to 97,34%	88.69	85,63% to 91,3%	88.095
> 23.32	87.5	67,64% to 97,34%	88.89	85,84% to 91,48%	88.195
> 23.49	87.5	67,64% to 97,34%	89.08	86,06% to 91,65%	88.29
> 23.68	87.5	67,64% to 97,34%	89.28	86,27% to 91,82%	88.39
> 23.83	87.5	67,64% to 97,34%	89.47	86,49% to 91,99%	88.485
> 24.03	87.5	67,64% to 97,34%	89.67	86,7% to 92,16%	88.585
> 24.26	87.5	67,64% to 97,34%	89.86	86,92% to 92,34%	88.68
> 24.55	87.5	67,64% to 97,34%	90.06	87,14% to 92,51%	88.78
> 25.03	87.5	67,64% to 97,34%	90.25	87,35% to 92,68%	88.875
> 25.35	87.5	67,64% to 97,34%	90.45	87,57% to 92,85%	88.975
> 25.67	87.5	67,64% to 97,34%	90.64	87,79% to 93,02%	89.07
> 26.12	87.5	67,64% to 97,34%	90.84	88% to 93,19%	89.17
> 26.54	87.5	67,64% to 97,34%	91.03	88,22% to 93,36%	89.265
> 26.88	87.5	67,64% to 97,34%	91.23	88,44% to 93,53%	89.365
> 27.15	83.33	62,62% to 95,26%	91.23	88,44% to 93,53%	87.28
> 28	83.33	62,62% to 95,26%	91.42	88,66% to 93,7%	87.375
> 28.95	83.33	62,62% to 95,26%	91.62	88,88% to 93,87%	87.475
> 29.54	83.33	62,62% to 95,26%	91.81	89,09% to 94,04%	87.57
> 29.91	83.33	62,62% to 95,26%	92.01	89,31% to 94,2%	87.67
> 30.04	79.17	57,85% to 92,87%	92.01	89,31% to 94,2%	85.59
> 30.19	79.17	57,85% to 92,87%	92.2	89,53% to 94,37%	85.685
> 30.33	79.17	57,85% to 92,87%	92.4	89,75% to 94,54%	85.785
> 30.77	79.17	57,85% to 92,87%	92.59	89,97% to 94,71%	85.88
> 31.6	79.17	57,85% to 92,87%	92.79	90,2% to 94,87%	85.98
> 32.14	79.17	57,85% to 92,87%	92.98	90,42% to 95,04%	86.075
> 32.21	79.17	57,85% to 92,87%	93.18	90,64% to 95,2%	86.175
> 32.65	75	53,29% to 90,23%	93.18	90,64% to 95,2%	84.09
> 33.28	75	53,29% to 90,23%	93.37	90,86% to 95,37%	84.185
> 33.91	75	53,29% to 90,23%	93.57	91,08% to 95,53%	84.285
> 34.69	75	53,29% to 90,23%	93.76	91,31% to 95,69%	84.38
> 35.18	75	53,29% to 90,23%	93.96	91,53% to 95,86%	84.48
> 35.34	75	53,29% to 90,23%	94.15	91,76% to 96,02%	84.575
> 35.56	75	53,29% to 90,23%	94.35	91,98% to 96,18%	84.675
> 36.04	75	53,29% to 90,23%	94.54	92,21% to 96,34%	84.77
> 36.5	70.83	48,91% to 87,38%	94.54	92,21% to 96,34%	82.685
> 36.85	70.83	48,91% to 87,38%	94.74	92,43% to 96,5%	82.785
> 37.22	70.83	48,91% to 87,38%	94.93	92,66% to 96,66%	82.88
> 37.72	70.83	48,91% to 87,38%	95.13	92,89% to 96,82%	82.98
> 38.09	66.67	44,68% to 84,37%	95.13	92,89% to 96,82%	80.9
> 38.82	62.5	40,59% to 81,2%	95.13	92,89% to 96,82%	78.815
> 39.75	62.5	40,59% to 81,2%	95.32	93,12% to 96,98%	78.91
> 41.06	62.5	40,59% to 81,2%	95.52	93,35% to 97,14%	79.01
> 42.5	62.5	40,59% to 81,2%	95.71	93,58% to 97,29%	79.105
> 43.21	62.5	40,59% to 81,2%	95.91	93,81% to 97,45%	79.205
> 43.62	62.5	40,59% to 81,2%	96.1	94,04% to 97,6%	79.3
> 43.88	62.5	40,59% to 81,2%	96.3	94,28% to 97,76%	79.4
> 44.01	62.5	40,59% to 81,2%	96.49	94,51% to 97,91%	79.495
> 44.23	62.5	40,59% to 81,2%	96.69	94,75% to 98,06%	79.595
> 46.57	58.33	36,64% to 77,89%	96.69	94,75% to 98,06%	77.51
> 48.86	58.33	36,64% to 77,89%	96.88	94,98% to 98,21%	77.605
> 49.32	54.17	32,82% to 74,45%	96.88	94,98% to 98,21%	75.525
> 51.28	54.17	32,82% to 74,45%	97.08	95,22% to 98,35%	75.625
> 53.34	54.17	32,82% to 74,45%	97.27	95,46% to 98,5%	75.72
> 53.85	54.17	32,82% to 74,45%	97.47	95,71% to 98,64%	75.82
> 55.4	50	29,12% to 70,88%	97.47	95,71% to 98,64%	73.735
> 57.65	45.83	25,55% to 67,18%	97.47	95,71% to 98,64%	71.65
> 58.9	41.67	22,11% to 63,36%	97.47	95,71% to 98,64%	69.57
> 59.88	41.67	22,11% to 63,36%	97.66	95,95% to 98,79%	69.665
> 61.36	37.5	18,8% to 59,41%	97.66	95,95% to 98,79%	67.58
> 63.35	37.5	18,8% to 59,41%	97.86	96,2% to 98,92%	67.68
> 64.74	37.5	18,8% to 59,41%	98.05	96,44% to 99,06%	67.775
> 65.14	33.33	15,63% to 55,32%	98.05	96,44% to 99,06%	65.69
> 68.18	33.33	15,63% to 55,32%	98.25	96,7% to 99,19%	65.79
> 71.4	33.33	15,63% to 55,32%	98.44	96,95% to 99,32%	65.885
> 72.36	33.33	15,63% to 55,32%	98.64	97,21% to 99,45%	65.985
> 73.14	33.33	15,63% to 55,32%	98.83	97,47% to 99,57%	66.08
> 76.25	33.33	15,63% to 55,32%	99.03	97,74% to 99,68%	66.18
> 84.79	33.33	15,63% to 55,32%	99.22	98,02% to 99,79%	66.275
> 92.25	33.33	15,63% to 55,32%	99.42	98,3% to 99,88%	66.375
> 102	29.17	12,62% to 51,09%	99.42	98,3% to 99,88%	64.295
> 114.2	25	9,773% to 46,71%	99.42	98,3% to 99,88%	62.21
> 125.7	25	9,773% to 46,71%	99.61	98,6% to 99,95%	62.305
> 135.8	20.83	7,132% to 42,15%	99.61	98,6% to 99,95%	60.22
> 145.7	16.67	4,735% to 37,38%	99.61	98,6% to 99,95%	58.14
> 171.4	12.5	2,656% to 32,36%	99.61	98,6% to 99,95%	56.055
> 193.6	8.333	1,026% to 27%	99.61	98,6% to 99,95%	53.9715
> 198.7	8.333	1,026% to 27%	99.81	98,92% to 100%	54.0715
> 209	8.333	1,026% to 27%	100	99,28% to 100%	54.1665
> 229.1	4.167	0,1054% to 21,12%	100	99,28% to 100%	52.0835

## Sheet: TG2 IgA
Cut off	Sensitivity%	95% CI	Specificity%	95% CI	Accuracy%
> 0.175	100	85,75% to 100%	93.76	91,31% to 95,69%	96.88
> 0.385	100	85,75% to 100%	93.96	91,53% to 95,86%	96.98
> 0.465	100	85,75% to 100%	94.15	91,76% to 96,02%	97.075
> 0.545	100	85,75% to 100%	94.35	91,98% to 96,18%	97.175
> 0.59	100	85,75% to 100%	94.54	92,21% to 96,34%	97.27
> 0.64	100	85,75% to 100%	94.74	92,43% to 96,5%	97.37
> 0.715	100	85,75% to 100%	95.13	92,89% to 96,82%	97.565
> 0.755	100	85,75% to 100%	95.32	93,12% to 96,98%	97.66
> 0.775	100	85,75% to 100%	95.52	93,35% to 97,14%	97.76
> 0.81	100	85,75% to 100%	95.71	93,58% to 97,29%	97.855
> 0.87	100	85,75% to 100%	95.91	93,81% to 97,45%	97.955
> 0.915	100	85,75% to 100%	96.1	94,04% to 97,6%	98.05
> 0.925	100	85,75% to 100%	96.3	94,28% to 97,76%	98.15
> 0.945	100	85,75% to 100%	96.69	94,75% to 98,06%	98.345
> 0.975	100	85,75% to 100%	96.88	94,98% to 98,21%	98.44
> 1.005	100	85,75% to 100%	97.08	95,22% to 98,35%	98.54
> 1.07	100	85,75% to 100%	97.27	95,46% to 98,5%	98.635
> 1.16	100	85,75% to 100%	97.47	95,71% to 98,64%	98.735
> 1.215	100	85,75% to 100%	97.66	95,95% to 98,79%	98.83
> 1.245	100	85,75% to 100%	97.86	96,2% to 98,92%	98.93
> 1.28	100	85,75% to 100%	98.05	96,44% to 99,06%	99.025
> 1.38	100	85,75% to 100%	98.25	96,7% to 99,19%	99.125
> 1.48	100	85,75% to 100%	98.44	96,95% to 99,32%	99.22
> 1.55	100	85,75% to 100%	98.64	97,21% to 99,45%	99.32
> 1.695	100	85,75% to 100%	98.83	97,47% to 99,57%	99.415
> 1.91	100	85,75% to 100%	99.03	97,74% to 99,68%	99.515
> 2.625	100	85,75% to 100%	99.22	98,02% to 99,79%	99.61
> 3.255	100	85,75% to 100%	99.42	98,3% to 99,88%	99.71
> 3.975	100	85,75% to 100%	99.61	98,6% to 99,95%	99.805
> 11.03	100	85,75% to 100%	99.81	98,92% to 100%	99.905
> 19	95.83	78,88% to 99,89%	99.81	98,92% to 100%	97.82
> 20.7	95.83	78,88% to 99,89%	100	99,28% to 100%	97.915
> 21.25	91.67	73% to 98,97%	100	99,28% to 100%	95.835
> 27.25	87.5	67,64% to 97,34%	100	99,28% to 100%	93.75
> 33.8	83.33	62,62% to 95,26%	100	99,28% to 100%	91.665
> 35.85	79.17	57,85% to 92,87%	100	99,28% to 100%	89.585
> 39.3	75	53,29% to 90,23%	100	99,28% to 100%	87.5
> 42.3	70.83	48,91% to 87,38%	100	99,28% to 100%	85.415
> 43.2	66.67	44,68% to 84,37%	100	99,28% to 100%	83.335
> 43.55	62.5	40,59% to 81,2%	100	99,28% to 100%	81.25
> 44.3	58.33	36,64% to 77,89%	100	99,28% to 100%	79.165
> 50.2	54.17	32,82% to 74,45%	100	99,28% to 100%	77.085
> 59.25	50	29,12% to 70,88%	100	99,28% to 100%	75
> 64.9	45.83	25,55% to 67,18%	100	99,28% to 100%	72.915
> 68.65	41.67	22,11% to 63,36%	100	99,28% to 100%	70.835
> 71.85	37.5	18,8% to 59,41%	100	99,28% to 100%	68.75
> 76.7	33.33	15,63% to 55,32%	100	99,28% to 100%	66.665
> 89.95	29.17	12,62% to 51,09%	100	99,28% to 100%	64.585
> 108.8	25	9,773% to 46,71%	100	99,28% to 100%	62.5
> 130	20.83	7,132% to 42,15%	100	99,28% to 100%	60.415
> 170.5	16.67	4,735% to 37,38%	100	99,28% to 100%	58.335
> 218	12.5	2,656% to 32,36%	100	99,28% to 100%	56.25
> 238	8.333	1,026% to 27%	100	99,28% to 100%	54.1665
> 252.5	4.167	0,1054% to 21,12%	100	99,28% to 100%	52.0835
